# Supplementary material
Source: ML conference proceedings conference paper supplement (https://aclanthology.org/P14-2120)
Supplement: Datasets [file resource.xls]

## Sheet: resource
dataset-name	entailment-annotation	uuid	topic-id	document-id	sentence-number	hypothesis-id	predicate-word	predicate-lemma	argument-word	argument-lemma	argument-phrase in hypothesis	argument-type	argument sentence-number in document	implicit-argument annotation	other argument corefers
RTE6-DEV	YES	23bb29b1-4f1f-443f-be19-420f9b92720e	D0909	AFP_ENG_20050723.0072	2	200	negotiator	negotiator	Fein	fein	Sinn Fein	OBJECT	1	YES	NO
RTE6-DEV	YES	4dc79713-52d1-4470-8acd-afd02d86c8cf	D0909	AFP_ENG_20050629.0709	2	205	established	establish	government	government	The Northern Ireland 's local government	OBJECT	3	YES	YES
RTE6-DEV	YES	cabd88d9-e237-46a2-b647-36049732b30e	D0909	AFP_ENG_20050629.0709	2	205	established	establish	accord	accord	a 1998 peace accord	OBJECT	1	YES	YES
RTE6-DEV	YES	3a4c5994-227f-49c1-a901-b947b542f921	D0909	AFP_ENG_20050613.0282	5	214	embrace	embrace	activity	activity	purely democratic activity	OBJECT	5	NO	NO
RTE6-DEV	YES	a296ab1e-f49c-417c-9842-9ac9fe005db0	D0909	AFP_ENG_20050613.0282	5	214	embrace	embrace	Adams	adams	Gerry Adams	SUBJECT	5	YES	NO
RTE6-DEV	YES	e692ecc2-44ad-465c-a4eb-5fb986a3d6be	D0909	AFP_ENG_20050614.0518	5	214	embrace	embrace	activity	activity	purely democratic activity	OBJECT	14	NO	NO
RTE6-DEV	YES	ca83ffcd-ab13-48bd-a344-79c47e26cc13	D0909	AFP_ENG_20050614.0518	5	214	embrace	embrace	Adams	adams	Gerry Adams	SUBJECT	5	YES	NO
RTE6-DEV	YES	0d3d22ea-b30f-4ab4-ab25-6b4ba7260457	D0909	AFP_ENG_20050627.0365	7	214	embrace	embrace	activity	activity	purely democratic activity	OBJECT	8	NO	NO
RTE6-DEV	YES	50fb173a-d213-4a80-80a4-55508dac71f2	D0909	AFP_ENG_20050627.0365	7	214	embrace	embrace	Adams	adams	Gerry Adams	SUBJECT	7	YES	NO
RTE6-DEV	YES	11461df3-ef20-4ead-b828-7da455d33e22	D0909	AFP_ENG_20050723.0072	10	214	embrace	embrace	Adams	adams	Gerry Adams	SUBJECT	10	YES	NO
RTE6-DEV	YES	731a643f-f0eb-48ef-bf09-696b7e8a88e7	D0909	AFP_ENG_20050627.0365	7	216	take	take	Adams	adams	Gerry Adams	SUBJECT	7	NO	NO
RTE6-DEV	YES	8bb102ff-5ffd-4f3e-b447-9e9aa9999a70	D0909	AFP_ENG_20050723.0072	8	221	denies	deny	Adams	adams	Gerry Adams	SUBJECT	10	YES	YES
RTE6-DEV	YES	af177115-9c72-4e14-8c22-23e2752c5f27	D0909	AFP_ENG_20050723.0072	8	221	denies	deny	reports	report	reports	OBJECT	0	YES	NO
RTE6-DEV	YES	ff9ffad7-cba0-4a86-a86b-8a7fde5705c8	D0912	APW_ENG_20050807.0002	7	74	killed	kill	Sheehan	sheehan	Casey Sheehan	OBJECT	6	NO	NO
RTE6-DEV	YES	d1068625-1e68-4d84-a031-22a0c768c938	D0912	APW_ENG_20050807.0002	0	74	killed	kill	Sheehan	sheehan	Casey Sheehan	OBJECT	3	NO	NO
RTE6-DEV	YES	9919282a-3ee1-472b-8bfd-533a10174fc9	D0912	APW_ENG_20050807.0569	16	74	killed	kill	Sheehan	sheehan	Casey Sheehan	OBJECT	15	NO	NO
RTE6-DEV	YES	9082d1eb-11e2-4338-acb1-772e96e563e0	D0912	APW_ENG_20050811.0108	11	74	killed	kill	Sheehan	sheehan	Casey Sheehan	OBJECT	10	NO	NO
RTE6-DEV	YES	ab1d5d39-a253-4b8e-90ac-6f9e4e5ee99c	D0912	APW_ENG_20050811.0108	1	74	killed	kill	Sheehan	sheehan	Casey Sheehan	OBJECT	3	NO	NO
RTE6-DEV	YES	0d7bc991-a574-4f88-b7b0-887afaa1cdf8	D0912	APW_ENG_20050811.0720	3	74	killed	kill	Sheehan	sheehan	Casey Sheehan	OBJECT	4	NO	NO
RTE6-DEV	YES	9c2632ff-fdf1-49bb-a743-d93c8fce0cb3	D0912	APW_ENG_20050811.0720	3	74	killed	kill	Iraq	iraq	Iraq	OBJECT	3	YES	YES
RTE6-DEV	YES	1b672875-a251-42af-8dde-0af311833c1c	D0912	APW_ENG_20050811.0720	34	74	killed	kill	Sheehan	sheehan	Casey Sheehan	OBJECT	32	NO	NO
RTE6-DEV	YES	f0450341-4ed2-42dc-99bc-8e2ef5516f57	D0912	APW_ENG_20050811.0720	34	74	killed	kill	Iraq	iraq	Iraq	OBJECT	3	YES	NO
RTE6-DEV	YES	d0e63289-0038-457d-a6c9-24ae55b533b9	D0912	LTW_ENG_20050806.0052	14	74	killed	kill	Iraq	iraq	Iraq	OBJECT	15	YES	YES
RTE6-DEV	YES	a8d61c8c-3b54-4984-88bf-a25e43b2cb52	D0912	LTW_ENG_20050811.0096	1	74	killed	kill	Sheehan	sheehan	Casey Sheehan	OBJECT	1	NO	NO
RTE6-DEV	YES	bedd9885-40a1-43d3-8acc-51987dfc0b59	D0912	LTW_ENG_20050811.0138	21	74	killed	kill	Iraq	iraq	Iraq	OBJECT	21	YES	YES
RTE6-DEV	YES	55ac3f2e-f1c7-44d2-a618-726a6f6c304a	D0912	NYT_ENG_20050806.0235	1	74	killed	kill	Sheehan	sheehan	Casey Sheehan	OBJECT	2	NO	NO
RTE6-DEV	YES	b32fd768-ca12-4605-9ea0-59f2741854b0	D0912	LTW_ENG_20050810.0126	27	75	war	war	Iraq	iraq	Iraq	SUBJECT	31	YES	NO
RTE6-DEV	YES	1dbc6fd3-bf5d-40ab-9c4a-82d26d14fac1	D0912	APW_ENG_20050811.0108	1	77	started	start	Sheehan	sheehan	Cindy Sheehan	SUBJECT	3	YES	YES
RTE6-DEV	YES	b418a2e7-3e83-4167-8169-c5bb5d5856bd	D0912	APW_ENG_20050811.0108	1	77	started	start	protest	protest	a protest	OBJECT	0	YES	YES
RTE6-DEV	YES	a8c5b3a8-60fd-4e7c-b863-5cd5d3bd6a31	D0912	LTW_ENG_20050810.0126	5	77	started	start	Sheehan	sheehan	Cindy Sheehan	SUBJECT	5	YES	NO
RTE6-DEV	YES	0f02da37-c4f9-4de3-a1b6-b6f31fc93140	D0912	LTW_ENG_20050810.0126	5	77	started	start	protest	protest	a protest	OBJECT	32	YES	YES
RTE6-DEV	YES	d12150bd-b9e6-41d6-9c78-54ff5d723b61	D0912	APW_ENG_20050807.0569	15	81	met	meet	Sheehan	sheehan	Cindy Sheehan	SUBJECT	15	YES	NO
RTE6-DEV	YES	9bd8d41b-7ad3-46ff-9eae-2edca7a4d36a	D0912	APW_ENG_20050811.0108	12	81	met	meet	Sheehan	sheehan	Cindy Sheehan	SUBJECT	12	YES	NO
RTE6-DEV	YES	42e69b06-7b75-434b-b225-fbccfc8db816	D0912	APW_ENG_20050811.0720	5	82	camped	camp	Sheehan	sheehan	Cindy Sheehan	SUBJECT	4	YES	YES
RTE6-DEV	YES	82451d20-0249-4377-90c4-a3c90cd2cf33	D0912	LTW_ENG_20050811.0096	1	82	camped	camp	Sheehan	sheehan	Cindy Sheehan	SUBJECT	1	YES	NO
RTE6-DEV	YES	09199be4-0d2e-42bd-a631-127200299ee8	D0912	LTW_ENG_20050811.0138	7	84	protest	protest	Sheehan	sheehan	Cindy Sheehan	SUBJECT	8	YES	NO
RTE6-DEV	YES	a30189e3-a06a-44e1-b894-55433e322ec6	D0912	LTW_ENG_20050811.0138	1	87	sympathizes	sympathize	Bush	bush	Bush	SUBJECT	1	YES	NO
RTE6-DEV	YES	3f5d4fd8-7519-4249-9a71-de7078df9a18	D0912	LTW_ENG_20050811.0138	1	87	sympathizes	sympathize	Sheehan	sheehan	Cindy Sheehan	OBJECT	2	YES	YES
RTE6-DEV	YES	9d8f43c0-43cb-426e-a340-e48b034f1fe0	D0912	LTW_ENG_20050811.0138	0	87	sympathizes	sympathize	Bush	bush	Bush	SUBJECT	0	YES	NO
RTE6-DEV	YES	cff32a11-6138-48e6-b4d3-f05f8a3e525d	D0912	LTW_ENG_20050811.0138	0	87	sympathizes	sympathize	Sheehan	sheehan	Cindy Sheehan	OBJECT	2	YES	YES
RTE6-DEV	YES	3c0c43f2-002c-40bc-868e-e90af7d8b54a	D0912	LTW_ENG_20050806.0052	1	89	met	meet	Sheehan	sheehan	Cindy Sheehan	SUBJECT	1	YES	YES
RTE6-DEV	YES	6c824ff7-a29f-40f1-a1e6-614179b57505	D0912	LTW_ENG_20050806.0052	1	89	met	meet	officials	official	2 Bush administration officials	OBJECT	2	NO	NO
RTE6-DEV	YES	6d6e690d-14b0-4db4-b8a7-2c9486ed39c3	D0912	LTW_ENG_20050806.0052	20	89	met	meet	Sheehan	sheehan	Cindy Sheehan	SUBJECT	19	YES	YES
RTE6-DEV	YES	68e7c243-1e16-45cd-a08e-cb404f89d2de	D0912	LTW_ENG_20050806.0052	20	89	met	meet	officials	official	2 Bush administration officials	OBJECT	2	YES	YES
RTE6-DEV	YES	ff46c0a4-ea91-4e30-8173-f67632b5e751	D0912	LTW_ENG_20050806.0052	6	89	met	meet	Sheehan	sheehan	Cindy Sheehan	SUBJECT	6	NO	NO
RTE6-DEV	YES	d392765a-e0d7-47a1-8f63-f24ea1dfbc78	D0912	LTW_ENG_20050806.0052	6	89	met	meet	officials	official	2 Bush administration officials	OBJECT	2	NO	NO
RTE6-DEV	YES	3b83ef54-b15f-43db-8fd0-2faa6e956cf1	D0912	LTW_ENG_20050810.0126	20	89	met	meet	Sheehan	sheehan	Cindy Sheehan	SUBJECT	19	YES	YES
RTE6-DEV	YES	a282f65e-f67e-4f91-84e3-7f65eb0cdfeb	D0912	LTW_ENG_20050811.0138	25	89	met	meet	Sheehan	sheehan	Cindy Sheehan	SUBJECT	25	YES	YES
RTE6-DEV	YES	b4a84d5e-1a08-43e6-bc58-46c37a84384b	D0912	LTW_ENG_20050811.0138	25	89	met	meet	officials	official	2 Bush administration officials	OBJECT	27	NO	NO
RTE6-DEV	YES	a22a6fb3-ddcf-417d-9524-264fd559ba0a	D0912	NYT_ENG_20050806.0235	6	89	met	meet	Sheehan	sheehan	Cindy Sheehan	SUBJECT	6	YES	YES
RTE6-DEV	YES	e64eda91-27ab-4d4d-908b-4c97e642b77b	D0912	NYT_ENG_20050806.0235	6	89	met	meet	officials	official	2 Bush administration officials	OBJECT	5	YES	YES
RTE6-DEV	YES	2a273d24-0745-476b-9e60-7c0e43ca68a0	D0912	NYT_ENG_20050806.0235	1	89	met	meet	Sheehan	sheehan	Cindy Sheehan	SUBJECT	2	YES	YES
RTE6-DEV	YES	39f02130-f6f3-4efa-ab86-1469853803f3	D0912	NYT_ENG_20050806.0235	1	89	met	meet	officials	official	2 Bush administration officials	OBJECT	1	YES	NO
RTE6-DEV	YES	28ecb75e-9443-48ad-8f5a-69057589c5a4	D0914	AFP_ENG_20041007.0771	19	68	attack	attack	tourists	tourist	Israeli tourists in Sinai	OBJECT	18	YES	NO
RTE6-DEV	YES	f96676c2-20e7-4e50-bf5b-a08d8b81ad73	D0914	AFP_ENG_20041007.0803	8	68	attack	attack	tourists	tourist	Israeli tourists in Sinai	OBJECT	7	YES	NO
RTE6-DEV	YES	80740d29-791b-4157-8fa3-e36e027a01d1	D0914	AFP_ENG_20041007.0837	4	68	attack	attack	tourists	tourist	Israeli tourists in Sinai	OBJECT	1	YES	NO
RTE6-DEV	YES	6e3ee3e6-ff86-4b82-b842-e0b5b69c5981	D0914	AFP_ENG_20041007.0861	4	68	attack	attack	tourists	tourist	Israeli tourists in Sinai	OBJECT	1	YES	NO
RTE6-DEV	YES	747c56eb-aadb-4f23-a201-6963a5a8ceb0	D0914	NYT_ENG_20041007.0255	9	68	attack	attack	tourists	tourist	Israeli tourists in Sinai	OBJECT	37	YES	NO
RTE6-DEV	YES	f9f90122-1f1c-4162-93bd-1e4dd7748302	D0914	NYT_ENG_20041007.0255	36	68	attack	attack	tourists	tourist	Israeli tourists in Sinai	OBJECT	37	YES	NO
RTE6-DEV	YES	c757ef6b-7e61-4094-ba49-3cfb9c272d5c	D0914	NYT_ENG_20041007.0255	55	68	attack	attack	tourists	tourist	Israeli tourists in Sinai	OBJECT	51	YES	NO
RTE6-DEV	YES	a15553b2-aa5f-4851-9b25-72d690fc55a6	D0914	XIN_ENG_20041007.0328	11	68	attack	attack	tourists	tourist	Israeli tourists in Sinai	OBJECT	8	YES	NO
RTE6-DEV	YES	a408786b-db7c-460b-aef2-c3de1e7eb7d5	D0914	AFP_ENG_20041007.0771	6	71	celebrating	celebrate	Israelis	israelis	Israelis	SUBJECT	6	YES	NO
RTE6-DEV	YES	67159062-8f5b-4075-a8f4-b7cdc676201f	D0914	AFP_ENG_20041007.0837	4	71	celebrating	celebrate	Israelis	israelis	Israelis	SUBJECT	4	YES	NO
RTE6-DEV	YES	2b37317e-b650-4c3f-9cd8-52338970fd2e	D0914	AFP_ENG_20041007.0861	4	71	celebrating	celebrate	Israelis	israelis	Israelis	SUBJECT	4	YES	NO
RTE6-DEV	YES	fc55e210-5f15-4987-b279-0da3bef3ffad	D0914	AFP_ENG_20041007.0769	1	72	killed	kill	blasts	blast	the blasts	OBJECT	0	YES	YES
RTE6-DEV	YES	a27aea12-8de2-4614-9578-16c8fc717217	D0914	AFP_ENG_20041007.0771	4	72	killed	kill	blasts	blast	the blasts	OBJECT	3	YES	YES
RTE6-DEV	YES	803843e4-4039-488e-acf3-eae59c412657	D0914	AFP_ENG_20041007.0771	0	72	killed	kill	people	people	At least 30 people	OBJECT	1	YES	NO
RTE6-DEV	YES	9ce62ef8-f9f6-462f-8508-ae2b5a1a7a7a	D0914	AFP_ENG_20041007.0786	3	72	killed	kill	blasts	blast	the blasts	OBJECT	1	YES	YES
RTE6-DEV	YES	f0da81b4-80e7-4413-9113-f0e536db4676	D0914	AFP_ENG_20041007.0803	0	72	killed	kill	people	people	At least 30 people	OBJECT	1	YES	NO
RTE6-DEV	YES	82a2cd7b-bc35-437e-87e7-29f0ac2f2476	D0914	AFP_ENG_20041007.0837	0	72	killed	kill	people	people	At least 30 people	OBJECT	1	YES	NO
RTE6-DEV	YES	a0a91aaa-bf2e-49be-9595-81dbe294e895	D0914	AFP_ENG_20041007.0837	0	72	killed	kill	blasts	blast	the blasts	OBJECT	8	YES	NO
RTE6-DEV	YES	22fb3d76-6c26-4a02-aed0-eeeedba1d93f	D0914	AFP_ENG_20041007.0837	1	72	killed	kill	blasts	blast	the blasts	OBJECT	8	YES	NO
RTE6-DEV	YES	c3f56e7f-169f-4929-b586-0e24154405c9	D0914	AFP_ENG_20041007.0861	0	72	killed	kill	people	people	At least 30 people	OBJECT	1	YES	NO
RTE6-DEV	YES	06b0c466-855c-4396-b3a0-5148230ed62b	D0914	AFP_ENG_20041007.0861	0	72	killed	kill	blasts	blast	the blasts	OBJECT	0	YES	NO
RTE6-DEV	YES	4b6ab5a3-e193-403b-bdff-44fd9e123b15	D0914	AFP_ENG_20041007.0861	1	72	killed	kill	blasts	blast	the blasts	OBJECT	0	YES	NO
RTE6-DEV	YES	d5d825eb-bb07-41c4-bd5b-ef457ee4fa38	D0914	NYT_ENG_20041007.0255	1	72	killed	kill	blasts	blast	the blasts	OBJECT	2	YES	YES
RTE6-DEV	YES	927f7e9d-e6ad-4ea8-90e8-06bee301f386	D0914	XIN_ENG_20041007.0328	1	72	killed	kill	blasts	blast	the blasts	OBJECT	2	YES	YES
RTE6-DEV	YES	9a17be66-cbfa-45ad-a78e-fe9d26f9e7ce	D0916	AFP_ENG_20060117.0612	1	121	kill	kill	captors	captor	Jill Carroll 's captors	SUBJECT	15	NO	NO
RTE6-DEV	YES	71c43b7c-db4f-4134-a783-d9183eed6446	D0916	AFP_ENG_20060117.0612	1	121	threatened	threaten	captors	captor	Jill Carroll 's captors	SUBJECT	15	NO	NO
RTE6-DEV	YES	293dbe76-9163-45e4-918c-3ddfbad90f7e	D0916	AFP_ENG_20060117.0612	0	121	kill	kill	captors	captor	Jill Carroll 's captors	SUBJECT	15	NO	NO
RTE6-DEV	YES	f4b4caf0-e3a1-44a5-8deb-f3138cb8b182	D0916	AFP_ENG_20060117.0612	0	121	threatened	threaten	captors	captor	Jill Carroll 's captors	SUBJECT	15	NO	NO
RTE6-DEV	YES	2166ad17-4398-494d-a814-6f8a73bd38eb	D0916	AFP_ENG_20060117.0629	1	121	captors	captor	Carroll	carroll	Jill Carroll 's	OBJECT	1	YES	YES
RTE6-DEV	YES	aa925511-aa65-43dc-8a26-38fc6be1efaf	D0916	AFP_ENG_20060117.0629	3	121	kill	kill	captors	captor	Jill Carroll 's captors	SUBJECT	1	YES	YES
RTE6-DEV	YES	d012c9c2-a767-45d6-905b-b442ded79dda	D0916	LTW_ENG_20060117.0137	1	121	kill	kill	captors	captor	Jill Carroll 's captors	SUBJECT	1	YES	NO
RTE6-DEV	YES	67805efe-a507-4ddc-acd0-4cad7a796eba	D0916	LTW_ENG_20060117.0137	1	121	captors	captor	Carroll	carroll	Jill Carroll 's	OBJECT	1	YES	YES
RTE6-DEV	YES	084ccc06-2253-4498-a24d-b35bd3a684df	D0916	LTW_ENG_20060117.0137	1	122	captors	captor	Carroll	carroll	Jill Carroll	OBJECT	1	YES	YES
RTE6-DEV	YES	a960ea97-83d8-4674-bad7-5370ff046717	D0916	AFP_ENG_20060109.0574	1	131	translator	translator	Carroll	carroll	Jill Carroll 's	UNKNOWN	1	YES	YES
RTE6-DEV	YES	321138b5-582d-486b-b52a-3fc973662067	D0916	AFP_ENG_20060110.0001	9	131	translator	translator	Carroll	carroll	Jill Carroll 's	UNKNOWN	9	YES	YES
RTE6-DEV	YES	a9c60a12-361b-47fe-beee-f8ebf750d733	D0916	LTW_ENG_20060117.0137	5	131	translator	translator	Carroll	carroll	Jill Carroll 's	UNKNOWN	4	YES	YES
RTE6-DEV	YES	b411a90a-32b9-4e27-bb12-e5cd2cb84199	D0916	AFP_ENG_20060109.0574	29	133	face	face	journalists	journalist	journalists	SUBJECT	24	YES	YES
RTE6-DEV	YES	910cf688-95a9-4f2c-bb5e-b04ad7be21ce	D0916	AFP_ENG_20060110.0024	2	135	works	work	Carroll	carroll	Jill Carroll	SUBJECT	2	YES	YES
RTE6-DEV	YES	fc030d21-c24c-48be-9fd8-3d8047745f99	D0916	AFP_ENG_20060110.0078	14	135	works	work	Carroll	carroll	Jill Carroll	SUBJECT	14	YES	YES
RTE6-DEV	YES	0c3d121e-f526-42c8-9acc-8565fb9b3416	D0916	AFP_ENG_20060110.0430	5	135	works	work	Carroll	carroll	Jill Carroll	SUBJECT	5	YES	YES
RTE6-DEV	YES	42794af7-76e9-4ed5-9245-1335ac39fc5a	D0916	AFP_ENG_20060117.0612	2	135	works	work	Carroll	carroll	Jill Carroll	SUBJECT	2	YES	YES
RTE6-DEV	YES	561e9bb9-01de-4b25-823c-354108afb47f	D0916	AFP_ENG_20060117.0629	4	135	works	work	Carroll	carroll	Jill Carroll	SUBJECT	4	YES	YES
RTE6-DEV	YES	92879afe-d588-4b93-bf9b-e8151d0d198e	D0916	AFP_ENG_20060110.0430	7	256	seized	seize	Carroll	carroll	Jill Carroll	OBJECT	5	YES	YES
RTE6-DEV	YES	57eff371-2aaa-4715-81a0-366decc9cb7b	D0916	AFP_ENG_20060117.0612	2	256	seized	seize	Carroll	carroll	Jill Carroll	OBJECT	2	YES	YES
RTE6-DEV	YES	cdc821e1-140b-47ba-856e-4d9954fb6fb8	D0916	AFP_ENG_20060109.0574	1	257	seized	seize	Carroll	carroll	Jill Carroll	OBJECT	1	YES	NO
RTE6-DEV	YES	f50f8dcc-b6cd-412f-aa8c-9c0416417d5d	D0916	AFP_ENG_20060109.0574	1	257	seized	seize	gunmen	gunman	gunmen	SUBJECT	17	YES	YES
RTE6-DEV	YES	8816fe0e-60a1-4e56-ab4b-e15b32c697ac	D0916	AFP_ENG_20060110.0001	9	257	seized	seize	Carroll	carroll	Jill Carroll	OBJECT	9	YES	NO
RTE6-DEV	YES	aadbbcd5-928c-4ee5-bbe0-27cc2914378b	D0916	AFP_ENG_20060110.0430	7	257	seized	seize	Carroll	carroll	Jill Carroll	OBJECT	5	YES	YES
RTE6-DEV	YES	31197d45-0c9b-458f-b218-7cb2306a4b5d	D0916	AFP_ENG_20060117.0612	2	257	seized	seize	Carroll	carroll	Jill Carroll	OBJECT	2	YES	YES
RTE6-DEV	YES	e0651bd8-ae2e-474e-aa19-7fc68b59f650	D0922	APW_ENG_20050323.0358	7	174	let	let	provisions	provisions	The Patriot Act provisions	SUBJECT	8	NO	NO
RTE6-DEV	YES	1f9ff553-133b-4211-ba94-33b5d70d6b81	D0922	NYT_ENG_20050322.0262	3	174	searches	search	homes	home	people 's homes or businesses	UNKNOWN	3	YES	NO
RTE6-DEV	YES	bc47ad3d-4ff6-4b93-b7ae-66e0243ac537	D0922	LTW_ENG_20050322.0139	5	175	expiring	expire	provisions	provisions	provisions of the Patriot Act	OBJECT	6	YES	YES
RTE6-DEV	YES	e04d1619-81e4-4452-972d-5121a53b8f48	D0922	APW_ENG_20050214.0666	4	178	passed	pass	Congress	congress	Congress	SUBJECT	1	YES	NO
RTE6-DEV	YES	efd6ee7e-e1e4-47b3-a57c-d9823b75508b	D0922	APW_ENG_20050317.0771	3	178	passed	pass	Congress	congress	Congress	SUBJECT	17	YES	NO
RTE6-DEV	YES	db99929e-0a8e-4536-89d6-f057f7da5045	D0922	APW_ENG_20050317.0771	3	178	passed	pass	Act	act	the Patriot Act	OBJECT	2	YES	YES
RTE6-DEV	YES	6e4261eb-255f-468c-8907-d3df43596c37	D0922	NYT_ENG_20041004.0143	1	178	passed	pass	Act	act	the Patriot Act	OBJECT	2	YES	YES
RTE6-DEV	YES	8ed5537f-7e47-49dd-b789-cd56e5407fa2	D0922	NYT_ENG_20041026.0202	2	182	comes	come	2005	2005	2005	OBJECT	3	NO	NO
RTE6-DEV	YES	230e4c0c-fb46-4ac8-a663-9d03eaba8ef9	D0922	APW_ENG_20050317.0771	2	183	expire	expire	sections	section	Many sections of the Patriot Act	SUBJECT	16	YES	NO
RTE6-DEV	YES	0d12c7fc-e075-4873-8f06-41a38d9c5835	D0922	LTW_ENG_20050322.0139	2	183	expire	expire	sections	section	Many sections of the Patriot Act	SUBJECT	1	YES	YES
RTE6-DEV	YES	d0d1a93e-f990-4085-872b-b0d42e63d271	D0922	NYT_ENG_20041026.0202	3	183	expire	expire	sections	section	Many sections of the Patriot Act	SUBJECT	11	YES	YES
RTE6-DEV	YES	ba0558c4-4db7-426c-bfe7-2d6b45cd58bc	D0922	NYT_ENG_20050322.0262	7	183	expire	expire	sections	section	Many sections of the Patriot Act	SUBJECT	11	YES	YES
RTE6-DEV	YES	1a4a4e9d-2cdc-4e58-aa6e-7fe066c69793	D0922	LTW_ENG_20050322.0139	5	184	renewal	renewal	Act	act	the Patriot Act	OBJECT	6	YES	YES
RTE6-DEV	YES	f5b43aad-6b1a-4e6d-86e4-2b58545df833	D0922	APW_ENG_20041025.0389	3	187	used	use	investigators	investigator	Justice Department investigators	SUBJECT	1	YES	YES
RTE6-DEV	YES	07fdef5d-2be7-4f96-ab29-deda25d91fa9	D0922	APW_ENG_20041025.0389	3	187	used	use	powers	power	powers	OBJECT	10	YES	YES
RTE6-DEV	YES	0e0a2243-55c5-4993-af42-f3570a2a647a	D0922	LTW_ENG_20050322.0139	9	188	predecessor	predecessor	Gonzales	gonzales	Alberto Gonzales	OBJECT	9	YES	NO
RTE6-DEV	YES	ebc65d80-6a49-4ddf-8853-4bfb2ade9fed	D0924	APW_ENG_20041101.0307	2	147	maker	maker	Vioxx	vioxx	Vioxx	OBJECT	1	YES	YES
RTE6-DEV	YES	83fa3b68-77cd-4dc7-b50a-24ada45ff726	D0924	NYT_ENG_20041006.0378	24	147	maker	maker	Vioxx	vioxx	Vioxx	OBJECT	24	NO	NO
RTE6-DEV	YES	fb99cba4-0d19-457f-8874-0bb0a45228e1	D0924	NYT_ENG_20041104.0279	1	147	maker	maker	Vioxx	vioxx	Vioxx	OBJECT	1	YES	YES
RTE6-DEV	YES	73793bfb-0b14-482d-a234-288d4ca06804	D0924	AFP_ENG_20041103.0497	1	151	approved	approve	Vioxx	vioxx	Vioxx	OBJECT	1	YES	YES
RTE6-DEV	YES	ac67cc8c-1272-4d62-9aa1-d8934591bee7	D0924	AFP_ENG_20041103.0497	1	151	approved	approve	FDA	fda	the FDA	SUBJECT	0	YES	YES
RTE6-DEV	YES	5e943598-9d67-4f1e-8ab2-37c654bfc696	D0924	AFP_ENG_20041001.0380	1	153	withdrew	withdraw	Vioxx	vioxx	Vioxx	OBJECT	1	YES	YES
RTE6-DEV	YES	3b0d860f-c634-4b97-a38f-5094fc9efdc3	D0924	AFP_ENG_20041001.0380	1	153	withdrew	withdraw	market	market	the market	OBJECT	5	YES	YES
RTE6-DEV	YES	4c46b024-f577-4a8e-bcf0-eed11127766c	D0924	AFP_ENG_20041001.0380	2	153	withdrew	withdraw	Merck	merck	Merck	SUBJECT	2	YES	NO
RTE6-DEV	YES	852fdde4-1795-4adf-b240-2c897533e1e0	D0924	AFP_ENG_20041001.0380	2	153	withdrew	withdraw	Vioxx	vioxx	Vioxx	OBJECT	2	YES	NO
RTE6-DEV	YES	a3bba6c1-5a38-4689-9619-3287574f0ea7	D0924	AFP_ENG_20041001.0380	2	153	withdrew	withdraw	market	market	the market	OBJECT	5	YES	NO
RTE6-DEV	YES	199a9a64-5be9-43a2-88fb-e8fe5c6c71d2	D0924	AFP_ENG_20041021.0497	1	153	withdrew	withdraw	Merck	merck	Merck	SUBJECT	1	YES	NO
RTE6-DEV	YES	33688d93-e184-4481-8f73-094cde04c6f0	D0924	AFP_ENG_20041021.0497	8	153	withdrew	withdraw	Merck	merck	Merck	SUBJECT	8	YES	NO
RTE6-DEV	YES	04cfd0a4-f613-4c32-b2c3-271fa9d16158	D0924	APW_ENG_20041021.0243	1	153	withdrew	withdraw	Merck	merck	Merck	SUBJECT	1	YES	NO
RTE6-DEV	YES	f031e279-9eef-4e49-8dba-91b0494b648f	D0924	APW_ENG_20041101.0307	7	153	withdrew	withdraw	market	market	the market	OBJECT	2	YES	NO
RTE6-DEV	YES	2a6c0c55-886f-4756-ba70-a87224614b11	D0924	NYT_ENG_20041004.0309	37	153	withdrew	withdraw	Merck	merck	Merck	SUBJECT	37	YES	NO
RTE6-DEV	YES	fbc40090-ebf3-4b59-ba1a-c7d3d0a8a47f	D0924	NYT_ENG_20041004.0309	37	153	withdrew	withdraw	Vioxx	vioxx	Vioxx	OBJECT	37	YES	NO
RTE6-DEV	YES	e2351f75-8bc0-4e6d-b177-9d2d5d7f0191	D0924	NYT_ENG_20041004.0309	37	153	withdrew	withdraw	market	market	the market	OBJECT	23	YES	NO
RTE6-DEV	YES	05b18b7a-5e4f-414c-8b31-f04f2a27ccdc	D0924	NYT_ENG_20041006.0378	47	153	withdrew	withdraw	Merck	merck	Merck	SUBJECT	47	YES	NO
RTE6-DEV	YES	ce673e77-00bb-4ba8-834d-b672239af723	D0924	NYT_ENG_20041006.0378	47	153	withdrew	withdraw	market	market	the market	OBJECT	40	YES	NO
RTE6-DEV	YES	660a189f-853a-464f-85d6-1fa51ca2f810	D0924	NYT_ENG_20041104.0279	35	153	withdrew	withdraw	market	market	the market	OBJECT	35	YES	NO
RTE6-DEV	YES	73998830-4f8a-4de9-97c4-9ce4550d66db	D0924	NYT_ENG_20041104.0279	43	153	withdrew	withdraw	Vioxx	vioxx	Vioxx	OBJECT	42	YES	YES
RTE6-DEV	YES	44175240-35f2-4684-9459-7a873881c187	D0924	NYT_ENG_20041104.0279	43	153	withdrew	withdraw	market	market	the market	OBJECT	35	YES	NO
RTE6-DEV	YES	21d4910e-4b8c-419d-96b6-1de8029bc09f	D0924	AFP_ENG_20041008.0499	3	154	pulled	pull	Merck	merck	Merck	SUBJECT	1	YES	YES
RTE6-DEV	YES	e1677549-5b0a-4964-b7b4-dfb77669c524	D0924	AFP_ENG_20041008.0499	3	154	pulled	pull	market	market	the market	OBJECT	1	YES	NO
RTE6-DEV	YES	8b0da7c1-b25c-4a8d-b51c-a262929462bf	D0924	APW_ENG_20041101.0307	2	154	pulled	pull	Vioxx	vioxx	Vioxx	OBJECT	1	YES	YES
RTE6-DEV	YES	13d5fc6c-e5fa-43e8-823a-4a7d71919af1	D0924	AFP_ENG_20041008.0499	3	155	increased	increase	risk	risk	the risk of heart attacks	OBJECT	3	YES	NO
RTE6-DEV	YES	e5fb9d60-7f34-4b64-bf85-1786ea0e4f22	D0924	AFP_ENG_20041021.0497	2	155	increased	increase	use	use	use of Vioxx	OBJECT	14	YES	NO
RTE6-DEV	YES	05e697bf-51cb-4469-a665-cd4166efc809	D0924	AFP_ENG_20041103.0497	10	155	found	find	use	use	use of Vioxx	OBJECT	10	YES	NO
RTE6-DEV	YES	fcc4f797-1caa-4818-8e3a-4e02c52bd4ca	D0924	AFP_ENG_20041103.0497	10	155	use	use	Vioxx	vioxx	Vioxx	OBJECT	10	YES	YES
RTE6-DEV	YES	48b718b0-0415-4984-a509-53c83f49c3e6	D0924	AFP_ENG_20041103.0497	4	155	increased	increase	use	use	use of Vioxx	OBJECT	9	YES	NO
RTE6-DEV	YES	16aebec8-dbb1-4c06-b40a-ed9321fd9bbf	D0924	AFP_ENG_20041103.0497	2	155	increased	increase	use	use	use of Vioxx	OBJECT	9	YES	NO
RTE6-DEV	YES	76f13b43-8358-410f-a821-c0e92a1ad874	D0924	AFP_ENG_20041103.0497	2	155	risk	risk	attacks	attack	heart attacks	UNKNOWN	1	YES	YES
RTE6-DEV	YES	707ee7a3-9d63-42a4-a42c-a535890d613f	D0924	AFP_ENG_20041103.0497	3	155	increased	increase	use	use	use of Vioxx	OBJECT	9	YES	NO
RTE6-DEV	YES	4accc43a-1b62-4193-a488-9b4abb081463	D0924	AFP_ENG_20041103.0497	3	155	risk	risk	attacks	attack	heart attacks	UNKNOWN	4	YES	NO
RTE6-DEV	YES	f26aec28-631b-4e8a-b711-496dfe772bd6	D0924	NYT_ENG_20041004.0309	23	155	use	use	Vioxx	vioxx	Vioxx	OBJECT	23	YES	YES
RTE6-DEV	YES	ef4dcdc1-f97e-4c44-be32-cc01b5966b9e	D0924	NYT_ENG_20041006.0378	5	155	increased	increase	risk	risk	the risk of heart attacks	OBJECT	5	YES	NO
RTE6-DEV	YES	6897a335-823a-4a8b-9b87-bfdedbdb3780	D0924	NYT_ENG_20041006.0378	5	155	increased	increase	use	use	use of Vioxx	OBJECT	5	YES	NO
RTE6-DEV	YES	c0aaf329-55a7-4df4-b2be-8e8a444ea6b4	D0924	NYT_ENG_20041006.0378	5	155	use	use	Vioxx	vioxx	Vioxx	OBJECT	5	YES	YES
RTE6-DEV	YES	9750e305-e5b3-4f03-b226-cac0d8261234	D0924	NYT_ENG_20041006.0378	23	155	risk	risk	attacks	attack	heart attacks	UNKNOWN	19	YES	NO
RTE6-DEV	YES	76eed5d7-50f0-4bc6-8c6b-831da4d06dcd	D0924	NYT_ENG_20041104.0279	7	155	increased	increase	use	use	use of Vioxx	OBJECT	17	YES	YES
RTE6-DEV	YES	d60f406e-4941-4000-9c29-fed7b0c3a235	D0924	AFP_ENG_20041008.0499	3	160	pull	pull	Merck	merck	Merck	SUBJECT	1	YES	YES
RTE6-DEV	YES	d74885c0-7a39-453a-a0f9-a1a8072aa308	D0924	AFP_ENG_20041008.0499	3	160	pull	pull	market	market	the market	OBJECT	1	YES	NO
RTE6-DEV	YES	8c91df8a-533e-4c8d-a7a9-64899a332eeb	D0924	NYT_ENG_20041006.0378	40	160	pull	pull	Merck	merck	Merck	SUBJECT	33	YES	NO
RTE6-DEV	YES	21a596b5-777e-4165-a48e-3b4e975a0b9d	D0924	NYT_ENG_20041006.0378	40	160	pull	pull	market	market	the market	OBJECT	40	YES	NO
RTE6-DEV	YES	12622882-723e-4a02-8631-db01a74214ca	D0924	APW_ENG_20041101.0307	19	163	price	price	Merck	merck	Merck	OBJECT	18	YES	NO
RTE6-DEV	YES	2bac3600-fc24-4f54-b011-a730ae067137	D0924	NYT_ENG_20041104.0279	12	164	concluded	conclude	Lancet	lancet	The Lancet	SUBJECT	12	YES	NO
RTE6-DEV	YES	ed491b94-53f4-4da9-9cb7-2dd95f4207d3	D0927	LTW_ENG_20050429.0144	2	243	announced	announce	Jennings	jennings	Peter Jennings	SUBJECT	1	YES	YES
RTE6-DEV	YES	d22da3d4-fa86-453a-9b7d-3a8e8be2dd6c	D0927	LTW_ENG_20050406.0036	1	281	diagnosed	diagnose	Jennings	jennings	Peter Jennings	OBJECT	1	YES	YES
RTE6-DEV	YES	abcd7e49-14de-46da-84bc-ff0279322d63	D0927	LTW_ENG_20050406.0036	25	281	diagnosed	diagnose	Jennings	jennings	Peter Jennings	OBJECT	25	YES	NO
RTE6-DEV	YES	d513c087-58a2-41d4-8aaa-a27b873d4121	D0927	LTW_ENG_20050406.0036	25	281	diagnosed	diagnose	cancer	cancer	lung cancer	OBJECT	24	YES	NO
RTE6-DEV	YES	a50c817c-d88b-4bfd-82ed-16003790e32b	D0927	LTW_ENG_20050406.0071	2	281	diagnosed	diagnose	Jennings	jennings	Peter Jennings	OBJECT	1	YES	YES
RTE6-DEV	YES	8bdefb2b-6dc8-439a-880e-65c0c9d50be6	D0927	LTW_ENG_20050406.0071	2	281	diagnosed	diagnose	cancer	cancer	lung cancer	OBJECT	1	YES	NO
RTE6-DEV	YES	99c89dab-6deb-4e47-b80b-92357923e960	D0927	LTW_ENG_20050429.0144	2	281	diagnosed	diagnose	Jennings	jennings	Peter Jennings	OBJECT	1	YES	YES
RTE6-DEV	YES	e1a26e94-0d5a-48b2-8bd9-b71590bfa1a2	D0927	LTW_ENG_20050429.0144	2	281	diagnosed	diagnose	cancer	cancer	lung cancer	OBJECT	1	YES	YES
RTE6-DEV	YES	813896c4-9917-40f4-a799-5609db8826c3	D0929	AFP_ENG_20050920.0664	4	9	pounded	pound	Islands	islands	the Florida Keys Islands	OBJECT	4	YES	NO
RTE6-DEV	YES	b71f0fb9-c513-40bf-a48b-ecfe7abbbef9	D0929	AFP_ENG_20050920.0614	11	10	barreled	barrel	Gulf	gulf	the Gulf of Mexico	OBJECT	11	NO	NO
RTE6-DEV	YES	8144b543-d029-4506-a59b-bd02ec89ffb4	D0929	AFP_ENG_20050920.0633	4	10	barreled	barrel	Gulf	gulf	the Gulf of Mexico	OBJECT	1	NO	NO
RTE6-DEV	YES	578f1d09-991d-4598-9244-d832a568cf45	D0929	AFP_ENG_20050920.0664	4	10	barreled	barrel	Rita	rita	Rita	SUBJECT	4	YES	NO
RTE6-DEV	YES	98ef851e-c228-451f-9b43-9783fd81164f	D0929	AFP_ENG_20050920.0633	3	11	declared	declare	state	state	A state of emergency	OBJECT	2	NO	NO
RTE6-DEV	YES	94e44e98-bfb7-4726-a57f-fe47853f6950	D0929	AFP_ENG_20050920.0413	2	13	threatened	threaten	Rita	rita	Rita	SUBJECT	2	YES	YES
RTE6-DEV	YES	4fb1727c-fa59-47b3-b1f4-e9463aac8226	D0929	AFP_ENG_20050920.0413	2	13	threatened	threaten	Orleans	orleans	New Orleans	OBJECT	2	YES	YES
RTE6-DEV	YES	8b4cb308-3900-4031-97f0-3396554c74ec	D0929	AFP_ENG_20050920.0630	0	13	threatened	threaten	Orleans	orleans	New Orleans	OBJECT	0	YES	NO
RTE6-DEV	YES	149e7109-0633-4be4-8a22-20d9920093c1	D0929	AFP_ENG_20050920.0630	1	13	threatened	threaten	Rita	rita	Rita	SUBJECT	1	YES	NO
RTE6-DEV	YES	8800a637-afd6-48da-a9fa-fd4ace700248	D0929	AFP_ENG_20050920.0630	1	13	threatened	threaten	Orleans	orleans	New Orleans	OBJECT	1	YES	NO
RTE6-DEV	YES	98be2ae6-388d-4fcc-9d77-62bb038a7983	D0937	APW_ENG_20060212.0608	14	267	peppered	pepper	Whittington	whittington	Harry M. Whittington	OBJECT	15	YES	YES
RTE6-DEV	YES	dfe5a1f9-6c40-410d-80bb-86d08998ee23	D0937	APW_ENG_20060212.0608	14	267	peppered	pepper	pellets	pellet	birdshot pellets	OBJECT	19	YES	NO
RTE6-DEV	YES	f307786d-b9f4-4ed8-be27-db74613233d6	D0937	NYT_ENG_20060213.0144	15	267	peppered	pepper	pellets	pellet	birdshot pellets	OBJECT	13	YES	NO
RTE6-DEV	YES	cafdf4d5-38a5-4a48-acb0-3207601c5156	D0937	AFP_ENG_20060213.0487	1	270	shot	shoot	Whittington	whittington	Harry M. Whittington	OBJECT	2	YES	YES
RTE6-DEV	YES	cd48d254-a4ab-47a8-928c-edc671ecaa00	D0937	AFP_ENG_20060213.0487	2	270	shot	shoot	Whittington	whittington	Harry M. Whittington	OBJECT	2	NO	NO
RTE6-DEV	YES	28eb95c2-e188-423e-a2e2-028f9d8c7350	D0937	AFP_ENG_20060213.0664	1	270	shot	shoot	Whittington	whittington	Harry M. Whittington	OBJECT	2	YES	YES
RTE6-DEV	YES	c31f8b7f-0899-4b7a-9106-c216d019c5ac	D0937	AFP_ENG_20060213.0664	20	270	shot	shoot	Whittington	whittington	Harry M. Whittington	OBJECT	20	YES	YES
RTE6-DEV	YES	4f35da7c-5114-4fe5-ba76-aca4f1e9e6f2	D0937	AFP_ENG_20060213.0664	20	270	shot	shoot	Cheney	cheney	Vice President Dick Cheney	SUBJECT	21	YES	YES
RTE6-DEV	YES	04429b45-cf7e-43d8-8d9d-34f6148c94dd	D0937	AFP_ENG_20060213.0741	1	270	shot	shoot	Whittington	whittington	Harry M. Whittington	OBJECT	5	YES	YES
RTE6-DEV	YES	3bb9e948-3189-4862-88a1-1089e8e69191	D0937	AFP_ENG_20060213.0741	1	270	shot	shoot	Cheney	cheney	Vice President Dick Cheney	SUBJECT	1	YES	YES
RTE6-DEV	YES	2a33db3d-50cf-43ff-a7a9-f69a29dd2c8e	D0937	AFP_ENG_20060213.0741	16	270	shot	shoot	Whittington	whittington	Harry M. Whittington	OBJECT	18	YES	YES
RTE6-DEV	YES	98e9c970-34d9-4206-b766-ba7917d65577	D0937	AFP_ENG_20060213.0741	16	270	shot	shoot	Cheney	cheney	Vice President Dick Cheney	SUBJECT	18	YES	YES
RTE6-DEV	YES	a6f1862e-d48f-4965-b2f2-d8154768d067	D0937	AFP_ENG_20060213.0741	20	270	shot	shoot	Whittington	whittington	Harry M. Whittington	OBJECT	20	YES	YES
RTE6-DEV	YES	32656884-5104-42c2-8c71-49553bc08b20	D0937	AFP_ENG_20060213.0741	20	270	shot	shoot	Cheney	cheney	Vice President Dick Cheney	SUBJECT	20	YES	NO
RTE6-DEV	YES	d2dc0da9-498a-4df0-a814-5899c976b0a3	D0937	APW_ENG_20060212.0608	0	270	shot	shoot	Whittington	whittington	Harry M. Whittington	OBJECT	2	YES	YES
RTE6-DEV	YES	766cd375-a224-4d69-aa57-f6e3b704a685	D0937	APW_ENG_20060212.0608	1	270	shot	shoot	Whittington	whittington	Harry M. Whittington	OBJECT	2	YES	YES
RTE6-DEV	YES	408a558a-5469-4253-9654-bd72bb4d2740	D0937	APW_ENG_20060212.0608	2	270	shot	shoot	Whittington	whittington	Harry M. Whittington	OBJECT	2	YES	YES
RTE6-DEV	YES	936e5fe5-4eb7-472d-8bfb-23f02661a594	D0937	LTW_ENG_20060212.0053	3	270	shot	shoot	Whittington	whittington	Harry M. Whittington	OBJECT	3	NO	NO
RTE6-DEV	YES	f57dae69-5e2c-4bd8-ae4b-b2f7ca450df9	D0937	LTW_ENG_20060213.0135	5	270	shot	shoot	Whittington	whittington	Harry M. Whittington	OBJECT	5	NO	NO
RTE6-DEV	YES	24c1f2a4-4c4a-4b83-a198-43dbc70e1c83	D0937	LTW_ENG_20060213.0135	5	270	shot	shoot	Cheney	cheney	Vice President Dick Cheney	SUBJECT	4	NO	NO
RTE6-DEV	YES	39595ddd-63c9-4715-9aad-276db1883451	D0937	LTW_ENG_20060213.0135	1	270	shot	shoot	Whittington	whittington	Harry M. Whittington	OBJECT	5	YES	YES
RTE6-DEV	YES	3255ce30-408c-4816-b256-0cb71eccd63f	D0937	LTW_ENG_20060213.0135	1	270	shot	shoot	Cheney	cheney	Vice President Dick Cheney	SUBJECT	1	YES	YES
RTE6-DEV	YES	394a023c-92ad-4300-9b9f-243ab7541304	D0937	NYT_ENG_20060212.0196	1	270	shot	shoot	Whittington	whittington	Harry M. Whittington	OBJECT	3	YES	YES
RTE6-DEV	YES	59a0daba-2dd4-47b5-9dc6-1f0b335ef840	D0937	NYT_ENG_20060212.0196	23	270	shot	shoot	Cheney	cheney	Vice President Dick Cheney	SUBJECT	23	YES	NO
RTE6-DEV	YES	df1041c3-abe5-4a8a-a912-bba347bb01b2	D0937	NYT_ENG_20060212.0196	25	270	shot	shoot	Cheney	cheney	Vice President Dick Cheney	SUBJECT	25	YES	NO
RTE6-DEV	YES	6970ed36-4e58-488e-b1c6-8986890db5f2	D0937	NYT_ENG_20060213.0144	1	270	shot	shoot	Whittington	whittington	Harry M. Whittington	OBJECT	10	YES	YES
RTE6-DEV	YES	18a74337-8ea7-406d-b2af-10b5ef05991e	D0937	NYT_ENG_20060213.0144	1	270	shot	shoot	Cheney	cheney	Vice President Dick Cheney	SUBJECT	1	YES	YES
RTE6-DEV	YES	5e7970a4-c66e-4793-891f-a05592d6d44e	D0937	NYT_ENG_20060213.0144	15	270	shot	shoot	Whittington	whittington	Harry M. Whittington	OBJECT	15	NO	NO
RTE6-DEV	YES	d4405173-0db3-4f9c-97a4-68caeb280913	D0937	NYT_ENG_20060213.0144	15	270	shot	shoot	Cheney	cheney	Vice President Dick Cheney	SUBJECT	15	YES	NO
RTE6-DEV	YES	69e46ff9-0420-487d-8226-f164036b3fd9	D0937	NYT_ENG_20060213.0144	3	270	shot	shoot	Whittington	whittington	Harry M. Whittington	OBJECT	10	YES	YES
RTE6-DEV	YES	1d0f71b4-af0d-44cc-a787-6628e2130180	D0937	NYT_ENG_20060213.0277	1	270	shot	shoot	Whittington	whittington	Harry M. Whittington	OBJECT	2	YES	NO
RTE6-DEV	YES	2e24a231-2faf-49dd-bd45-1060946188c1	D0937	NYT_ENG_20060213.0277	1	270	shot	shoot	Cheney	cheney	Vice President Dick Cheney	SUBJECT	1	YES	NO
RTE6-DEV	YES	60bbd40e-bd59-4a22-b8a0-ae3f4aa135b0	D0937	XIN_ENG_20060212.0242	1	270	shot	shoot	Whittington	whittington	Harry M. Whittington	OBJECT	2	YES	YES
RTE6-DEV	YES	45681d54-1345-4bcb-bca1-8d80859aa2be	D0937	AFP_ENG_20060213.0741	4	279	waited	wait	Cheney	cheney	Vice President Dick Cheney	SUBJECT	3	YES	YES
RTE6-DEV	YES	583ef432-72f9-453f-adc4-9b4299992fad	D0938	APW_ENG_20050106.0112	1	303	raise	raise	Foundation	foundation	The World Trade Center Memorial Foundation	SUBJECT	1	YES	NO
RTE6-DEV	YES	23ce3570-ad14-49dd-bcf0-2ce0bde23a90	D0938	AFP_ENG_20041122.0626	4	313	competition	competition	Memorial	memorial	the World Trade Center Memorial	UNKNOWN	3	YES	NO
RTE6-DEV	YES	a1565bc7-f137-45d2-a9d7-9d31da983c0d	D0938	AFP_ENG_20041122.0626	4	319	reflecting	reflect	twin	twin	twin	SUBJECT	5	NO	NO
RTE6-DEV	YES	3a6074ed-7b81-4626-944f-361c04290fe9	D0938	AFP_ENG_20041201.0756	7	319	reflecting	reflect	twin	twin	twin	SUBJECT	8	NO	NO
RTE6-DEV	YES	fbd6a280-f4e6-471e-b07d-79c38e288681	D0938	NYT_ENG_20041216.0211	5	320	mark	mark	pools	pool	The pools	SUBJECT	6	YES	YES
RTE6-DEV	NO	0e8125fd-baca-4667-88ac-3a992782f7d1	D0909	AFP_ENG_20050613.0282	3	199	leader	leader	Fein	fein	Sinn Fein	OBJECT	4	NO	NO
RTE6-DEV	NO	a7e55c99-bbb6-43b0-b9c8-3f5d0269e4b5	D0909	AFP_ENG_20050614.0518	10	199	leader	leader	Fein	fein	Sinn Fein	OBJECT	1	NO	NO
RTE6-DEV	NO	ef44722a-c232-461c-84ed-bc79056881c0	D0909	AFP_ENG_20050614.0518	5	204	ended	end	deal	deal	The 1998 Good Friday peace deal	SUBJECT	13	NO	NO
RTE6-DEV	NO	924de899-3a33-4181-8c0f-7ac5ed7e9016	D0909	AFP_ENG_20050614.0518	5	204	ended	end	years	years	30 years of violence	MODIFIER	14	NO	NO
RTE6-DEV	NO	dfb79985-ea56-4a2e-b18c-b18cd99bc597	D0909	AFP_ENG_20050627.0365	8	204	ended	end	deal	deal	The 1998 Good Friday peace deal	SUBJECT	13	NO	NO
RTE6-DEV	NO	262043b4-1c45-4e9d-b4aa-5037796a2247	D0909	AFP_ENG_20050627.0365	8	204	ended	end	years	years	30 years of violence	MODIFIER	13	NO	NO
RTE6-DEV	NO	22bb52ac-3b3f-44bb-8fad-c926261b13d0	D0909	AFP_ENG_20050629.0709	4	204	ended	end	deal	deal	The 1998 Good Friday peace deal	SUBJECT	2	NO	NO
RTE6-DEV	NO	3868a3e3-2c0e-47df-bcf3-4b68235783e0	D0909	AFP_ENG_20050722.0652	10	204	ended	end	deal	deal	The 1998 Good Friday peace deal	SUBJECT	11	NO	NO
RTE6-DEV	NO	de087260-b99a-4329-978c-42d0223f3425	D0909	AFP_ENG_20050722.0652	10	204	ended	end	years	years	30 years of violence	MODIFIER	11	NO	NO
RTE6-DEV	NO	573f39af-e177-448f-8d74-b629e8aa908d	D0909	AFP_ENG_20050723.0072	12	204	ended	end	deal	deal	The 1998 Good Friday peace deal	SUBJECT	11	NO	NO
RTE6-DEV	NO	8f400fdf-7670-4b34-89c7-9ddc3a398b9b	D0909	AFP_ENG_20050723.0072	12	204	ended	end	years	years	30 years of violence	MODIFIER	11	NO	NO
RTE6-DEV	NO	792b2cd9-1e1c-415b-9531-85138ef32855	D0909	AFP_ENG_20050613.0282	5	209	end	end	Blair	blair	Tony Blair	SUBJECT	2	NO	NO
RTE6-DEV	NO	d6725e59-ce40-4796-a185-a26da14122fd	D0909	AFP_ENG_20050614.0518	5	209	end	end	Blair	blair	Tony Blair	SUBJECT	9	NO	NO
RTE6-DEV	NO	8f3d37eb-dd9d-4cce-a969-8c38b7db1ef1	D0909	AFP_ENG_20050627.0365	13	209	end	end	campaign	campaign	its armed campaign	OBJECT	13	NO	NO
RTE6-DEV	NO	b7433a1e-86f0-42fe-8586-8fc9601376f4	D0909	AFP_ENG_20050627.0365	13	209	end	end	Blair	blair	Tony Blair	SUBJECT	9	NO	NO
RTE6-DEV	NO	dd83bac5-faea-4147-a510-55214edda7b2	D0909	AFP_ENG_20050627.0365	8	209	end	end	campaign	campaign	its armed campaign	OBJECT	13	NO	NO
RTE6-DEV	NO	0f721d6a-a642-4fb9-8d0d-9c868cdbff35	D0909	AFP_ENG_20050627.0365	8	209	end	end	Blair	blair	Tony Blair	SUBJECT	9	NO	NO
RTE6-DEV	NO	f9206036-e92a-49a6-bac8-a49fbe17595b	D0909	AFP_ENG_20050629.0709	4	209	end	end	Blair	blair	Tony Blair	SUBJECT	4	NO	NO
RTE6-DEV	NO	ac179115-d6f1-43ec-854d-498c545628c2	D0909	AFP_ENG_20050629.0709	4	209	welcomed	welcome	Blair	blair	Tony Blair	SUBJECT	4	NO	NO
RTE6-DEV	NO	e8ab8a49-02a3-4d8f-bad1-4de429b73515	D0909	AFP_ENG_20050722.0652	6	209	end	end	campaign	campaign	its armed campaign	OBJECT	6	NO	NO
RTE6-DEV	NO	b51f331a-32b5-4ca6-a5e5-1ef7377df055	D0909	AFP_ENG_20050722.0652	10	209	end	end	campaign	campaign	its armed campaign	OBJECT	6	NO	NO
RTE6-DEV	NO	c1118fa3-bea6-4246-a9b4-36d1df69b2fc	D0909	AFP_ENG_20050723.0072	11	209	end	end	campaign	campaign	its armed campaign	OBJECT	11	NO	NO
RTE6-DEV	NO	ae62f10d-739e-439b-bd4b-dd13bb33f3e4	D0909	AFP_ENG_20050723.0072	8	209	statement	statement	leadership	leadership	the Irish Republican Army leadership	SUBJECT	5	NO	NO
RTE6-DEV	NO	8d7bdff7-44cf-42d6-9cfa-a5ca2944a238	D0909	AFP_ENG_20050723.0072	12	209	end	end	campaign	campaign	its armed campaign	OBJECT	11	NO	NO
RTE6-DEV	NO	0d435abb-b8f1-4534-8535-d996b4b25502	D0909	AFP_ENG_20050613.0282	5	211	end	end	Army	army	The Irish Republican Army	SUBJECT	4	NO	NO
RTE6-DEV	NO	b47c8de4-7b15-4b4b-b9b0-33a4b7442e0e	D0909	AFP_ENG_20050614.0518	5	211	end	end	Army	army	The Irish Republican Army	SUBJECT	5	NO	NO
RTE6-DEV	NO	d181484b-7a1d-4582-842c-3043abf32da7	D0909	AFP_ENG_20050614.0518	11	211	ordered	order	Army	army	The Irish Republican Army	SUBJECT	5	NO	NO
RTE6-DEV	NO	ec13a916-ade0-4587-aae1-6836a37ca82e	D0909	AFP_ENG_20050627.0365	13	211	end	end	campaign	campaign	its armed campaign in Northern Ireland	OBJECT	13	NO	NO
RTE6-DEV	NO	a248ef48-9091-46fe-ac75-9f14cb819472	D0909	AFP_ENG_20050627.0365	13	211	end	end	Army	army	The Irish Republican Army	SUBJECT	7	NO	NO
RTE6-DEV	NO	d882d2f3-df25-4886-b83c-66f6a377e173	D0909	AFP_ENG_20050627.0365	8	211	end	end	campaign	campaign	its armed campaign in Northern Ireland	OBJECT	13	NO	NO
RTE6-DEV	NO	02fb4045-e6f4-4151-8d59-62583652ab0e	D0909	AFP_ENG_20050627.0365	8	211	end	end	Army	army	The Irish Republican Army	SUBJECT	7	YES	YES
RTE6-DEV	NO	32b01c89-0f18-4dfe-b28c-2e2e8b0a9c37	D0909	AFP_ENG_20050627.0365	3	211	ordered	order	Army	army	The Irish Republican Army	SUBJECT	7	NO	NO
RTE6-DEV	NO	7d0e5b28-60c9-4abf-aaea-1140a81748e7	D0909	AFP_ENG_20050629.0709	4	211	end	end	Army	army	The Irish Republican Army	SUBJECT	4	YES	NO
RTE6-DEV	NO	609b5c13-f885-4a4d-97d8-066551e559d6	D0909	AFP_ENG_20050629.0709	2	211	end	end	Army	army	The Irish Republican Army	SUBJECT	4	NO	NO
RTE6-DEV	NO	4200f861-b53f-46a6-9768-1b83ae516b45	D0909	AFP_ENG_20050722.0652	6	211	end	end	campaign	campaign	its armed campaign in Northern Ireland	OBJECT	6	NO	NO
RTE6-DEV	NO	952e0e37-142d-42cd-87ce-c4d8bf3b3f1d	D0909	AFP_ENG_20050722.0652	6	211	end	end	Army	army	The Irish Republican Army	SUBJECT	1	NO	NO
RTE6-DEV	NO	1723b125-19f4-4459-9176-466ea8b71875	D0909	AFP_ENG_20050722.0652	10	211	end	end	campaign	campaign	its armed campaign in Northern Ireland	OBJECT	6	NO	NO
RTE6-DEV	NO	cb2db81a-0982-4802-a796-2ef392e6d15f	D0909	AFP_ENG_20050722.0652	10	211	end	end	Army	army	The Irish Republican Army	SUBJECT	1	YES	YES
RTE6-DEV	NO	3338c475-ecc2-473a-b774-4b93e57b3a47	D0909	AFP_ENG_20050723.0072	11	211	end	end	campaign	campaign	its armed campaign in Northern Ireland	OBJECT	11	NO	NO
RTE6-DEV	NO	6637e2fd-3f32-42f9-b636-ca18fb14525b	D0909	AFP_ENG_20050723.0072	11	211	end	end	Army	army	The Irish Republican Army	SUBJECT	2	NO	NO
RTE6-DEV	NO	fc313ce0-21d3-4890-aa00-61d5f22309ea	D0909	AFP_ENG_20050723.0072	12	211	end	end	campaign	campaign	its armed campaign in Northern Ireland	OBJECT	11	NO	NO
RTE6-DEV	NO	4fa3d833-718f-418e-9328-b12e31c291c2	D0909	AFP_ENG_20050723.0072	12	211	end	end	Army	army	The Irish Republican Army	SUBJECT	2	YES	YES
RTE6-DEV	NO	f9485ed2-d3ee-4795-893b-7e9f79d5a422	D0909	AFP_ENG_20050613.0282	1	212	agreed	agree	Army	army	The Irish Republican Army	SUBJECT	4	YES	YES
RTE6-DEV	NO	08c2058d-2f35-472e-b26c-9435849dd3ea	D0909	AFP_ENG_20050627.0365	2	212	agreed	agree	Army	army	The Irish Republican Army	SUBJECT	7	NO	NO
RTE6-DEV	NO	80a3d38c-e5f6-4418-ab59-8a2b99135ba7	D0909	AFP_ENG_20050722.0652	9	212	agreed	agree	Army	army	The Irish Republican Army	SUBJECT	1	NO	NO
RTE6-DEV	NO	b1475f9a-280d-4a2d-89f1-005568ebb422	D0909	APW_ENG_20050615.0538	0	212	agreed	agree	Army	army	The Irish Republican Army	SUBJECT	3	NO	NO
RTE6-DEV	NO	6c0402fc-d4a6-4fd2-94ec-e4a483eb576b	D0909	APW_ENG_20050615.0538	1	212	agreed	agree	Army	army	The Irish Republican Army	SUBJECT	3	NO	NO
RTE6-DEV	NO	93508363-a164-4725-8121-63a9c1ee5d95	D0909	AFP_ENG_20050629.0709	4	214	made	make	to	to	to the Irish Republican Army	MODIFIER	4	NO	NO
RTE6-DEV	NO	c3795650-b76f-4692-a63d-744b37442180	D0909	AFP_ENG_20050722.0652	1	214	embrace	embrace	activity	activity	purely democratic activity	OBJECT	10	NO	NO
RTE6-DEV	NO	447e38ec-8c33-4655-ab8d-058864954674	D0909	AFP_ENG_20050722.0652	1	214	embrace	embrace	Adams	adams	Gerry Adams	SUBJECT	4	YES	NO
RTE6-DEV	NO	b955adf1-57ea-4a89-a4f4-f50c4e28493d	D0909	APW_ENG_20050618.0396	2	214	made	make	appeal	appeal	a direct appeal	OBJECT	1	YES	YES
RTE6-DEV	NO	e17582ca-ed29-4718-abf6-4df9943ff8d7	D0909	APW_ENG_20050618.0396	2	214	made	make	to	to	to the Irish Republican Army	MODIFIER	1	YES	NO
RTE6-DEV	NO	394ca756-487d-4e08-bed7-547934860548	D0909	AFP_ENG_20050627.0365	0	216	take	take	Adams	adams	Gerry Adams	SUBJECT	7	NO	NO
RTE6-DEV	NO	9e348232-d2c7-4139-a8e0-824b275db1e8	D0909	AFP_ENG_20050629.0709	5	216	urged	urge	Army	army	the Irish Republican Army	OBJECT	4	YES	YES
RTE6-DEV	NO	b7745a5a-76e8-41ac-9fa9-38f4d2c13386	D0909	AFP_ENG_20050627.0365	15	217	destroyed	destroy	agreement	agreement	an agreement	OBJECT	14	NO	NO
RTE6-DEV	NO	ed4b15c4-6545-4352-982e-7af75a582db8	D0909	AFP_ENG_20050722.0652	12	217	destroyed	destroy	agreement	agreement	an agreement	OBJECT	9	NO	NO
RTE6-DEV	NO	3af6f0a6-28f7-4c2b-9e75-1190208aee7a	D0909	AFP_ENG_20050614.0518	1	221	denies	deny	Adams	adams	Gerry Adams	SUBJECT	1	NO	NO
RTE6-DEV	NO	f02ad286-f5ce-43bf-a1e6-91e141e19e88	D0909	APW_ENG_20050618.0396	5	221	denies	deny	reports	report	reports	OBJECT	6	NO	NO
RTE6-DEV	NO	016eb887-f453-401c-b375-441afa16a709	D0912	APW_ENG_20050807.0002	2	74	killed	kill	Sheehan	sheehan	Casey Sheehan	OBJECT	3	NO	NO
RTE6-DEV	NO	58ce18df-f8d6-4d95-8970-8a262b82fad2	D0912	APW_ENG_20050807.0002	2	74	killed	kill	Iraq	iraq	Iraq	OBJECT	1	NO	NO
RTE6-DEV	NO	879f06d3-26a0-4db8-84a2-4b21f8e5dc07	D0912	APW_ENG_20050807.0002	3	74	killed	kill	Sheehan	sheehan	Casey Sheehan	OBJECT	3	NO	NO
RTE6-DEV	NO	d3c8b6ae-133f-493f-b7ce-343b08932b9d	D0912	APW_ENG_20050807.0002	3	74	killed	kill	Iraq	iraq	Iraq	OBJECT	1	NO	NO
RTE6-DEV	NO	d79b7724-1186-4138-8db3-750326177079	D0912	APW_ENG_20050807.0569	10	74	killed	kill	Sheehan	sheehan	Casey Sheehan	OBJECT	10	NO	NO
RTE6-DEV	NO	24e5c9b2-2a2a-479e-8052-dc89538da753	D0912	APW_ENG_20050807.0569	8	74	killed	kill	Sheehan	sheehan	Casey Sheehan	OBJECT	10	NO	NO
RTE6-DEV	NO	47ef873d-7b5e-4019-8704-e75dedefec1d	D0912	APW_ENG_20050807.0569	8	74	killed	kill	Iraq	iraq	Iraq	OBJECT	10	YES	NO
RTE6-DEV	NO	9e385f78-4d2e-4e11-bacc-d37c5f77c353	D0912	APW_ENG_20050807.0569	9	74	killed	kill	Sheehan	sheehan	Casey Sheehan	OBJECT	10	NO	NO
RTE6-DEV	NO	7a65648f-0c22-400c-bdfc-9c7ec8e31876	D0912	APW_ENG_20050807.0569	9	74	killed	kill	Iraq	iraq	Iraq	OBJECT	10	YES	NO
RTE6-DEV	NO	3394c57d-9132-4038-8aa2-75943e503395	D0912	APW_ENG_20050807.0569	7	74	killed	kill	Sheehan	sheehan	Casey Sheehan	OBJECT	10	NO	NO
RTE6-DEV	NO	bdbe8bfe-6b25-4f90-83ad-58e79b32ed0f	D0912	APW_ENG_20050807.0569	7	74	killed	kill	Iraq	iraq	Iraq	OBJECT	5	YES	NO
RTE6-DEV	NO	26b2c96e-de68-4a57-b988-fca9e5b460c1	D0912	APW_ENG_20050811.0108	4	74	killed	kill	Sheehan	sheehan	Casey Sheehan	OBJECT	3	NO	NO
RTE6-DEV	NO	974ded90-e0d4-44eb-914d-0e5fc7272c13	D0912	APW_ENG_20050811.0108	4	74	killed	kill	Iraq	iraq	Iraq	OBJECT	1	YES	NO
RTE6-DEV	NO	5092c1ff-fee0-41f1-a522-103152de3321	D0912	APW_ENG_20050811.0720	6	74	killed	kill	Sheehan	sheehan	Casey Sheehan	OBJECT	4	NO	NO
RTE6-DEV	NO	7d8c5784-7546-450d-bde2-99f17232e2ec	D0912	APW_ENG_20050811.0720	6	74	killed	kill	Iraq	iraq	Iraq	OBJECT	3	YES	NO
RTE6-DEV	NO	833bdcd1-bd58-44b2-a6e4-d02cc4ae99ec	D0912	LTW_ENG_20050806.0052	11	74	killed	kill	Sheehan	sheehan	Casey Sheehan	OBJECT	10	NO	NO
RTE6-DEV	NO	ff76cdfc-902c-4340-9c44-8f41a5d9cd61	D0912	LTW_ENG_20050811.0138	8	74	killed	kill	Sheehan	sheehan	Casey Sheehan	OBJECT	8	NO	NO
RTE6-DEV	NO	7891b41c-216f-43c8-b483-a064efe98919	D0912	LTW_ENG_20050811.0138	20	74	killed	kill	Sheehan	sheehan	Casey Sheehan	OBJECT	21	YES	NO
RTE6-DEV	NO	0765e875-1217-4b7e-8345-3429c3dff715	D0912	LTW_ENG_20050811.0138	12	74	killed	kill	Sheehan	sheehan	Casey Sheehan	OBJECT	9	NO	NO
RTE6-DEV	NO	7abcb09e-51da-4d54-9959-6e835370fc59	D0912	LTW_ENG_20050811.0138	12	74	killed	kill	Iraq	iraq	Iraq	OBJECT	11	YES	YES
RTE6-DEV	NO	323c432f-5e29-43f5-b8bc-f89113d63fee	D0912	APW_ENG_20050807.0569	11	76	death	death	son	son	her son 's	SUBJECT	13	NO	NO
RTE6-DEV	NO	662f747e-2ffa-4128-8dec-1529f8530114	D0912	LTW_ENG_20050806.0052	6	76	seeking	seek	Sheehan	sheehan	Cindy Sheehan	SUBJECT	6	YES	YES
RTE6-DEV	NO	6677bab5-427a-4d4e-adf1-98d153c59407	D0912	LTW_ENG_20050811.0138	2	76	death	death	son	son	her son 's	SUBJECT	1	YES	NO
RTE6-DEV	NO	b096d320-7d28-4534-9416-ee7d97adb457	D0912	LTW_ENG_20050811.0138	3	76	death	death	son	son	her son 's	SUBJECT	1	YES	NO
RTE6-DEV	NO	68009c6c-27b0-4626-9aec-0381a74a6edf	D0912	LTW_ENG_20050811.0138	5	76	death	death	son	son	her son 's	SUBJECT	1	YES	NO
RTE6-DEV	NO	d62f70fe-315d-4696-9d45-556d8706f6a9	D0912	APW_ENG_20050807.0569	6	78	set	set	Sheehan	sheehan	Cindy Sheehan	SUBJECT	3	NO	NO
RTE6-DEV	NO	5639d911-7c2b-416b-a6b8-c1f5aef73dd3	D0912	APW_ENG_20050807.0569	6	78	set	set	vigil	vigil	a vigil near President Bush 's ranch	OBJECT	1	NO	NO
RTE6-DEV	NO	497542d4-cf52-426b-9e9e-3a165789f46c	D0912	APW_ENG_20050807.0002	1	81	met	meet	Sheehan	sheehan	Cindy Sheehan	SUBJECT	3	YES	YES
RTE6-DEV	NO	6100f2b3-dca1-4342-90d5-3e81e2458a8f	D0912	APW_ENG_20050807.0002	27	81	met	meet	Sheehan	sheehan	Cindy Sheehan	SUBJECT	20	NO	NO
RTE6-DEV	NO	cce52f73-bf46-4adf-82f1-051e4e31386d	D0912	APW_ENG_20050807.0002	27	81	met	meet	Bush	bush	Bush	OBJECT	25	YES	YES
RTE6-DEV	NO	44cb6671-baab-43bd-a4d3-a28728d4a665	D0912	APW_ENG_20050807.0002	26	81	met	meet	Sheehan	sheehan	Cindy Sheehan	SUBJECT	20	NO	NO
RTE6-DEV	NO	faa9f473-25d4-4a56-a5a1-9dbc56790609	D0912	APW_ENG_20050807.0002	26	81	met	meet	Bush	bush	Bush	OBJECT	25	YES	YES
RTE6-DEV	NO	7866625d-e63b-4dba-b5d2-310b463d36ca	D0912	APW_ENG_20050811.0108	10	81	met	meet	Sheehan	sheehan	Cindy Sheehan	SUBJECT	10	YES	NO
RTE6-DEV	NO	0df19c6f-f918-4f4f-ad5a-d0fa4f1cbcec	D0912	APW_ENG_20050811.0108	10	81	met	meet	Bush	bush	Bush	OBJECT	9	NO	NO
RTE6-DEV	NO	c2d42ecb-ceb3-45b7-8237-0e49a912cc16	D0912	APW_ENG_20050811.0241	0	81	met	meet	Sheehan	sheehan	Cindy Sheehan	SUBJECT	13	NO	NO
RTE6-DEV	NO	b2def2de-a7e8-4540-bc78-ce3771b6ad71	D0912	APW_ENG_20050811.0241	0	81	met	meet	Bush	bush	Bush	OBJECT	0	YES	NO
RTE6-DEV	NO	7bbe3502-8a69-421c-8b36-93bcf793abc2	D0912	LTW_ENG_20050806.0052	1	81	met	meet	Sheehan	sheehan	Cindy Sheehan	SUBJECT	1	YES	YES
RTE6-DEV	NO	709b8fa1-2eb6-4436-bdbe-bd67a60aeba0	D0912	LTW_ENG_20050806.0052	1	81	met	meet	Bush	bush	Bush	OBJECT	1	NO	NO
RTE6-DEV	NO	8ebf8f82-2318-4c2a-a3d2-9ec8a5a41281	D0912	LTW_ENG_20050806.0052	11	81	met	meet	Sheehan	sheehan	Cindy Sheehan	SUBJECT	10	NO	NO
RTE6-DEV	NO	5e389fa6-f293-4c55-90e1-bce21c1bc2ee	D0912	LTW_ENG_20050806.0052	6	81	met	meet	Sheehan	sheehan	Cindy Sheehan	SUBJECT	6	YES	YES
RTE6-DEV	NO	0e9bec5a-dc6f-4dd2-958a-21f3f76e329d	D0912	LTW_ENG_20050806.0052	20	81	met	meet	Sheehan	sheehan	Cindy Sheehan	SUBJECT	19	YES	YES
RTE6-DEV	NO	66335842-e948-470b-b5f6-89ef449cf33c	D0912	LTW_ENG_20050810.0126	12	81	met	meet	Sheehan	sheehan	Cindy Sheehan	SUBJECT	11	NO	NO
RTE6-DEV	NO	f78898f5-3310-4884-8f49-7f8ed6b0e617	D0912	LTW_ENG_20050810.0126	12	81	met	meet	June	june	June 2004	OBJECT	13	YES	NO
RTE6-DEV	NO	7c8e1536-1e89-49cc-8e25-daad8639e073	D0912	LTW_ENG_20050810.0126	58	81	met	meet	Sheehan	sheehan	Cindy Sheehan	SUBJECT	59	NO	NO
RTE6-DEV	NO	c0ee2edc-eb39-40fd-a956-5efbd9bc6eee	D0912	LTW_ENG_20050810.0126	58	81	met	meet	Bush	bush	Bush	OBJECT	52	NO	NO
RTE6-DEV	NO	8defb5d5-1884-472a-80af-e08744441ce0	D0912	LTW_ENG_20050810.0126	58	81	met	meet	June	june	June 2004	OBJECT	13	NO	NO
RTE6-DEV	NO	ffb82ad0-0fb6-484c-81f5-1955844614e5	D0912	LTW_ENG_20050811.0096	3	81	met	meet	Sheehan	sheehan	Cindy Sheehan	SUBJECT	3	YES	YES
RTE6-DEV	NO	1b8ec0e5-5e84-4ae5-a502-aac77027085a	D0912	LTW_ENG_20050811.0138	25	81	met	meet	Sheehan	sheehan	Cindy Sheehan	SUBJECT	25	YES	YES
RTE6-DEV	NO	7388fb00-314d-4106-baf0-d8b399f77c77	D0912	LTW_ENG_20050811.0138	27	81	met	meet	Sheehan	sheehan	Cindy Sheehan	SUBJECT	27	YES	YES
RTE6-DEV	NO	83dd4529-cc28-46c5-a764-c2971775143f	D0912	LTW_ENG_20050811.0138	2	81	met	meet	Sheehan	sheehan	Cindy Sheehan	SUBJECT	2	NO	NO
RTE6-DEV	NO	d0afb3a2-6de6-4cd4-8f64-60aa3460dc54	D0912	LTW_ENG_20050811.0138	2	81	met	meet	Bush	bush	Bush	OBJECT	2	YES	NO
RTE6-DEV	NO	d7e43b3b-5ec8-4464-b20f-1b5a62c2cb32	D0912	LTW_ENG_20050811.0138	7	81	met	meet	Sheehan	sheehan	Cindy Sheehan	SUBJECT	8	NO	NO
RTE6-DEV	NO	e7a1e015-ba99-4318-870c-15d585751a0b	D0912	LTW_ENG_20050811.0138	23	81	met	meet	Sheehan	sheehan	Cindy Sheehan	SUBJECT	22	YES	YES
RTE6-DEV	NO	96847899-a38f-4285-b0de-bba6aa6c73fe	D0912	LTW_ENG_20050811.0138	23	81	met	meet	Bush	bush	Bush	OBJECT	23	YES	NO
RTE6-DEV	NO	b98249de-8f8f-4bcc-a331-0d0593ffc774	D0912	NYT_ENG_20050806.0235	6	81	met	meet	Sheehan	sheehan	Cindy Sheehan	SUBJECT	6	YES	YES
RTE6-DEV	NO	f7c5bef2-af83-47b1-b6ee-b1d531cddcf5	D0912	NYT_ENG_20050806.0235	6	81	met	meet	Bush	bush	Bush	OBJECT	4	NO	NO
RTE6-DEV	NO	d92f1126-f9ee-49d0-843a-7c40bba240c6	D0912	NYT_ENG_20050806.0235	3	81	met	meet	Sheehan	sheehan	Cindy Sheehan	SUBJECT	2	YES	YES
RTE6-DEV	NO	ddbadd4a-cab3-435b-bca6-53bcc7a6074e	D0912	NYT_ENG_20050806.0235	3	81	met	meet	Bush	bush	Bush	OBJECT	2	NO	NO
RTE6-DEV	NO	33707f7b-eae7-486f-b1ff-272a9607546f	D0912	NYT_ENG_20050806.0235	10	81	met	meet	Sheehan	sheehan	Cindy Sheehan	SUBJECT	9	YES	YES
RTE6-DEV	NO	11858076-2fc7-41c9-8b26-5de4f81ce6ef	D0912	NYT_ENG_20050806.0235	1	81	met	meet	Sheehan	sheehan	Cindy Sheehan	SUBJECT	2	YES	YES
RTE6-DEV	NO	1592e765-02dd-4b7c-b889-d1f1d4a09569	D0912	NYT_ENG_20050806.0235	1	81	met	meet	Bush	bush	Bush	OBJECT	1	NO	NO
RTE6-DEV	NO	7f81cd26-09de-4fea-8d1e-e3241d00f6be	D0912	APW_ENG_20050807.0002	18	83	protesters	protester	war	war	war	OBJECT	1	YES	NO
RTE6-DEV	NO	5688a4f1-e923-476b-bd45-e08a99f151e6	D0912	APW_ENG_20050807.0002	1	83	protesters	protester	war	war	war	OBJECT	1	YES	NO
RTE6-DEV	NO	14082f24-b511-4115-acdb-440f75e7106a	D0912	APW_ENG_20050811.0108	19	83	protesters	protester	war	war	war	OBJECT	24	YES	NO
RTE6-DEV	NO	dfe0ae5c-3054-41b3-9bcc-62c949289d91	D0912	APW_ENG_20050811.0108	8	83	protesters	protester	war	war	war	OBJECT	24	YES	NO
RTE6-DEV	NO	e4bfef58-3739-4bb4-ab20-673754a521fa	D0912	APW_ENG_20050811.0720	30	83	protesters	protester	war	war	war	OBJECT	28	YES	NO
RTE6-DEV	NO	17772753-8193-4118-b5a0-d380f276b146	D0912	APW_ENG_20050811.0720	24	83	protesters	protester	war	war	war	OBJECT	28	YES	NO
RTE6-DEV	NO	c55eba86-3e14-4f42-82ba-dc6638fad302	D0912	LTW_ENG_20050810.0126	32	83	protesters	protester	war	war	war	OBJECT	33	YES	NO
RTE6-DEV	NO	3de269f3-e40a-43c7-870c-c4c239e1dcca	D0912	LTW_ENG_20050811.0096	1	83	protesters	protester	war	war	war	OBJECT	3	YES	NO
RTE6-DEV	NO	b2848f70-7918-43a2-bf48-ab750310e739	D0912	LTW_ENG_20050811.0096	8	83	protesters	protester	war	war	war	OBJECT	3	YES	NO
RTE6-DEV	NO	637725aa-f7d6-437a-a662-d05a4bbff321	D0912	LTW_ENG_20050811.0138	16	83	protesters	protester	war	war	war	OBJECT	13	YES	NO
RTE6-DEV	NO	20732eb4-d1de-4b02-b008-ab5cfc059912	D0912	LTW_ENG_20050811.0138	8	83	protesters	protester	war	war	war	OBJECT	7	YES	NO
RTE6-DEV	NO	0c91febc-fc89-4ae8-b81f-a4d98c72fe25	D0912	LTW_ENG_20050811.0138	7	83	protesters	protester	war	war	war	OBJECT	7	YES	NO
RTE6-DEV	NO	0c9cd305-1335-4d4d-b01c-2907a3cca6b5	D0912	NYT_ENG_20050806.0235	5	83	protesters	protester	war	war	war	OBJECT	2	YES	NO
RTE6-DEV	NO	794fd89c-8e99-4b6d-8702-d616ef2ffa49	D0912	APW_ENG_20050807.0002	1	84	protest	protest	Sheehan	sheehan	Cindy Sheehan	SUBJECT	3	YES	YES
RTE6-DEV	NO	00bd90bb-01b1-4a7f-9a51-433a2a2f5e16	D0912	APW_ENG_20050807.0002	0	84	protest	protest	Sheehan	sheehan	Cindy Sheehan	SUBJECT	3	YES	YES
RTE6-DEV	NO	98ef901a-e5bc-46c3-9526-92917c288fa3	D0912	APW_ENG_20050807.0002	18	84	protest	protest	Sheehan	sheehan	Cindy Sheehan	SUBJECT	17	NO	NO
RTE6-DEV	NO	f1c41588-fead-497f-9f92-3eaf249be6b8	D0912	APW_ENG_20050807.0569	22	84	protest	protest	Sheehan	sheehan	Cindy Sheehan	SUBJECT	22	YES	YES
RTE6-DEV	NO	6e255b66-ef83-4380-91b6-191923456e94	D0912	APW_ENG_20050807.0569	3	84	protest	protest	Sheehan	sheehan	Cindy Sheehan	SUBJECT	3	YES	YES
RTE6-DEV	NO	a2b28f9c-c004-440a-98aa-3c6fbaa39164	D0912	APW_ENG_20050811.0108	0	84	protest	protest	Sheehan	sheehan	Cindy Sheehan	SUBJECT	3	YES	YES
RTE6-DEV	NO	4ed4b478-2d2b-4742-9ac6-bd29b04750b4	D0912	APW_ENG_20050811.0108	19	84	protest	protest	Sheehan	sheehan	Cindy Sheehan	SUBJECT	19	NO	NO
RTE6-DEV	NO	9c544fc6-8f8d-4402-b6cd-638fbc10f27f	D0912	APW_ENG_20050811.0241	13	84	protest	protest	Sheehan	sheehan	Cindy Sheehan	SUBJECT	13	YES	NO
RTE6-DEV	NO	0066a5e3-64bf-4094-8731-22f2f9d8833b	D0912	APW_ENG_20050811.0720	0	84	protest	protest	Sheehan	sheehan	Cindy Sheehan	SUBJECT	1	YES	YES
RTE6-DEV	NO	9a248de6-eebc-4343-99c2-016bfea5adab	D0912	APW_ENG_20050811.0720	30	84	protest	protest	Sheehan	sheehan	Cindy Sheehan	SUBJECT	29	NO	NO
RTE6-DEV	NO	7f265b5c-5722-4777-84d7-19fe39ba5f92	D0912	LTW_ENG_20050806.0052	0	84	protest	protest	Sheehan	sheehan	Cindy Sheehan	SUBJECT	1	YES	YES
RTE6-DEV	NO	9d08826e-e565-4ee1-af99-af19bfb048f0	D0912	LTW_ENG_20050806.0052	16	84	protest	protest	Sheehan	sheehan	Cindy Sheehan	SUBJECT	16	YES	NO
RTE6-DEV	NO	f17cebfc-85a1-49fd-9da9-38bf77ec9113	D0912	LTW_ENG_20050810.0126	59	84	protest	protest	Sheehan	sheehan	Cindy Sheehan	SUBJECT	59	NO	NO
RTE6-DEV	NO	c19bda12-7d5c-42b1-9c98-cda371a47bb2	D0912	LTW_ENG_20050811.0096	1	84	protest	protest	Sheehan	sheehan	Cindy Sheehan	SUBJECT	1	YES	YES
RTE6-DEV	NO	b79dbb13-f4d4-40b5-8847-7cba843beed0	D0912	LTW_ENG_20050811.0096	7	84	protest	protest	Sheehan	sheehan	Cindy Sheehan	SUBJECT	6	YES	YES
RTE6-DEV	NO	41666cc7-7233-468a-b334-2e9fb407df79	D0912	LTW_ENG_20050811.0096	0	84	protest	protest	Sheehan	sheehan	Cindy Sheehan	SUBJECT	1	YES	YES
RTE6-DEV	NO	d293ce0b-fee3-4a10-a01a-4b315a650dd9	D0912	LTW_ENG_20050811.0096	8	84	protest	protest	Sheehan	sheehan	Cindy Sheehan	SUBJECT	8	YES	YES
RTE6-DEV	NO	5a302cc3-63f3-40e1-9a5e-b8ef44c01c7e	D0912	LTW_ENG_20050811.0096	5	84	protest	protest	Sheehan	sheehan	Cindy Sheehan	SUBJECT	4	YES	YES
RTE6-DEV	NO	8acbd5b0-781b-4e0d-8e91-7a929d424e7b	D0912	LTW_ENG_20050811.0138	16	84	protest	protest	Sheehan	sheehan	Cindy Sheehan	SUBJECT	21	NO	NO
RTE6-DEV	NO	485b5049-bf90-4ff0-8ffc-1819396b533f	D0912	NYT_ENG_20050806.0235	0	84	protest	protest	Sheehan	sheehan	Cindy Sheehan	SUBJECT	2	YES	YES
RTE6-DEV	NO	c756aec3-5efc-4867-8493-67d64b74f04d	D0912	NYT_ENG_20050806.0235	1	84	protest	protest	Sheehan	sheehan	Cindy Sheehan	SUBJECT	2	YES	YES
RTE6-DEV	NO	5b846d55-5ab9-4a25-9225-47277a6ed13a	D0912	APW_ENG_20050807.0002	1	89	met	meet	Sheehan	sheehan	Cindy Sheehan	SUBJECT	3	YES	YES
RTE6-DEV	NO	1d62f6cf-0521-4aed-82c3-7f556ac4bd0d	D0912	APW_ENG_20050807.0002	27	89	met	meet	Sheehan	sheehan	Cindy Sheehan	SUBJECT	20	NO	NO
RTE6-DEV	NO	6c0a51e7-8130-4d6f-be6c-aae3da844819	D0912	APW_ENG_20050807.0002	26	89	met	meet	Sheehan	sheehan	Cindy Sheehan	SUBJECT	20	NO	NO
RTE6-DEV	NO	2eda3f43-1bba-4f70-9e64-960f45fd8dfa	D0912	APW_ENG_20050807.0569	15	89	met	meet	Sheehan	sheehan	Cindy Sheehan	SUBJECT	15	YES	YES
RTE6-DEV	NO	9f1a96bc-36f2-40a8-aa13-c299d843e205	D0912	APW_ENG_20050811.0108	12	89	met	meet	Sheehan	sheehan	Cindy Sheehan	SUBJECT	12	YES	YES
RTE6-DEV	NO	3f7242be-f63f-43d6-b48b-2bf0d0b1e599	D0912	APW_ENG_20050811.0108	12	89	met	meet	officials	official	2 Bush administration officials	OBJECT	9	NO	NO
RTE6-DEV	NO	d17cf9e2-a524-4cf8-a980-544303041bac	D0912	APW_ENG_20050811.0108	10	89	met	meet	Sheehan	sheehan	Cindy Sheehan	SUBJECT	10	YES	NO
RTE6-DEV	NO	e2e77588-247a-49ea-aab7-ad868afa1266	D0912	APW_ENG_20050811.0108	10	89	met	meet	officials	official	2 Bush administration officials	OBJECT	9	YES	NO
RTE6-DEV	NO	69e1fe20-2113-45f7-a60b-2eea4e6cdb16	D0912	APW_ENG_20050811.0241	0	89	met	meet	Sheehan	sheehan	Cindy Sheehan	SUBJECT	13	NO	NO
RTE6-DEV	NO	9c6c051e-69f8-4094-95c3-4a43dcc86288	D0912	APW_ENG_20050811.0241	0	89	met	meet	officials	official	2 Bush administration officials	OBJECT	17	NO	NO
RTE6-DEV	NO	501b80cc-99fa-48b5-b2bb-121c39ea6dfa	D0912	LTW_ENG_20050806.0052	2	89	met	meet	Sheehan	sheehan	Cindy Sheehan	SUBJECT	2	YES	NO
RTE6-DEV	NO	8a555e29-b913-4ebf-9678-c6f6c5b4d081	D0912	LTW_ENG_20050806.0052	2	89	met	meet	officials	official	2 Bush administration officials	OBJECT	2	NO	NO
RTE6-DEV	NO	7403bca8-b4d6-46fb-a592-43cf61c30c52	D0912	LTW_ENG_20050806.0052	11	89	met	meet	Sheehan	sheehan	Cindy Sheehan	SUBJECT	10	NO	NO
RTE6-DEV	NO	7a211c41-4781-41e5-8e2d-99ff6e1407ac	D0912	LTW_ENG_20050806.0052	11	89	met	meet	officials	official	2 Bush administration officials	OBJECT	2	NO	NO
RTE6-DEV	NO	075e9602-5f35-4a1b-95e5-a587379ec80a	D0912	LTW_ENG_20050810.0126	12	89	met	meet	Sheehan	sheehan	Cindy Sheehan	SUBJECT	11	NO	NO
RTE6-DEV	NO	024d98c9-4f62-4b6f-844b-b80b55357022	D0912	LTW_ENG_20050810.0126	58	89	met	meet	Sheehan	sheehan	Cindy Sheehan	SUBJECT	59	NO	NO
RTE6-DEV	NO	d14bf28d-c0bc-432c-86aa-a9efe392a7f5	D0912	LTW_ENG_20050811.0096	3	89	met	meet	Sheehan	sheehan	Cindy Sheehan	SUBJECT	3	YES	YES
RTE6-DEV	NO	8b2ee2b5-c6e5-4774-89d0-474c14254fa6	D0912	LTW_ENG_20050811.0138	22	89	met	meet	officials	official	2 Bush administration officials	OBJECT	27	NO	NO
RTE6-DEV	NO	206bc435-71ac-48d4-94ec-f8237f936741	D0912	LTW_ENG_20050811.0138	27	89	met	meet	Sheehan	sheehan	Cindy Sheehan	SUBJECT	27	YES	YES
RTE6-DEV	NO	7db86e4b-4d0e-4d92-a47f-fa89dece52c0	D0912	LTW_ENG_20050811.0138	27	89	met	meet	officials	official	2 Bush administration officials	OBJECT	27	NO	NO
RTE6-DEV	NO	28bdc6e2-c617-464c-8e91-ea90f80e73cf	D0912	LTW_ENG_20050811.0138	2	89	met	meet	Sheehan	sheehan	Cindy Sheehan	SUBJECT	2	NO	NO
RTE6-DEV	NO	04290d55-6968-4cc3-a5bb-f83a9d6a527f	D0912	LTW_ENG_20050811.0138	2	89	met	meet	officials	official	2 Bush administration officials	OBJECT	27	NO	NO
RTE6-DEV	NO	1d19af37-43d5-4d50-9f04-3a4233fc2a35	D0912	LTW_ENG_20050811.0138	7	89	met	meet	Sheehan	sheehan	Cindy Sheehan	SUBJECT	8	NO	NO
RTE6-DEV	NO	95b6973d-1b72-491a-a41f-c33ec7107b15	D0912	LTW_ENG_20050811.0138	7	89	met	meet	officials	official	2 Bush administration officials	OBJECT	27	NO	NO
RTE6-DEV	NO	bafbc7d6-3a7c-4203-91c6-955205c1f464	D0912	NYT_ENG_20050806.0235	10	89	met	meet	Sheehan	sheehan	Cindy Sheehan	SUBJECT	9	YES	YES
RTE6-DEV	NO	850376cc-6c74-49e2-a691-4e17edeed26b	D0912	NYT_ENG_20050806.0235	3	89	met	meet	Sheehan	sheehan	Cindy Sheehan	SUBJECT	2	YES	YES
RTE6-DEV	NO	1e03f0c0-b093-4048-87c6-7a30d72df522	D0912	NYT_ENG_20050806.0235	3	89	met	meet	officials	official	2 Bush administration officials	OBJECT	1	NO	NO
RTE6-DEV	NO	097a53e5-b070-4f5a-b471-676f6fdca1d5	D0912	APW_ENG_20050807.0002	1	97	protesters	protester	war	war	war	OBJECT	1	YES	NO
RTE6-DEV	NO	dc7f8674-db05-4545-b2ff-967a44b94223	D0912	APW_ENG_20050807.0002	18	97	protesters	protester	war	war	war	OBJECT	1	YES	NO
RTE6-DEV	NO	e7e81041-e5aa-4fd9-bb75-1dbbb00ff2cf	D0912	APW_ENG_20050811.0108	8	97	protesters	protester	war	war	war	OBJECT	24	YES	NO
RTE6-DEV	NO	f9ab41bf-d996-4906-9375-c0ab3ecf838f	D0912	APW_ENG_20050811.0108	0	97	protesters	protester	war	war	war	OBJECT	24	YES	NO
RTE6-DEV	NO	0275f9c1-de60-442c-a587-dfd5010f49f7	D0912	APW_ENG_20050811.0108	19	97	protesters	protester	war	war	war	OBJECT	24	YES	NO
RTE6-DEV	NO	45c292c7-a8b9-4981-8f92-7402e6bb2c92	D0912	APW_ENG_20050811.0108	4	97	use	use	protesters	protester	war protesters	SUBJECT	8	NO	NO
RTE6-DEV	NO	31923d56-64b8-4af0-8922-a2f971368fdd	D0912	APW_ENG_20050811.0720	30	97	protesters	protester	war	war	war	OBJECT	28	YES	NO
RTE6-DEV	NO	cac774a9-6b42-4baf-ac8f-7b5d95fc5c38	D0912	APW_ENG_20050811.0720	24	97	protesters	protester	war	war	war	OBJECT	28	YES	NO
RTE6-DEV	NO	adbcc50c-9d7a-40e1-a9f5-d7777848b642	D0912	APW_ENG_20050811.0720	6	97	use	use	protesters	protester	war protesters	SUBJECT	24	NO	NO
RTE6-DEV	NO	e9397bf1-2740-49ab-bed5-eb54a52d4940	D0912	LTW_ENG_20050811.0096	1	97	protesters	protester	war	war	war	OBJECT	3	YES	NO
RTE6-DEV	NO	8a40bf20-3340-4756-ad80-ae1b895ac006	D0912	LTW_ENG_20050811.0138	7	97	protesters	protester	war	war	war	OBJECT	7	YES	NO
RTE6-DEV	NO	0f7c34d8-577d-4c04-8919-0c51801c577a	D0912	LTW_ENG_20050811.0138	16	97	protesters	protester	war	war	war	OBJECT	13	YES	NO
RTE6-DEV	NO	fa16b2c6-2e92-43e5-a368-c3ff2e8ef8e4	D0912	LTW_ENG_20050811.0138	8	97	protesters	protester	war	war	war	OBJECT	7	YES	NO
RTE6-DEV	NO	2a5ec793-7824-48a4-93b4-4f85451be81a	D0912	NYT_ENG_20050806.0235	1	97	protesters	protester	war	war	war	OBJECT	0	YES	NO
RTE6-DEV	NO	0f649d92-cbf0-4692-a43d-3267b647f9b6	D0912	NYT_ENG_20050806.0235	5	97	protesters	protester	war	war	war	OBJECT	2	YES	NO
RTE6-DEV	NO	a1ea3076-c477-4279-9180-ca184effa668	D0912	APW_ENG_20050807.0002	1	99	protest	protest	Sheehan	sheehan	Cindy Sheehan	UNKNOWN	3	YES	YES
RTE6-DEV	NO	cd2d8e13-0f91-45bb-b2d0-81db5e26859a	D0912	APW_ENG_20050807.0002	0	99	protest	protest	Sheehan	sheehan	Cindy Sheehan	UNKNOWN	3	YES	NO
RTE6-DEV	NO	10443958-286c-4795-8fef-cf8aee7ccbe0	D0912	APW_ENG_20050807.0569	3	99	protest	protest	Sheehan	sheehan	Cindy Sheehan	UNKNOWN	3	YES	NO
RTE6-DEV	NO	b542781d-9d4b-47b4-af3a-eb4e973778ab	D0912	APW_ENG_20050807.0569	22	99	protest	protest	Sheehan	sheehan	Cindy Sheehan	UNKNOWN	22	YES	YES
RTE6-DEV	NO	33840f55-2ce2-42bd-8636-c9fe2ce647d8	D0912	APW_ENG_20050811.0108	2	99	joined	join	protest	protest	Cindy Sheehan protest	OBJECT	0	YES	NO
RTE6-DEV	NO	5512ce27-4ed2-4cf3-9004-d3c9f8457be3	D0912	APW_ENG_20050811.0108	0	99	protest	protest	Sheehan	sheehan	Cindy Sheehan	UNKNOWN	3	YES	YES
RTE6-DEV	NO	27d06aad-cef8-4796-a6ba-7372766582ea	D0912	APW_ENG_20050811.0241	13	99	protest	protest	Sheehan	sheehan	Cindy Sheehan	UNKNOWN	13	YES	NO
RTE6-DEV	NO	13760a5d-5939-4e2b-801f-d0d4ea0baed5	D0912	APW_ENG_20050811.0720	11	99	joined	join	protest	protest	Cindy Sheehan protest	OBJECT	15	YES	YES
RTE6-DEV	NO	28ca568e-fc0f-4cd1-ac4b-ab594b22efa7	D0912	APW_ENG_20050811.0720	0	99	protest	protest	Sheehan	sheehan	Cindy Sheehan	UNKNOWN	1	YES	YES
RTE6-DEV	NO	34152736-5621-4a9b-a4b8-96d83b7f1bc5	D0912	APW_ENG_20050811.0720	2	99	joined	join	protest	protest	Cindy Sheehan protest	OBJECT	0	NO	NO
RTE6-DEV	NO	45a76204-7ca9-403d-80f8-66e20b8c677f	D0912	LTW_ENG_20050806.0052	0	99	protest	protest	Sheehan	sheehan	Cindy Sheehan	UNKNOWN	1	YES	YES
RTE6-DEV	NO	263e0c4f-3a75-4b12-802e-6310163ab7d7	D0912	LTW_ENG_20050806.0052	16	99	protest	protest	Sheehan	sheehan	Cindy Sheehan	UNKNOWN	16	YES	NO
RTE6-DEV	NO	4858e78f-5cc7-49e4-86cb-8ee6268c6d73	D0912	LTW_ENG_20050810.0126	59	99	protest	protest	Sheehan	sheehan	Cindy Sheehan	UNKNOWN	59	NO	NO
RTE6-DEV	NO	a9ddc423-3cfc-418a-8113-19b133b8353f	D0912	LTW_ENG_20050810.0126	55	99	joined	join	protest	protest	Cindy Sheehan protest	OBJECT	59	NO	NO
RTE6-DEV	NO	c8486412-c584-4b65-a66b-657e9aefea51	D0912	LTW_ENG_20050811.0096	1	99	joined	join	protest	protest	Cindy Sheehan protest	OBJECT	1	NO	NO
RTE6-DEV	NO	ff543fd8-e640-4524-8e58-d41aa53e0277	D0912	LTW_ENG_20050811.0096	1	99	protest	protest	Sheehan	sheehan	Cindy Sheehan	UNKNOWN	1	YES	YES
RTE6-DEV	NO	8a278a60-a986-4103-bddb-5aac6771dc4b	D0912	LTW_ENG_20050811.0096	5	99	protest	protest	Sheehan	sheehan	Cindy Sheehan	UNKNOWN	4	YES	YES
RTE6-DEV	NO	ab6c16ac-5e06-4ecd-a567-04f4990e9930	D0912	LTW_ENG_20050811.0096	7	99	protest	protest	Sheehan	sheehan	Cindy Sheehan	UNKNOWN	6	YES	YES
RTE6-DEV	NO	ed69de38-febc-4143-b664-4b913f0d3b7c	D0912	LTW_ENG_20050811.0096	0	99	protest	protest	Sheehan	sheehan	Cindy Sheehan	UNKNOWN	1	YES	YES
RTE6-DEV	NO	1d4e44f5-7b96-4f17-9409-f3fe6cbc683b	D0912	LTW_ENG_20050811.0138	8	99	joined	join	protest	protest	Cindy Sheehan protest	OBJECT	26	YES	NO
RTE6-DEV	NO	6f74b56b-7ac2-40d6-af53-af6af4da75b3	D0912	LTW_ENG_20050811.0138	8	99	protest	protest	Sheehan	sheehan	Cindy Sheehan	UNKNOWN	8	YES	NO
RTE6-DEV	NO	e30bb3b6-2649-4c2c-834f-0a24f0240738	D0912	LTW_ENG_20050811.0138	16	99	protest	protest	Sheehan	sheehan	Cindy Sheehan	UNKNOWN	21	NO	NO
RTE6-DEV	NO	6e0ea23a-174e-4f39-ba64-aed54985c0bc	D0912	LTW_ENG_20050811.0138	7	99	protest	protest	Sheehan	sheehan	Cindy Sheehan	UNKNOWN	8	NO	NO
RTE6-DEV	NO	b90d75b6-6a6a-4aa5-9a4d-bd9fbd073039	D0912	NYT_ENG_20050806.0235	0	99	protest	protest	Sheehan	sheehan	Cindy Sheehan	UNKNOWN	2	YES	YES
RTE6-DEV	NO	e962d063-73ad-4cc0-9dad-d40a210da39e	D0912	NYT_ENG_20050806.0235	1	99	protest	protest	Sheehan	sheehan	Cindy Sheehan	UNKNOWN	2	YES	YES
RTE6-DEV	NO	1d490180-be97-4833-9f1c-294e5a1f9c74	D0912	APW_ENG_20050807.0002	1	100	meet	meet	Sheehan	sheehan	Cindy Sheehan	OBJECT	3	YES	YES
RTE6-DEV	NO	8a7371ce-5911-4a4f-8e2e-6f36a4fe7598	D0912	APW_ENG_20050807.0002	27	100	meet	meet	Sheehan	sheehan	Cindy Sheehan	OBJECT	20	NO	NO
RTE6-DEV	NO	3899ecae-8284-4be1-9318-7ab52a31fdc9	D0912	APW_ENG_20050807.0002	26	100	meet	meet	Sheehan	sheehan	Cindy Sheehan	OBJECT	20	NO	NO
RTE6-DEV	NO	1ac2220d-21d2-4630-90e0-5408eef4e403	D0912	APW_ENG_20050807.0569	15	100	meet	meet	Sheehan	sheehan	Cindy Sheehan	OBJECT	15	YES	YES
RTE6-DEV	NO	dd3a0ad0-f388-4fea-a700-a4c473627cad	D0912	APW_ENG_20050811.0108	21	100	meet	meet	Sheehan	sheehan	Cindy Sheehan	OBJECT	19	YES	NO
RTE6-DEV	NO	7db6fb17-5f17-49c6-883e-5fc769aa28a1	D0912	APW_ENG_20050811.0108	10	100	meet	meet	Sheehan	sheehan	Cindy Sheehan	OBJECT	10	YES	NO
RTE6-DEV	NO	42797619-0833-4c4c-b05b-93ec9cbcaf51	D0912	APW_ENG_20050811.0108	12	100	meet	meet	Sheehan	sheehan	Cindy Sheehan	OBJECT	12	YES	YES
RTE6-DEV	NO	a67727d1-da89-4643-a626-6ac923b2bfc6	D0912	APW_ENG_20050811.0241	1	100	defended	defend	Bush	bush	President Bush	SUBJECT	1	NO	NO
RTE6-DEV	NO	9f53e59b-0a04-4433-8a5f-1fad1072bf42	D0912	APW_ENG_20050811.0241	1	100	meet	meet	decision	decision	his decision	SUBJECT	4	NO	NO
RTE6-DEV	NO	a08da8fe-3d4d-45a3-af2b-4746c7d68950	D0912	APW_ENG_20050811.0241	1	100	meet	meet	Sheehan	sheehan	Cindy Sheehan	OBJECT	13	NO	NO
RTE6-DEV	NO	b7fc2947-397e-423f-a72d-47d5a62c317c	D0912	APW_ENG_20050811.0241	5	100	defended	defend	Bush	bush	President Bush	SUBJECT	5	NO	NO
RTE6-DEV	NO	7ad57544-0e96-461a-aa78-25e71487c445	D0912	APW_ENG_20050811.0241	22	100	defended	defend	Bush	bush	President Bush	SUBJECT	6	NO	NO
RTE6-DEV	NO	3f2a3704-b434-4858-94c6-d27b9e815c8b	D0912	APW_ENG_20050811.0241	0	100	defended	defend	Bush	bush	President Bush	SUBJECT	0	NO	NO
RTE6-DEV	NO	5f434e53-4b9c-4c58-9378-e453a2f8e678	D0912	APW_ENG_20050811.0241	0	100	meet	meet	decision	decision	his decision	SUBJECT	4	NO	NO
RTE6-DEV	NO	6ecfc0ec-8f96-4fe8-afac-2b435c14d32e	D0912	APW_ENG_20050811.0241	0	100	meet	meet	Sheehan	sheehan	Cindy Sheehan	OBJECT	13	NO	NO
RTE6-DEV	NO	16ebc42c-0bc5-44c3-8b2f-8989e4946590	D0912	LTW_ENG_20050806.0052	1	100	meet	meet	Sheehan	sheehan	Cindy Sheehan	OBJECT	1	YES	YES
RTE6-DEV	NO	c1b33763-03ad-4c06-80e2-7ef994a9bcd4	D0912	LTW_ENG_20050806.0052	20	100	meet	meet	Sheehan	sheehan	Cindy Sheehan	OBJECT	19	YES	YES
RTE6-DEV	NO	683b9733-f618-4452-a3b1-94514acfc0f2	D0912	LTW_ENG_20050806.0052	6	100	meet	meet	Sheehan	sheehan	Cindy Sheehan	OBJECT	6	YES	YES
RTE6-DEV	NO	2b6ffe6d-c5fb-471e-a271-ae32f8606028	D0912	LTW_ENG_20050810.0126	20	100	meet	meet	Sheehan	sheehan	Cindy Sheehan	OBJECT	19	YES	YES
RTE6-DEV	NO	76a89964-db2f-4a0f-92be-57a40c7105b3	D0912	LTW_ENG_20050811.0096	3	100	meet	meet	Sheehan	sheehan	Cindy Sheehan	OBJECT	3	YES	YES
RTE6-DEV	NO	2396292c-0089-4cf8-ad4f-e198d1dce8bd	D0912	LTW_ENG_20050811.0138	2	100	meet	meet	Sheehan	sheehan	Cindy Sheehan	OBJECT	2	NO	NO
RTE6-DEV	NO	03cf645c-5d3e-4ae0-b594-5d106c4f4239	D0912	LTW_ENG_20050811.0138	25	100	meet	meet	Sheehan	sheehan	Cindy Sheehan	OBJECT	25	YES	YES
RTE6-DEV	NO	2877657c-6df1-41cf-a8b9-fd5d6bfb2cf9	D0912	LTW_ENG_20050811.0138	27	100	meet	meet	Sheehan	sheehan	Cindy Sheehan	OBJECT	27	YES	YES
RTE6-DEV	NO	b8fea62e-146f-4356-82af-55035686af65	D0912	LTW_ENG_20050811.0138	9	100	meet	meet	Sheehan	sheehan	Cindy Sheehan	OBJECT	9	YES	YES
RTE6-DEV	NO	2beb3cb1-0987-45cd-8484-cd1d538e21a7	D0912	LTW_ENG_20050811.0138	7	100	defended	defend	Bush	bush	President Bush	SUBJECT	7	NO	NO
RTE6-DEV	NO	d852899b-cb33-48e0-b006-4e6e918d238f	D0912	LTW_ENG_20050811.0138	7	100	meet	meet	Sheehan	sheehan	Cindy Sheehan	OBJECT	8	NO	NO
RTE6-DEV	NO	467500ea-0748-4fd8-8a2e-9e3cda4ea208	D0912	NYT_ENG_20050806.0235	1	100	meet	meet	Sheehan	sheehan	Cindy Sheehan	OBJECT	2	YES	YES
RTE6-DEV	NO	598dc1b9-a140-4598-a58a-c5811892581d	D0912	APW_ENG_20050807.0002	27	101	heard	hear	to	to	to Crawford	MODIFIER	26	NO	NO
RTE6-DEV	NO	b8fd31af-2b60-42b4-8299-0efe6a288e6d	D0912	APW_ENG_20050807.0002	0	101	protest	protest	Sheehan	sheehan	Cindy Sheehan 's	SUBJECT	3	YES	YES
RTE6-DEV	NO	96fea135-d28d-481c-94e3-374feafb8365	D0912	APW_ENG_20050807.0002	5	101	heard	hear	to	to	to Crawford	MODIFIER	5	NO	NO
RTE6-DEV	NO	4407fa81-34cf-46df-8cf3-01deb51b8bcd	D0912	APW_ENG_20050807.0002	1	101	protest	protest	Sheehan	sheehan	Cindy Sheehan 's	SUBJECT	3	YES	YES
RTE6-DEV	NO	739bdbcb-70d2-4ead-8abd-120802179462	D0912	APW_ENG_20050807.0569	3	101	protest	protest	Sheehan	sheehan	Cindy Sheehan 's	SUBJECT	3	YES	NO
RTE6-DEV	NO	a8ad36a1-42e5-458e-89ac-877f7a9f2c00	D0912	APW_ENG_20050807.0569	22	101	protest	protest	Sheehan	sheehan	Cindy Sheehan 's	SUBJECT	22	YES	YES
RTE6-DEV	NO	cf06a0fa-8931-4a8d-a6f9-7cf4abcc2faf	D0912	APW_ENG_20050807.0569	21	101	heard	hear	to	to	to Crawford	MODIFIER	21	NO	NO
RTE6-DEV	NO	8741a696-dfa4-4147-9530-c00a592f9602	D0912	APW_ENG_20050811.0108	5	101	heard	hear	to	to	to Crawford	MODIFIER	4	NO	NO
RTE6-DEV	NO	4bb491f7-7dae-47c4-8389-dd860e5e6dee	D0912	APW_ENG_20050811.0108	0	101	protest	protest	Sheehan	sheehan	Cindy Sheehan 's	SUBJECT	3	YES	YES
RTE6-DEV	NO	cec20dab-d7f1-4469-a0d6-2de17b7681b4	D0912	APW_ENG_20050811.0241	13	101	protest	protest	Sheehan	sheehan	Cindy Sheehan 's	SUBJECT	13	YES	NO
RTE6-DEV	NO	fb695cff-a830-4c3c-88bd-380e0f144073	D0912	APW_ENG_20050811.0720	0	101	protest	protest	Sheehan	sheehan	Cindy Sheehan 's	SUBJECT	1	YES	YES
RTE6-DEV	NO	26443e5b-231f-4c06-b296-b1957c6715ca	D0912	APW_ENG_20050811.0720	26	101	join	join	protest	protest	Cindy Sheehan 's protest	OBJECT	15	YES	YES
RTE6-DEV	NO	a8108964-6621-4798-ac5a-869d955dac22	D0912	APW_ENG_20050811.0720	17	101	join	join	protest	protest	Cindy Sheehan 's protest	OBJECT	15	NO	NO
RTE6-DEV	NO	a827bfa7-ae40-4902-b1cd-9e25845e1905	D0912	APW_ENG_20050811.0720	31	101	heard	hear	to	to	to Crawford	MODIFIER	32	NO	NO
RTE6-DEV	NO	7479df9c-cc00-421e-aa61-85db18465941	D0912	APW_ENG_20050811.0720	7	101	heard	hear	to	to	to Crawford	MODIFIER	6	NO	NO
RTE6-DEV	NO	81ee00d4-2f63-411b-861e-100d2a0cd6af	D0912	LTW_ENG_20050806.0052	16	101	protest	protest	Sheehan	sheehan	Cindy Sheehan 's	SUBJECT	16	YES	NO
RTE6-DEV	NO	ca7be839-ff3a-4379-90c8-c3df3fa767a1	D0912	LTW_ENG_20050806.0052	0	101	protest	protest	Sheehan	sheehan	Cindy Sheehan 's	SUBJECT	1	YES	YES
RTE6-DEV	NO	5f0627fe-a80c-4a0b-8232-71fa509ecf3f	D0912	LTW_ENG_20050810.0126	55	101	coming	come	woman	woman	a woman	SUBJECT	56	NO	NO
RTE6-DEV	NO	1d4766da-8100-4f86-b259-27db08f17017	D0912	LTW_ENG_20050810.0126	55	101	join	join	protest	protest	Cindy Sheehan 's protest	OBJECT	59	NO	NO
RTE6-DEV	NO	010a9c02-b4b5-4d71-8733-e8195498c96b	D0912	LTW_ENG_20050810.0126	56	101	coming	come	woman	woman	a woman	SUBJECT	56	NO	NO
RTE6-DEV	NO	fb9eed02-5e76-4f52-9dd2-c28e4cc18354	D0912	LTW_ENG_20050810.0126	59	101	coming	come	woman	woman	a woman	SUBJECT	56	NO	NO
RTE6-DEV	NO	c275230e-16de-4aa9-aede-7f15da1f747d	D0912	LTW_ENG_20050810.0126	59	101	protest	protest	Sheehan	sheehan	Cindy Sheehan 's	SUBJECT	59	NO	NO
RTE6-DEV	NO	ee43818b-ac33-4545-9ef2-8ed1f3af5b3a	D0912	LTW_ENG_20050810.0126	60	101	join	join	protest	protest	Cindy Sheehan 's protest	OBJECT	59	NO	NO
RTE6-DEV	NO	fb48146f-a5e0-4e59-864d-e74e8d57ef22	D0912	LTW_ENG_20050811.0096	1	101	join	join	protest	protest	Cindy Sheehan 's protest	OBJECT	1	NO	NO
RTE6-DEV	NO	6bd2716e-ef54-414a-8421-197ff348fddc	D0912	LTW_ENG_20050811.0096	1	101	protest	protest	Sheehan	sheehan	Cindy Sheehan 's	SUBJECT	1	YES	YES
RTE6-DEV	NO	953592dc-6adb-4db3-afc6-983b79e633d7	D0912	LTW_ENG_20050811.0096	5	101	protest	protest	Sheehan	sheehan	Cindy Sheehan 's	SUBJECT	4	YES	YES
RTE6-DEV	NO	0934adf6-9934-4721-8ec7-bb0f506bcd89	D0912	LTW_ENG_20050811.0096	7	101	protest	protest	Sheehan	sheehan	Cindy Sheehan 's	SUBJECT	6	YES	YES
RTE6-DEV	NO	c0e4e00e-4997-4b44-8e7a-c7f7a954c9f0	D0912	LTW_ENG_20050811.0096	0	101	protest	protest	Sheehan	sheehan	Cindy Sheehan 's	SUBJECT	1	YES	YES
RTE6-DEV	NO	9660302b-9bec-467d-aa09-5cbef99027bd	D0912	LTW_ENG_20050811.0138	2	101	heard	hear	to	to	to Crawford	MODIFIER	2	NO	NO
RTE6-DEV	NO	5d22bcff-f825-4ede-b55e-810236fd1030	D0912	LTW_ENG_20050811.0138	8	101	join	join	protest	protest	Cindy Sheehan 's protest	OBJECT	26	YES	NO
RTE6-DEV	NO	c052d5cc-a2dd-461f-b593-31f80687aff4	D0912	LTW_ENG_20050811.0138	8	101	protest	protest	Sheehan	sheehan	Cindy Sheehan 's	SUBJECT	8	NO	NO
RTE6-DEV	NO	eb974526-1a2f-46cf-a126-42cbadca2edc	D0912	LTW_ENG_20050811.0138	16	101	protest	protest	Sheehan	sheehan	Cindy Sheehan 's	SUBJECT	21	NO	NO
RTE6-DEV	NO	0719a162-4e4a-4922-8247-66a127d59df6	D0912	NYT_ENG_20050806.0235	0	101	protest	protest	Sheehan	sheehan	Cindy Sheehan 's	SUBJECT	2	YES	YES
RTE6-DEV	NO	cb0d9c44-dcec-4268-8140-bae17b21e2b0	D0912	NYT_ENG_20050806.0235	1	101	protest	protest	Sheehan	sheehan	Cindy Sheehan 's	SUBJECT	2	YES	YES
RTE6-DEV	NO	c0103660-c529-4360-ba49-1a5c0dcf2953	D0914	AFP_ENG_20041007.0771	6	59	occurred	occur	blast	blast	A blast	SUBJECT	5	YES	YES
RTE6-DEV	NO	7d572dba-9a76-4016-8d09-13a687a29071	D0914	AFP_ENG_20041007.0771	6	59	occurred	occur	hotel	hotel	a hotel	OBJECT	3	YES	NO
RTE6-DEV	NO	d12cf769-a2d6-4214-b919-8b3e20871c1f	D0914	AFP_ENG_20041007.0771	6	59	occurred	occur	Taba	taba	Taba	OBJECT	3	YES	NO
RTE6-DEV	NO	873b41e9-05c5-4681-8719-f187be237d82	D0914	AFP_ENG_20041007.0837	4	59	occurred	occur	blast	blast	A blast	SUBJECT	8	YES	YES
RTE6-DEV	NO	0ce0bd0e-208d-4f4f-b77b-b9a8b764cff9	D0914	AFP_ENG_20041007.0837	4	59	occurred	occur	hotel	hotel	a hotel	OBJECT	2	YES	NO
RTE6-DEV	NO	e483001c-4343-4190-9d1e-5f8276eaeddd	D0914	AFP_ENG_20041007.0837	4	59	occurred	occur	Taba	taba	Taba	OBJECT	3	YES	NO
RTE6-DEV	NO	8137de9f-71ae-495a-aee1-0926a15aea8e	D0914	AFP_ENG_20041007.0861	4	59	occurred	occur	blast	blast	A blast	SUBJECT	0	YES	YES
RTE6-DEV	NO	0f749271-940a-4cbb-9800-39213a645b8d	D0914	AFP_ENG_20041007.0861	4	59	occurred	occur	hotel	hotel	a hotel	OBJECT	2	YES	NO
RTE6-DEV	NO	0dbb1d1c-f012-45b2-8666-b4c577a3408d	D0914	AFP_ENG_20041007.0861	4	59	occurred	occur	Taba	taba	Taba	OBJECT	3	YES	NO
RTE6-DEV	NO	7804fc6e-56c5-460f-87f0-4c7ecbde0a93	D0914	XIN_ENG_20041007.0328	8	59	occurred	occur	hotel	hotel	a hotel	OBJECT	5	NO	NO
RTE6-DEV	NO	cd787257-58ab-44ec-99d2-2e9cb2b9ca47	D0914	XIN_ENG_20041007.0328	8	59	occurred	occur	Taba	taba	Taba	OBJECT	7	NO	NO
RTE6-DEV	NO	8fee2c47-892f-4ae8-9931-52510f151bc6	D0914	AFP_ENG_20041007.0744	1	66	ripped	rip	bomb	bomb	A car bomb	SUBJECT	4	YES	YES
RTE6-DEV	NO	14f072d1-85dc-4f85-ab81-192cbdc3c650	D0914	AFP_ENG_20041007.0861	1	66	ripped	rip	hotel	hotel	a hotel on the Red Sea coast of Sinai	OBJECT	2	YES	NO
RTE6-DEV	NO	d6540a59-293d-41b6-a070-ff2362b6bba3	D0914	AFP_ENG_20041007.0771	7	68	attack	attack	tourists	tourist	Israeli tourists in Sinai	OBJECT	3	NO	NO
RTE6-DEV	NO	5944d1f2-61db-4d8f-9e70-6675a5a300af	D0914	AFP_ENG_20041007.0771	23	68	attack	attack	tourists	tourist	Israeli tourists in Sinai	OBJECT	22	YES	NO
RTE6-DEV	NO	9f9c320c-46a7-4a38-9066-063d240e6d1c	D0914	AFP_ENG_20041007.0803	11	68	attack	attack	tourists	tourist	Israeli tourists in Sinai	OBJECT	10	YES	NO
RTE6-DEV	NO	c18d92e4-c79a-4e3b-9eca-6085c4eb6a68	D0914	NYT_ENG_20041007.0255	45	68	attack	attack	tourists	tourist	Israeli tourists in Sinai	OBJECT	51	NO	NO
RTE6-DEV	NO	61dfb6c0-e477-471e-bcf6-8b94f8548abe	D0914	NYT_ENG_20041007.0255	41	68	attack	attack	tourists	tourist	Israeli tourists in Sinai	OBJECT	37	YES	NO
RTE6-DEV	NO	7c00c91e-7fa1-427e-8616-9e9ebc1bc9f5	D0914	NYT_ENG_20041007.0255	11	68	attack	attack	tourists	tourist	Israeli tourists in Sinai	OBJECT	37	YES	NO
RTE6-DEV	NO	d87c1470-221b-4161-8089-3dff8b6a3e3b	D0914	NYT_ENG_20041007.0255	44	69	targeted	target	Israelis	israelis	Israelis	OBJECT	44	YES	NO
RTE6-DEV	NO	d0d3b641-e626-4a93-9594-3bbabac433be	D0914	NYT_ENG_20041007.0255	24	70	vacationing	vacation	Israelis	israelis	Israelis	OBJECT	24	YES	NO
RTE6-DEV	NO	c22d50cc-a053-4400-bcee-0d044fe82a4d	D0914	XIN_ENG_20041007.0328	8	71	occurred	occur	explosions	explosion	The explosions	SUBJECT	5	NO	NO
RTE6-DEV	NO	fb6a8e8f-97f9-4004-8673-5cb94155cc4e	D0914	AFP_ENG_20041007.0744	2	72	killed	kill	people	people	At least 30 people	OBJECT	2	YES	NO
RTE6-DEV	NO	683578f2-2759-43c5-a769-343269a2b8a2	D0914	AFP_ENG_20041007.0744	2	72	killed	kill	blasts	blast	the blasts	OBJECT	2	YES	NO
RTE6-DEV	NO	87f92202-d54a-434a-b84b-024d5cbbc690	D0914	AFP_ENG_20041007.0744	3	72	killed	kill	people	people	At least 30 people	OBJECT	2	YES	NO
RTE6-DEV	NO	1ec683cf-7404-4569-9bb9-619c00e6083d	D0914	AFP_ENG_20041007.0744	1	72	killed	kill	blasts	blast	the blasts	OBJECT	1	YES	NO
RTE6-DEV	NO	2272afb6-879d-48a5-b646-3239c3ed2c64	D0914	AFP_ENG_20041007.0744	0	72	killed	kill	people	people	At least 30 people	OBJECT	1	YES	NO
RTE6-DEV	NO	a2475296-591d-46b8-be64-3dcef69b7a5d	D0914	AFP_ENG_20041007.0744	0	72	killed	kill	blasts	blast	the blasts	OBJECT	0	YES	NO
RTE6-DEV	NO	42cc7683-340c-40ef-aa08-3e853671d824	D0914	AFP_ENG_20041007.0769	2	72	killed	kill	people	people	At least 30 people	OBJECT	1	YES	NO
RTE6-DEV	NO	c34a8c2d-1117-4e46-bd0f-b307b4715971	D0914	AFP_ENG_20041007.0769	2	72	killed	kill	blasts	blast	the blasts	OBJECT	0	YES	NO
RTE6-DEV	NO	babcd432-d4dc-41ca-bb07-668420303bbd	D0914	AFP_ENG_20041007.0771	5	72	killed	kill	people	people	At least 30 people	OBJECT	4	YES	NO
RTE6-DEV	NO	e00bff05-988d-4997-b1d3-dd28a1568674	D0914	AFP_ENG_20041007.0837	2	72	killed	kill	people	people	At least 30 people	OBJECT	1	NO	NO
RTE6-DEV	NO	3155fc62-2e69-41bc-8f4c-23225cd274c2	D0914	AFP_ENG_20041007.0837	2	72	killed	kill	blasts	blast	the blasts	OBJECT	8	YES	NO
RTE6-DEV	NO	bfd5b45e-4049-4379-824e-e8b33cc64199	D0914	AFP_ENG_20041007.0861	2	72	killed	kill	people	people	At least 30 people	OBJECT	1	NO	NO
RTE6-DEV	NO	442e35ed-4c7e-4632-b8ac-f693f81418bc	D0914	AFP_ENG_20041007.0861	2	72	killed	kill	blasts	blast	the blasts	OBJECT	0	YES	NO
RTE6-DEV	NO	bf27980f-f6b9-4b66-8414-690a5bba361c	D0914	NYT_ENG_20041007.0255	51	72	killed	kill	blasts	blast	the blasts	OBJECT	61	NO	NO
RTE6-DEV	NO	6486049e-b4a2-475f-9c92-f405cc3b25bf	D0914	AFP_ENG_20041007.0744	2	73	killed	kill	blasts	blast	the blasts	OBJECT	2	YES	NO
RTE6-DEV	NO	883b1fd4-4a5e-43fd-a862-45221742f8dc	D0914	AFP_ENG_20041007.0744	0	73	killed	kill	blasts	blast	the blasts	OBJECT	0	YES	NO
RTE6-DEV	NO	3002c319-3093-4092-820c-c362c79aa8e6	D0914	AFP_ENG_20041007.0744	1	73	killed	kill	blasts	blast	the blasts	OBJECT	1	YES	NO
RTE6-DEV	NO	3eb876e7-4ebc-4a9d-822f-da52ef8ce00a	D0914	AFP_ENG_20041007.0769	2	73	killed	kill	blasts	blast	the blasts	OBJECT	0	YES	NO
RTE6-DEV	NO	b944c1ee-cd04-4705-a774-cbce27f57ac0	D0914	AFP_ENG_20041007.0769	1	73	killed	kill	blasts	blast	the blasts	OBJECT	0	YES	YES
RTE6-DEV	NO	90e53be0-b1e0-4f39-b7e9-db2ba5f250e2	D0914	AFP_ENG_20041007.0771	4	73	killed	kill	blasts	blast	the blasts	OBJECT	3	YES	YES
RTE6-DEV	NO	026ef877-3b76-4a66-bc87-2c9e21c68581	D0914	AFP_ENG_20041007.0786	3	73	killed	kill	blasts	blast	the blasts	OBJECT	1	YES	NO
RTE6-DEV	NO	7444231a-a774-4e9c-be91-210eef6ec7f1	D0914	AFP_ENG_20041007.0837	0	73	killed	kill	Egyptians	egyptians	12 Egyptians	OBJECT	9	YES	NO
RTE6-DEV	NO	d27f705f-bcbb-4511-bd8e-af6a4ab44082	D0914	AFP_ENG_20041007.0837	0	73	killed	kill	blasts	blast	the blasts	OBJECT	8	YES	NO
RTE6-DEV	NO	022e9afb-6459-43b1-8aaf-01490741a2ce	D0914	AFP_ENG_20041007.0837	2	73	killed	kill	Egyptians	egyptians	12 Egyptians	OBJECT	9	NO	NO
RTE6-DEV	NO	b79ed7d1-472e-443a-a1bf-b9b757dae33e	D0914	AFP_ENG_20041007.0837	2	73	killed	kill	blasts	blast	the blasts	OBJECT	8	YES	NO
RTE6-DEV	NO	fbd53989-397f-4cfb-8216-f809d6c7b14f	D0914	AFP_ENG_20041007.0861	0	73	killed	kill	blasts	blast	the blasts	OBJECT	0	YES	NO
RTE6-DEV	NO	c0b5efdc-4529-4190-a149-d26e92d6379f	D0914	AFP_ENG_20041007.0861	2	73	killed	kill	blasts	blast	the blasts	OBJECT	0	YES	NO
RTE6-DEV	NO	e25246f0-3ec7-4ec6-8ab6-24cd2d5bb315	D0914	NYT_ENG_20041007.0255	44	73	killed	kill	Egyptians	egyptians	12 Egyptians	OBJECT	48	NO	NO
RTE6-DEV	NO	f6b76adb-4a39-4c80-a56b-05a3e97a6b77	D0914	NYT_ENG_20041007.0255	44	73	killed	kill	blasts	blast	the blasts	OBJECT	33	NO	NO
RTE6-DEV	NO	ca752ff5-e33f-4424-9ad8-a056538a91ec	D0914	NYT_ENG_20041007.0255	51	73	killed	kill	Egyptians	egyptians	12 Egyptians	OBJECT	48	NO	NO
RTE6-DEV	NO	07608135-192d-47ae-ab06-70b81ed2c3bf	D0914	NYT_ENG_20041007.0255	51	73	killed	kill	blasts	blast	the blasts	OBJECT	61	NO	NO
RTE6-DEV	NO	c5d0ba37-9dd4-481b-bc52-58f6c5400b32	D0914	XIN_ENG_20041007.0328	1	73	killed	kill	blasts	blast	the blasts	OBJECT	2	YES	YES
RTE6-DEV	NO	036f547d-ba9b-4d42-887c-3e4cddbb5f22	D0914	AFP_ENG_20041007.0744	2	90	killed	kill	people	people	at least 35 people	OBJECT	2	YES	NO
RTE6-DEV	NO	d143a0e0-cfec-4af6-8cb7-d78a67dfc795	D0914	AFP_ENG_20041007.0744	2	90	killed	kill	blasts	blast	the blasts	OBJECT	2	YES	NO
RTE6-DEV	NO	50742835-74ae-41c2-b6ff-e631ba28c3d7	D0914	AFP_ENG_20041007.0744	3	90	killed	kill	people	people	at least 35 people	OBJECT	2	YES	NO
RTE6-DEV	NO	3c682cf5-ab91-4759-a391-d74c58c2ec44	D0914	AFP_ENG_20041007.0744	0	90	killed	kill	people	people	at least 35 people	OBJECT	1	YES	NO
RTE6-DEV	NO	9b48d7ae-aafc-43de-8782-380df98bc99f	D0914	AFP_ENG_20041007.0744	0	90	killed	kill	blasts	blast	the blasts	OBJECT	0	YES	NO
RTE6-DEV	NO	d7bc0814-be36-405e-a14e-e98eede2f5cd	D0914	AFP_ENG_20041007.0744	0	90	reported	report	Radio	radio	Israel Radio	SUBJECT	4	NO	NO
RTE6-DEV	NO	1837665f-5540-4807-9e9a-3f16bf7732c7	D0914	AFP_ENG_20041007.0744	1	90	killed	kill	blasts	blast	the blasts	OBJECT	1	YES	NO
RTE6-DEV	NO	b6b92300-05fd-4e48-b282-db04d00add9e	D0914	AFP_ENG_20041007.0769	1	90	killed	kill	blasts	blast	the blasts	OBJECT	0	YES	YES
RTE6-DEV	NO	1dbb8694-e800-4371-822c-4a0a51e0a0e4	D0914	AFP_ENG_20041007.0769	2	90	killed	kill	people	people	at least 35 people	OBJECT	1	YES	NO
RTE6-DEV	NO	246147bc-79e0-417a-9b61-f9d9540550a6	D0914	AFP_ENG_20041007.0769	2	90	killed	kill	blasts	blast	the blasts	OBJECT	0	YES	NO
RTE6-DEV	NO	ec8a5bda-3d0e-492d-9a29-7daf517cea8a	D0914	AFP_ENG_20041007.0771	4	90	killed	kill	blasts	blast	the blasts	OBJECT	3	YES	YES
RTE6-DEV	NO	d3ac2e53-9920-4e92-ae77-2360ffab4dd5	D0914	AFP_ENG_20041007.0771	0	90	killed	kill	people	people	at least 35 people	OBJECT	1	YES	NO
RTE6-DEV	NO	38a66cdb-5524-4b3d-be18-3ca633660b62	D0914	AFP_ENG_20041007.0771	5	90	killed	kill	people	people	at least 35 people	OBJECT	4	NO	NO
RTE6-DEV	NO	d9b19349-3161-43a4-a02d-db677ae42bf9	D0914	AFP_ENG_20041007.0771	5	90	reported	report	Radio	radio	Israel Radio	SUBJECT	11	NO	NO
RTE6-DEV	NO	848fd6e0-4edb-4841-a64b-8813a50e9351	D0914	AFP_ENG_20041007.0771	19	90	reported	report	Radio	radio	Israel Radio	SUBJECT	11	NO	NO
RTE6-DEV	NO	2e28c250-a1ae-416a-870e-15663fc3ee73	D0914	AFP_ENG_20041007.0786	3	90	killed	kill	blasts	blast	the blasts	OBJECT	1	YES	NO
RTE6-DEV	NO	b868e260-4849-4300-9df8-8415703e28ed	D0914	AFP_ENG_20041007.0803	0	90	killed	kill	people	people	at least 35 people	OBJECT	1	YES	NO
RTE6-DEV	NO	706b499b-f436-47c8-ab21-79b45dbec5d8	D0914	AFP_ENG_20041007.0803	8	90	reported	report	Radio	radio	Israel Radio	SUBJECT	3	NO	NO
RTE6-DEV	NO	f1c98f0a-661c-49c9-81ea-e0241e846d14	D0914	AFP_ENG_20041007.0803	12	90	killed	kill	people	people	at least 35 people	OBJECT	1	NO	NO
RTE6-DEV	NO	66e87ac7-d358-494d-8a40-40872baecc4c	D0914	AFP_ENG_20041007.0837	0	90	killed	kill	people	people	at least 35 people	OBJECT	1	YES	NO
RTE6-DEV	NO	b46d1851-1bb4-41b6-b6ae-215d246cd266	D0914	AFP_ENG_20041007.0837	0	90	killed	kill	blasts	blast	the blasts	OBJECT	8	YES	NO
RTE6-DEV	NO	196ff6e0-aeca-4d24-8fe6-1f17f6b5c4c4	D0914	AFP_ENG_20041007.0837	1	90	killed	kill	blasts	blast	the blasts	OBJECT	8	YES	YES
RTE6-DEV	NO	c67a4028-4c0f-47e4-8929-d6923c466794	D0914	AFP_ENG_20041007.0837	2	90	killed	kill	people	people	at least 35 people	OBJECT	1	NO	NO
RTE6-DEV	NO	6ba1863e-13b4-4428-a378-74b3565a3f3e	D0914	AFP_ENG_20041007.0837	2	90	killed	kill	blasts	blast	the blasts	OBJECT	8	YES	NO
RTE6-DEV	NO	dd0294ce-8f1e-46a5-8ad8-91f020e88acc	D0914	AFP_ENG_20041007.0837	20	90	killed	kill	people	people	at least 35 people	OBJECT	1	NO	NO
RTE6-DEV	NO	d1d94bc9-c725-497f-ae30-0dcaa6c658b8	D0914	AFP_ENG_20041007.0837	20	90	killed	kill	blasts	blast	the blasts	OBJECT	11	NO	NO
RTE6-DEV	NO	0b9801aa-3051-423e-9eb0-fb8635f7cc93	D0914	AFP_ENG_20041007.0861	0	90	killed	kill	people	people	at least 35 people	OBJECT	1	YES	NO
RTE6-DEV	NO	252873e9-352f-4150-9329-0e791dfcef65	D0914	AFP_ENG_20041007.0861	0	90	killed	kill	blasts	blast	the blasts	OBJECT	0	YES	NO
RTE6-DEV	NO	5b61a25c-64ef-4e8f-aa4b-d37a49e4cb8c	D0914	AFP_ENG_20041007.0861	1	90	killed	kill	blasts	blast	the blasts	OBJECT	0	YES	YES
RTE6-DEV	NO	4093003d-6efe-4a8f-a4b5-b242ad3f1a50	D0914	AFP_ENG_20041007.0861	2	90	killed	kill	people	people	at least 35 people	OBJECT	1	NO	NO
RTE6-DEV	NO	3073f2da-9efe-4f6b-8ccf-fe7dd37e682e	D0914	AFP_ENG_20041007.0861	2	90	killed	kill	blasts	blast	the blasts	OBJECT	0	YES	NO
RTE6-DEV	NO	9b052936-d123-4c3a-9c3a-effe36d9b1ce	D0914	AFP_ENG_20041007.0861	19	90	killed	kill	people	people	at least 35 people	OBJECT	1	NO	NO
RTE6-DEV	NO	c613616c-af9c-4f2e-97d9-4d4952c70d87	D0914	AFP_ENG_20041007.0861	19	90	killed	kill	blasts	blast	the blasts	OBJECT	13	NO	NO
RTE6-DEV	NO	439063d7-926c-4cf3-89c9-0da62d36042a	D0914	APW_ENG_20041007.0481	4	90	reported	report	Radio	radio	Israel Radio	SUBJECT	5	NO	NO
RTE6-DEV	NO	69246a95-d2b8-41f6-844c-4c500085bf9c	D0914	NYT_ENG_20041007.0255	1	90	killed	kill	blasts	blast	the blasts	OBJECT	2	YES	YES
RTE6-DEV	NO	c16225c5-d372-4371-b72e-e9c6ba10fc8b	D0914	NYT_ENG_20041007.0255	5	90	reported	report	Radio	radio	Israel Radio	SUBJECT	14	NO	NO
RTE6-DEV	NO	4ca66c9c-ef8f-497c-931a-20c2a8bba292	D0914	NYT_ENG_20041007.0255	51	90	killed	kill	blasts	blast	the blasts	OBJECT	61	NO	NO
RTE6-DEV	NO	295d1f1f-ea3f-4dab-a8b4-c5071e68ee06	D0914	NYT_ENG_20041007.0255	10	90	reported	report	Radio	radio	Israel Radio	SUBJECT	14	NO	NO
RTE6-DEV	NO	bf43573b-cf8f-475c-8dd7-d57daa568db2	D0914	NYT_ENG_20041007.0255	11	90	reported	report	Radio	radio	Israel Radio	SUBJECT	14	NO	NO
RTE6-DEV	NO	68b437c0-9fa6-43d4-8210-8b911a5583bd	D0914	XIN_ENG_20041007.0328	1	90	killed	kill	blasts	blast	the blasts	OBJECT	2	YES	NO
RTE6-DEV	NO	b3e1d0ee-84bd-4f5c-8c7d-5fa7ac760fba	D0914	AFP_ENG_20041007.0803	12	91	blamed	blame	attacks	attack	the attacks	OBJECT	11	NO	NO
RTE6-DEV	NO	5e962d83-9437-4145-87be-920c5a21273e	D0914	AFP_ENG_20041007.0837	20	91	blamed	blame	attacks	attack	the attacks	OBJECT	4	NO	NO
RTE6-DEV	NO	b8b467bd-c5c9-4c37-8d1f-449625b41a01	D0914	AFP_ENG_20041007.0861	19	91	blamed	blame	attacks	attack	the attacks	OBJECT	4	NO	NO
RTE6-DEV	NO	883c15a5-cd5a-460e-a246-b83952015936	D0916	AFP_ENG_20060110.0024	11	121	captors	captor	Carroll	carroll	Jill Carroll 's	OBJECT	8	NO	NO
RTE6-DEV	NO	541c0b60-c3fd-46a2-9473-bd386f558f3d	D0916	AFP_ENG_20060110.0024	6	121	captors	captor	Carroll	carroll	Jill Carroll 's	OBJECT	6	NO	NO
RTE6-DEV	NO	429d6aa6-62e4-4e77-9ea6-d098adee81c9	D0916	AFP_ENG_20060110.0078	16	121	captors	captor	Carroll	carroll	Jill Carroll 's	OBJECT	16	NO	NO
RTE6-DEV	NO	a032eb9f-3512-4819-ad79-9ab029e9adef	D0916	AFP_ENG_20060110.0430	24	121	captors	captor	Carroll	carroll	Jill Carroll 's	OBJECT	21	NO	NO
RTE6-DEV	NO	ba091ee9-1f47-449d-9d4a-54bdf1a2426f	D0916	AFP_ENG_20060110.0430	19	121	captors	captor	Carroll	carroll	Jill Carroll 's	OBJECT	19	NO	NO
RTE6-DEV	NO	1fff6edd-3051-487c-be28-700fa0bc60e2	D0916	AFP_ENG_20060117.0612	15	121	captors	captor	Carroll	carroll	Jill Carroll 's	OBJECT	15	NO	NO
RTE6-DEV	NO	6c720898-d769-4821-80ca-6c258392305b	D0916	LTW_ENG_20060117.0137	4	121	captors	captor	Carroll	carroll	Jill Carroll 's	OBJECT	4	YES	YES
RTE6-DEV	NO	8f921b3d-e077-473e-bf00-f23b8eead320	D0916	AFP_ENG_20060110.0024	6	122	captors	captor	Carroll	carroll	Jill Carroll	OBJECT	6	NO	NO
RTE6-DEV	NO	e6e13309-386c-4609-9679-870e27ca33cf	D0916	AFP_ENG_20060110.0024	11	122	captors	captor	Carroll	carroll	Jill Carroll	OBJECT	8	NO	NO
RTE6-DEV	NO	2a512935-d1fe-428a-bac8-b8ce55c45a0c	D0916	AFP_ENG_20060110.0078	16	122	captors	captor	Carroll	carroll	Jill Carroll	OBJECT	16	NO	NO
RTE6-DEV	NO	a3a52317-9210-497f-bc1b-a38f27973ead	D0916	AFP_ENG_20060110.0430	19	122	captors	captor	Carroll	carroll	Jill Carroll	OBJECT	19	NO	NO
RTE6-DEV	NO	73046777-c59f-4d7b-823d-bbe87ed29a86	D0916	AFP_ENG_20060110.0430	24	122	captors	captor	Carroll	carroll	Jill Carroll	OBJECT	21	NO	NO
RTE6-DEV	NO	3dc79607-0bf4-4e8c-9f47-3591d1a3ca9d	D0916	AFP_ENG_20060117.0612	6	122	demanded	demand	captors	captor	The captors of Jill Carroll	SUBJECT	15	NO	NO
RTE6-DEV	NO	2cd90a89-4ba3-43ee-8a04-b48626d6d038	D0916	AFP_ENG_20060117.0612	15	122	captors	captor	Carroll	carroll	Jill Carroll	OBJECT	15	NO	NO
RTE6-DEV	NO	8e8a9509-abe0-44da-afc2-1ba2cc37ffa5	D0916	AFP_ENG_20060117.0612	10	122	captors	captor	Carroll	carroll	Jill Carroll	OBJECT	10	NO	NO
RTE6-DEV	NO	a0afb790-0807-4f1b-af3c-d3473eaedd24	D0916	AFP_ENG_20060117.0629	1	122	captors	captor	Carroll	carroll	Jill Carroll	OBJECT	1	YES	YES
RTE6-DEV	NO	76e03750-0e53-486f-bf9a-49a0ef3f11ec	D0916	LTW_ENG_20060117.0137	4	122	demanded	demand	captors	captor	The captors of Jill Carroll	SUBJECT	4	YES	YES
RTE6-DEV	NO	f8231d5c-96a1-4f41-9fcc-8b278e26c5a8	D0916	LTW_ENG_20060117.0137	4	122	captors	captor	Carroll	carroll	Jill Carroll	OBJECT	4	YES	YES
RTE6-DEV	NO	cb056dbe-71c8-4088-a1e7-f55fb30508a4	D0916	AFP_ENG_20060109.0574	4	123	said	say	officials	official	Iraqi officials	SUBJECT	16	NO	NO
RTE6-DEV	NO	f8aced76-f403-43c3-91d8-f5de9d06106a	D0916	AFP_ENG_20060109.0574	7	123	said	say	officials	official	Iraqi officials	SUBJECT	16	NO	NO
RTE6-DEV	NO	87a097fa-5fe0-45bc-94bf-841b172a5560	D0916	AFP_ENG_20060109.0574	14	123	said	say	officials	official	Iraqi officials	SUBJECT	16	NO	NO
RTE6-DEV	NO	a82e806a-edd5-4240-aa95-c4f06a296314	D0916	AFP_ENG_20060109.0574	3	123	said	say	officials	official	Iraqi officials	SUBJECT	16	NO	NO
RTE6-DEV	NO	bc9e67fa-bb69-4e4b-897d-adcd07b90294	D0916	AFP_ENG_20060109.0574	6	123	said	say	officials	official	Iraqi officials	SUBJECT	16	NO	NO
RTE6-DEV	NO	5b22bea5-330d-463f-a1b9-345af62c0764	D0916	AFP_ENG_20060109.0574	18	123	said	say	officials	official	Iraqi officials	SUBJECT	16	NO	NO
RTE6-DEV	NO	750888f0-e82f-4c4b-bd9d-3da4149cbc17	D0916	AFP_ENG_20060109.0574	30	123	said	say	officials	official	Iraqi officials	SUBJECT	16	NO	NO
RTE6-DEV	NO	cbfa7643-cde4-489b-b9d4-ece2deeb8b8c	D0916	AFP_ENG_20060109.0574	17	123	said	say	officials	official	Iraqi officials	SUBJECT	16	NO	NO
RTE6-DEV	NO	899bfb3d-ea31-4398-a0ee-7861ebc16464	D0916	AFP_ENG_20060110.0024	21	123	said	say	officials	official	Iraqi officials	SUBJECT	24	NO	NO
RTE6-DEV	NO	a9ede52a-a09e-46cc-a165-2806a8f22dd9	D0916	AFP_ENG_20060110.0024	15	123	said	say	officials	official	Iraqi officials	SUBJECT	24	NO	NO
RTE6-DEV	NO	eab0406d-a073-4174-b99a-8bd4c19b3578	D0916	AFP_ENG_20060110.0024	5	123	said	say	officials	official	Iraqi officials	SUBJECT	24	NO	NO
RTE6-DEV	NO	2ceae73b-a8d8-4f7e-8ba7-c50d81fa4401	D0916	AFP_ENG_20060110.0024	5	123	release	release	military	military	the U.S. military	SUBJECT	12	NO	NO
RTE6-DEV	NO	65e06882-d594-4ef0-af36-670369da12ae	D0916	AFP_ENG_20060110.0024	10	123	release	release	military	military	the U.S. military	SUBJECT	12	NO	NO
RTE6-DEV	NO	b32f1de3-aa5d-40c3-81da-2a8be9d96f36	D0916	AFP_ENG_20060110.0024	13	123	said	say	officials	official	Iraqi officials	SUBJECT	24	NO	NO
RTE6-DEV	NO	d0ae83ac-b983-482a-b1e5-5af0dca69233	D0916	AFP_ENG_20060110.0024	6	123	said	say	officials	official	Iraqi officials	SUBJECT	24	NO	NO
RTE6-DEV	NO	55ba2d69-4de9-4b27-b5b9-ed5fcc21529c	D0916	AFP_ENG_20060110.0078	15	123	release	release	military	military	the U.S. military	SUBJECT	5	NO	NO
RTE6-DEV	NO	cac4ebaa-28fe-4a63-9ef9-c4589db2e112	D0916	AFP_ENG_20060110.0430	6	123	said	say	officials	official	Iraqi officials	SUBJECT	27	NO	NO
RTE6-DEV	NO	f46d38ab-2b34-42f2-8e1c-b4b9e479f548	D0916	AFP_ENG_20060110.0430	16	123	said	say	officials	official	Iraqi officials	SUBJECT	27	NO	NO
RTE6-DEV	NO	9ede6e00-aeb1-495d-a9e0-8037765d96a0	D0916	AFP_ENG_20060110.0430	9	123	said	say	officials	official	Iraqi officials	SUBJECT	27	NO	NO
RTE6-DEV	NO	cb0d0273-3a10-433b-bbe1-05c902733c2d	D0916	AFP_ENG_20060110.0430	5	123	said	say	officials	official	Iraqi officials	SUBJECT	27	NO	NO
RTE6-DEV	NO	828a95f1-c236-494d-af5c-8478adc770a2	D0916	AFP_ENG_20060110.0430	23	123	release	release	military	military	the U.S. military	SUBJECT	6	NO	NO
RTE6-DEV	NO	b4244816-ce2c-425a-92e1-c9e88d9f3068	D0916	AFP_ENG_20060110.0430	17	123	said	say	officials	official	Iraqi officials	SUBJECT	27	NO	NO
RTE6-DEV	NO	6fd6e697-0c18-469a-adb0-ea8f0fbdb004	D0916	AFP_ENG_20060110.0430	15	123	said	say	officials	official	Iraqi officials	SUBJECT	27	NO	NO
RTE6-DEV	NO	3230c775-37c3-4045-8a28-d667f1a4706d	D0916	AFP_ENG_20060110.0430	18	123	said	say	officials	official	Iraqi officials	SUBJECT	27	NO	NO
RTE6-DEV	NO	3da79ebb-9ff9-461c-b3ae-92cfc3d3b0f1	D0916	AFP_ENG_20060110.0430	28	123	said	say	officials	official	Iraqi officials	SUBJECT	27	NO	NO
RTE6-DEV	NO	ed9d20d8-da0b-48e6-9274-b82e9ca68aa5	D0916	AFP_ENG_20060110.0430	13	123	said	say	officials	official	Iraqi officials	SUBJECT	27	NO	NO
RTE6-DEV	NO	40ba8e16-bb42-43b9-8843-09a396f372a9	D0916	AFP_ENG_20060110.0430	19	123	said	say	officials	official	Iraqi officials	SUBJECT	27	NO	NO
RTE6-DEV	NO	ed88d246-086b-41b1-bba3-d66bdd825e9e	D0916	APW_ENG_20060111.0159	5	123	said	say	officials	official	Iraqi officials	SUBJECT	5	NO	NO
RTE6-DEV	NO	c1254f3b-ccfb-4a55-8f1d-acc7e72bde79	D0916	APW_ENG_20060111.0159	6	123	said	say	officials	official	Iraqi officials	SUBJECT	5	NO	NO
RTE6-DEV	NO	08ff07ee-788c-41b8-808d-2029d43ef216	D0916	AFP_ENG_20060109.0517	2	125	release	release	Iraq	iraq	Iraq	UNKNOWN	1	YES	NO
RTE6-DEV	NO	a456622d-4b34-4453-9245-a0ae4158c3e1	D0916	AFP_ENG_20060109.0574	3	125	release	release	Iraq	iraq	Iraq	UNKNOWN	0	YES	NO
RTE6-DEV	NO	1672d40e-88d7-470a-9fec-e8a54d36945a	D0916	AFP_ENG_20060109.0574	4	125	release	release	Iraq	iraq	Iraq	UNKNOWN	0	NO	NO
RTE6-DEV	NO	9865f860-5910-4148-ae21-5220b525481c	D0916	AFP_ENG_20060109.0574	29	125	release	release	Iraq	iraq	Iraq	UNKNOWN	30	YES	NO
RTE6-DEV	NO	b14db5bd-6d72-4b46-84d9-eb54893fc690	D0916	AFP_ENG_20060109.0574	1	125	release	release	Iraq	iraq	Iraq	UNKNOWN	0	YES	NO
RTE6-DEV	NO	11da40fc-7c3a-4b1a-a737-fe6c74c24e73	D0916	AFP_ENG_20060110.0001	9	125	release	release	Iraq	iraq	Iraq	UNKNOWN	8	NO	NO
RTE6-DEV	NO	98a727d0-14e5-459f-b09d-d6aa17dcce2e	D0916	AFP_ENG_20060110.0024	5	125	release	release	Iraq	iraq	Iraq	UNKNOWN	7	YES	NO
RTE6-DEV	NO	3cebac75-93c6-41a1-84b8-7bf3bd176271	D0916	AFP_ENG_20060110.0078	15	125	release	release	Iraq	iraq	Iraq	UNKNOWN	17	YES	NO
RTE6-DEV	NO	9619aee6-595f-48f4-b02f-26e4e86b4957	D0916	AFP_ENG_20060117.0612	6	125	release	release	Iraq	iraq	Iraq	UNKNOWN	1	NO	NO
RTE6-DEV	NO	48cf59b2-f111-44e2-96a9-52ffb6ee407e	D0916	AFP_ENG_20060117.0612	9	125	release	release	Iraq	iraq	Iraq	UNKNOWN	11	YES	NO
RTE6-DEV	NO	b4d77a57-6f71-45e5-b404-826d5d387a57	D0916	AFP_ENG_20060117.0629	1	125	release	release	Iraq	iraq	Iraq	UNKNOWN	1	YES	NO
RTE6-DEV	NO	101540cd-cc44-4bc6-9e95-ba3e90b2deb9	D0916	AFP_ENG_20060117.0629	0	125	release	release	Iraq	iraq	Iraq	UNKNOWN	1	YES	NO
RTE6-DEV	NO	8fad9bbb-7d98-4127-8cf0-c491ca4143c7	D0916	LTW_ENG_20060117.0137	12	125	release	release	Iraq	iraq	Iraq	UNKNOWN	8	NO	NO
RTE6-DEV	NO	97b8e52f-4f87-494d-b54b-f8a1e948075b	D0916	LTW_ENG_20060117.0137	9	125	release	release	Iraq	iraq	Iraq	UNKNOWN	8	NO	NO
RTE6-DEV	NO	3314eb2e-4d9e-4297-9797-610b7352d171	D0916	AFP_ENG_20060109.0517	2	126	release	release	Carroll	carroll	Jill Carroll	OBJECT	2	YES	YES
RTE6-DEV	NO	a7bf0e45-21ed-4ef7-999d-d1b9bffd7116	D0916	AFP_ENG_20060109.0574	4	126	release	release	Carroll	carroll	Jill Carroll	OBJECT	4	YES	YES
RTE6-DEV	NO	bc34263b-f86d-4d66-bc5b-c7e20baf8f8e	D0916	AFP_ENG_20060109.0574	3	126	release	release	Carroll	carroll	Jill Carroll	OBJECT	3	YES	YES
RTE6-DEV	NO	d6d65f6c-0d65-47d4-a317-fc436b006b5c	D0916	AFP_ENG_20060109.0574	0	126	release	release	Carroll	carroll	Jill Carroll	OBJECT	1	YES	YES
RTE6-DEV	NO	eb8c0926-f60e-4863-ba14-c3b3b06b7437	D0916	AFP_ENG_20060110.0024	5	126	release	release	Carroll	carroll	Jill Carroll	OBJECT	5	YES	YES
RTE6-DEV	NO	260235ac-879f-43e7-ad2c-03b4fed50c37	D0916	AFP_ENG_20060110.0078	15	126	release	release	Carroll	carroll	Jill Carroll	OBJECT	15	YES	YES
RTE6-DEV	NO	b3aea25c-70b5-477a-a080-8596c466a820	D0916	AFP_ENG_20060117.0612	9	126	release	release	Carroll	carroll	Jill Carroll	OBJECT	9	YES	YES
RTE6-DEV	NO	8d0f09dd-420c-4a2d-bd56-b3ed52fd4488	D0916	AFP_ENG_20060117.0629	1	126	appealed	appeal	mother	mother	Jill Carrol 's mother	SUBJECT	2	YES	NO
RTE6-DEV	NO	098f8838-116a-436d-8b62-a69b871a2c21	D0916	AFP_ENG_20060117.0629	1	126	appealed	appeal	release	release	the release of Jill Carroll	OBJECT	1	YES	NO
RTE6-DEV	NO	9dd99628-8d04-46cc-ac92-606d6af9e56d	D0916	AFP_ENG_20060117.0629	1	126	release	release	Carroll	carroll	Jill Carroll	OBJECT	1	YES	YES
RTE6-DEV	NO	0730a899-66e6-43a5-8ff8-d891041712f0	D0916	AFP_ENG_20060117.0629	0	126	release	release	Carroll	carroll	Jill Carroll	OBJECT	1	YES	YES
RTE6-DEV	NO	4b3649d9-2b9d-4874-8400-a5c91dfe7b5d	D0916	LTW_ENG_20060117.0137	12	126	appealed	appeal	mother	mother	Jill Carrol 's mother	SUBJECT	7	NO	NO
RTE6-DEV	NO	40a88a94-91d6-490d-af36-97f5939d960d	D0916	LTW_ENG_20060117.0137	9	126	release	release	Carroll	carroll	Jill Carroll	OBJECT	7	YES	YES
RTE6-DEV	NO	cef7a42f-5a20-46e4-a73e-6b2d14ae7439	D0916	AFP_ENG_20060109.0517	2	127	release	release	Carroll	carroll	Jill Carroll	OBJECT	2	YES	YES
RTE6-DEV	NO	561869a2-ffa0-42bc-9c7b-bbd6842108a1	D0916	AFP_ENG_20060109.0574	4	127	release	release	Carroll	carroll	Jill Carroll	OBJECT	4	YES	YES
RTE6-DEV	NO	557c1019-a15e-4e31-badb-24d151541c49	D0916	AFP_ENG_20060109.0574	3	127	release	release	Carroll	carroll	Jill Carroll	OBJECT	3	YES	YES
RTE6-DEV	NO	fc136a74-2fee-4405-bfd1-7b8cbda3ad8f	D0916	AFP_ENG_20060109.0574	0	127	release	release	Carroll	carroll	Jill Carroll	OBJECT	1	YES	YES
RTE6-DEV	NO	1b4a3840-a8f9-44b3-936e-6e5afb44697c	D0916	AFP_ENG_20060110.0024	5	127	release	release	Carroll	carroll	Jill Carroll	OBJECT	5	YES	YES
RTE6-DEV	NO	e13b2cf8-6705-454d-b2cc-aa10c5f4876c	D0916	AFP_ENG_20060110.0078	15	127	release	release	Carroll	carroll	Jill Carroll	OBJECT	15	YES	YES
RTE6-DEV	NO	db614ec4-8d31-4dbf-bb7f-e8e5df16932d	D0916	AFP_ENG_20060117.0612	9	127	release	release	Carroll	carroll	Jill Carroll	OBJECT	9	YES	YES
RTE6-DEV	NO	d08cb84e-02fd-4f79-bccb-61431399dc3d	D0916	AFP_ENG_20060117.0629	1	127	appealed	appeal	release	release	the release of Jill Carroll	OBJECT	1	YES	NO
RTE6-DEV	NO	1189a09b-4ef1-44ed-b7d3-9c28c462f036	D0916	AFP_ENG_20060117.0629	1	127	release	release	Carroll	carroll	Jill Carroll	OBJECT	1	YES	YES
RTE6-DEV	NO	77669711-21a3-4273-8e6b-3d0617c3ce7f	D0916	AFP_ENG_20060117.0629	0	127	release	release	Carroll	carroll	Jill Carroll	OBJECT	1	YES	YES
RTE6-DEV	NO	c5ea9b30-d5af-4ee2-9db7-dcccd0fdbe0d	D0916	LTW_ENG_20060117.0137	9	127	release	release	Carroll	carroll	Jill Carroll	OBJECT	7	YES	YES
RTE6-DEV	NO	047e42f8-e3fa-46d1-b085-2852038a78db	D0916	AFP_ENG_20060109.0517	2	128	release	release	Carroll	carroll	Jill Carroll	OBJECT	2	YES	YES
RTE6-DEV	NO	c5756320-cf78-4355-8a2c-45b2bffbaabd	D0916	AFP_ENG_20060109.0574	3	128	seeking	seek	release	release	the release of Jill Carroll	OBJECT	3	NO	NO
RTE6-DEV	NO	2dc82b22-43e7-4f51-a283-81d26d9d260c	D0916	AFP_ENG_20060109.0574	3	128	release	release	Carroll	carroll	Jill Carroll	OBJECT	3	YES	YES
RTE6-DEV	NO	edcf34cc-792d-4503-9923-1fc0c1564e87	D0916	AFP_ENG_20060109.0574	4	128	release	release	Carroll	carroll	Jill Carroll	OBJECT	4	YES	YES
RTE6-DEV	NO	31fd2890-0f0e-4adb-9b71-abac2e392d0f	D0916	AFP_ENG_20060109.0574	0	128	release	release	Carroll	carroll	Jill Carroll	OBJECT	1	YES	YES
RTE6-DEV	NO	7a70b2f1-d1f1-4273-929d-9c1ffd14a79e	D0916	AFP_ENG_20060110.0024	5	128	seeking	seek	release	release	the release of Jill Carroll	OBJECT	5	YES	YES
RTE6-DEV	NO	2728f32d-e285-427c-a66e-1473868f220f	D0916	AFP_ENG_20060110.0024	5	128	release	release	Carroll	carroll	Jill Carroll	OBJECT	5	YES	YES
RTE6-DEV	NO	532d4895-85e7-4981-abd1-81a320fb6551	D0916	AFP_ENG_20060110.0078	15	128	seeking	seek	release	release	the release of Jill Carroll	OBJECT	15	NO	NO
RTE6-DEV	NO	55ea4913-36c5-4a1d-8f27-edf4a9791c86	D0916	AFP_ENG_20060110.0078	15	128	release	release	Carroll	carroll	Jill Carroll	OBJECT	15	YES	YES
RTE6-DEV	NO	1af4dfd9-c769-430a-bf85-4e28499db379	D0916	AFP_ENG_20060110.0430	18	128	seeking	seek	release	release	the release of Jill Carroll	OBJECT	23	NO	NO
RTE6-DEV	NO	57152f2e-f0b5-4ab9-813f-ebd529a6331d	D0916	AFP_ENG_20060117.0612	9	128	seeking	seek	release	release	the release of Jill Carroll	OBJECT	9	NO	NO
RTE6-DEV	NO	a48e9ea7-2290-4dc3-85b2-0ac4677aedc7	D0916	AFP_ENG_20060117.0612	9	128	release	release	Carroll	carroll	Jill Carroll	OBJECT	9	YES	YES
RTE6-DEV	NO	1941f32e-bb5e-41d3-b86d-b8fae25c82f2	D0916	AFP_ENG_20060117.0629	1	128	release	release	Carroll	carroll	Jill Carroll	OBJECT	1	YES	YES
RTE6-DEV	NO	0bf07d48-c0cc-428e-a82f-a0f05ab2cf51	D0916	AFP_ENG_20060117.0629	0	128	release	release	Carroll	carroll	Jill Carroll	OBJECT	1	YES	YES
RTE6-DEV	NO	b8fd4964-5be6-4987-82e6-25962eac848b	D0916	LTW_ENG_20060117.0137	9	128	release	release	Carroll	carroll	Jill Carroll	OBJECT	7	YES	YES
RTE6-DEV	NO	90e101cc-a965-43f6-b525-eb41c7d8cc0d	D0916	AFP_ENG_20060117.0612	3	129	showed	show	videotape	videotape	a videotape of Jill Carroll	OBJECT	2	NO	NO
RTE6-DEV	NO	73edba05-df46-41ac-87cf-d5d7cf86540b	D0916	AFP_ENG_20060117.0629	2	129	showed	show	videotape	videotape	a videotape of Jill Carroll	OBJECT	3	NO	NO
RTE6-DEV	NO	98ccb711-f192-4f79-99c0-a969dc379005	D0916	AFP_ENG_20060109.0574	27	131	killed	kill	translator	translator	Jill Carroll 's translator	OBJECT	1	NO	NO
RTE6-DEV	NO	4bdb33f0-9621-4e6e-9476-29631a792c95	D0916	AFP_ENG_20060110.0001	5	131	killed	kill	translator	translator	Jill Carroll 's translator	OBJECT	9	NO	NO
RTE6-DEV	NO	f48cdaef-4d0d-49b3-91e7-166940e94808	D0916	LTW_ENG_20060117.0137	1	131	killed	kill	translator	translator	Jill Carroll 's translator	OBJECT	5	NO	NO
RTE6-DEV	NO	0ce69cfd-198d-4bcb-af31-d3b09de17533	D0916	AFP_ENG_20060110.0024	13	132	escaped	escape	driver	driver	Jill Carroll 's driver	SUBJECT	6	NO	NO
RTE6-DEV	NO	d8a214ca-a32d-40dc-9ada-7804c1c8ead4	D0916	AFP_ENG_20060110.0024	1	132	escaped	escape	driver	driver	Jill Carroll 's driver	SUBJECT	3	NO	NO
RTE6-DEV	NO	5586780c-484b-4666-bc45-9ebee7d1000a	D0916	AFP_ENG_20060109.0517	2	133	kidnapping	kidnapping	Carroll	carroll	Jill Carroll	OBJECT	2	YES	NO
RTE6-DEV	NO	64304b30-0c3f-406b-829a-b96f12dd5b70	D0916	AFP_ENG_20060109.0574	26	133	kidnapping	kidnapping	Carroll	carroll	Jill Carroll	OBJECT	26	YES	NO
RTE6-DEV	NO	56dae070-18ca-40fb-b4b3-a648373e3497	D0916	AFP_ENG_20060110.0024	1	133	kidnapping	kidnapping	Carroll	carroll	Jill Carroll	OBJECT	2	YES	YES
RTE6-DEV	NO	d2728383-c983-475e-b709-4acb786e7640	D0916	AFP_ENG_20060110.0024	8	133	kidnapping	kidnapping	Carroll	carroll	Jill Carroll	OBJECT	8	YES	NO
RTE6-DEV	NO	9e4f316b-bada-44da-9923-aca8988b274c	D0916	AFP_ENG_20060110.0078	3	133	kidnapping	kidnapping	Carroll	carroll	Jill Carroll	OBJECT	3	YES	NO
RTE6-DEV	NO	c9523df9-9565-4331-a915-3576c4c4480d	D0916	AFP_ENG_20060110.0078	1	133	kidnapping	kidnapping	Carroll	carroll	Jill Carroll	OBJECT	3	YES	YES
RTE6-DEV	NO	212b0810-4948-4776-aea5-8f0c96590777	D0916	AFP_ENG_20060110.0078	18	133	kidnapping	kidnapping	Carroll	carroll	Jill Carroll	OBJECT	18	YES	NO
RTE6-DEV	NO	41b1e94a-02df-4438-a190-60f0401f843d	D0916	AFP_ENG_20060110.0430	5	133	kidnapping	kidnapping	Carroll	carroll	Jill Carroll	OBJECT	5	YES	NO
RTE6-DEV	NO	1eebd43c-7b91-4eb2-a855-a6f49397f045	D0916	AFP_ENG_20060110.0430	6	133	kidnapping	kidnapping	Carroll	carroll	Jill Carroll	OBJECT	5	YES	NO
RTE6-DEV	NO	916a2ad9-a8db-4ebf-ad87-cdd35ea2a3db	D0916	AFP_ENG_20060110.0430	1	133	kidnapping	kidnapping	Carroll	carroll	Jill Carroll	OBJECT	5	YES	YES
RTE6-DEV	NO	49b586fc-0f81-457c-bce2-9a548d300b6a	D0916	AFP_ENG_20060110.0430	21	133	kidnapping	kidnapping	Carroll	carroll	Jill Carroll	OBJECT	21	YES	NO
RTE6-DEV	NO	e17297f8-7b35-45f1-ba6f-2a5c64d6144c	D0916	AFP_ENG_20060117.0612	8	133	kidnapping	kidnapping	Carroll	carroll	Jill Carroll	OBJECT	7	YES	NO
RTE6-DEV	NO	c2c8b06f-1a1f-4268-98f6-236f18aa6d45	D0916	AFP_ENG_20060117.0612	1	133	kidnapping	kidnapping	Carroll	carroll	Jill Carroll	OBJECT	2	YES	YES
RTE6-DEV	NO	b7c0935c-d529-4fdf-9b62-80ac10e8ac1e	D0916	AFP_ENG_20060117.0612	7	133	kidnapping	kidnapping	Carroll	carroll	Jill Carroll	OBJECT	7	YES	NO
RTE6-DEV	NO	8cae5447-e269-41cf-8798-33f72d765c4b	D0916	AFP_ENG_20060117.0612	12	133	kidnapping	kidnapping	Carroll	carroll	Jill Carroll	OBJECT	12	YES	NO
RTE6-DEV	NO	0c660b0e-c062-4329-b6e1-d2372ec9b63c	D0916	AFP_ENG_20060117.0629	8	133	face	face	journalists	journalist	journalists	SUBJECT	2	NO	NO
RTE6-DEV	NO	a044be83-6740-4dd6-a886-0c3be3ea2ec0	D0916	AFP_ENG_20060117.0629	10	133	kidnapping	kidnapping	Carroll	carroll	Jill Carroll	OBJECT	10	YES	NO
RTE6-DEV	NO	4f4fad39-16be-4acd-90bc-196d0c0ede03	D0916	APW_ENG_20060111.0159	11	133	kidnapping	kidnapping	Carroll	carroll	Jill Carroll	OBJECT	12	YES	NO
RTE6-DEV	NO	de7cc562-069f-41b5-9687-06b2baf34c05	D0916	AFP_ENG_20060109.0517	2	134	kidnapping	kidnapping	Carroll	carroll	Jill Carroll	OBJECT	2	YES	NO
RTE6-DEV	NO	bcb7848b-1b6a-42e9-8053-53596744e350	D0916	AFP_ENG_20060109.0574	26	134	kidnapping	kidnapping	Carroll	carroll	Jill Carroll	OBJECT	26	YES	NO
RTE6-DEV	NO	fa4a5881-f5b9-4bb8-91e3-d7ee85e33302	D0916	AFP_ENG_20060110.0024	1	134	kidnapping	kidnapping	Carroll	carroll	Jill Carroll	OBJECT	2	YES	YES
RTE6-DEV	NO	b84a66fb-e70f-4ba7-afd6-833b6ecdd2e9	D0916	AFP_ENG_20060110.0024	8	134	kidnapping	kidnapping	Carroll	carroll	Jill Carroll	OBJECT	8	YES	NO
RTE6-DEV	NO	e94a2da1-cc5e-44e4-af08-7b50104154e1	D0916	AFP_ENG_20060110.0078	3	134	kidnapping	kidnapping	Carroll	carroll	Jill Carroll	OBJECT	3	YES	NO
RTE6-DEV	NO	402a7283-9e5f-4985-b276-be1a7ac46b49	D0916	AFP_ENG_20060110.0078	1	134	kidnapping	kidnapping	Carroll	carroll	Jill Carroll	OBJECT	3	YES	YES
RTE6-DEV	NO	2483b8d1-a471-4078-aa38-63cc3deefe69	D0916	AFP_ENG_20060110.0078	18	134	kidnapping	kidnapping	Carroll	carroll	Jill Carroll	OBJECT	18	YES	NO
RTE6-DEV	NO	d40a990f-25ed-455f-a760-79bf4a7119b5	D0916	AFP_ENG_20060110.0430	5	134	kidnapping	kidnapping	Carroll	carroll	Jill Carroll	OBJECT	5	YES	NO
RTE6-DEV	NO	65c52a9a-911e-45cd-b14b-20727b3d9686	D0916	AFP_ENG_20060110.0430	6	134	kidnapping	kidnapping	Carroll	carroll	Jill Carroll	OBJECT	5	YES	NO
RTE6-DEV	NO	bd201ca2-d815-48a6-bfa7-d58687faeab8	D0916	AFP_ENG_20060110.0430	1	134	kidnapping	kidnapping	Carroll	carroll	Jill Carroll	OBJECT	5	YES	YES
RTE6-DEV	NO	95f68fb9-6c04-4366-a750-8779241b0d1b	D0916	AFP_ENG_20060110.0430	21	134	kidnapping	kidnapping	Carroll	carroll	Jill Carroll	OBJECT	21	YES	NO
RTE6-DEV	NO	617be867-97d8-4c6b-a170-dbf151ce88cc	D0916	AFP_ENG_20060117.0612	8	134	kidnapping	kidnapping	Carroll	carroll	Jill Carroll	OBJECT	7	YES	NO
RTE6-DEV	NO	4cbf9696-fb45-4185-8eeb-eff01edde810	D0916	AFP_ENG_20060117.0612	1	134	kidnapping	kidnapping	Carroll	carroll	Jill Carroll	OBJECT	2	YES	YES
RTE6-DEV	NO	55de20f0-6927-47e3-b207-ea2c239b757f	D0916	AFP_ENG_20060117.0612	7	134	kidnapping	kidnapping	Carroll	carroll	Jill Carroll	OBJECT	7	YES	NO
RTE6-DEV	NO	ebda5a02-eece-424b-aba0-4d307152c327	D0916	AFP_ENG_20060117.0612	12	134	kidnapping	kidnapping	Carroll	carroll	Jill Carroll	OBJECT	12	YES	NO
RTE6-DEV	NO	61e8f715-0598-4897-b93a-353d380a5ddf	D0916	AFP_ENG_20060117.0629	10	134	kidnapping	kidnapping	Carroll	carroll	Jill Carroll	OBJECT	10	YES	NO
RTE6-DEV	NO	600ed100-9ea4-4479-8ee5-bc623565eabc	D0916	APW_ENG_20060111.0159	11	134	kidnapping	kidnapping	Carroll	carroll	Jill Carroll	OBJECT	12	YES	NO
RTE6-DEV	NO	e596e43e-38e5-401b-96d2-d7a56a21aa9a	D0916	AFP_ENG_20060109.0574	9	135	works	work	Monitor	monitor	Christian Science Monitor	OBJECT	7	NO	NO
RTE6-DEV	NO	b9543907-e6de-4132-810a-f9ddfad00052	D0916	AFP_ENG_20060109.0574	26	135	works	work	Carroll	carroll	Jill Carroll	SUBJECT	26	YES	NO
RTE6-DEV	NO	b5fa920c-a1d5-4403-8ee7-d19e547322f3	D0916	AFP_ENG_20060109.0574	26	135	works	work	Monitor	monitor	Christian Science Monitor	OBJECT	17	NO	NO
RTE6-DEV	NO	24cbcf4f-5003-4867-9b86-5c111b53861f	D0916	AFP_ENG_20060110.0024	8	135	works	work	Carroll	carroll	Jill Carroll	SUBJECT	8	YES	NO
RTE6-DEV	NO	55dbc3d7-d1ae-41e9-b2c7-6e7c021a4dc9	D0916	AFP_ENG_20060110.0024	8	135	works	work	Monitor	monitor	Christian Science Monitor	OBJECT	6	NO	NO
RTE6-DEV	NO	b1cb4e6e-0479-463d-94f3-5f859be0fb73	D0916	AFP_ENG_20060110.0078	18	135	works	work	Carroll	carroll	Jill Carroll	SUBJECT	18	YES	NO
RTE6-DEV	NO	38eca7d5-6252-4560-a65b-3157cbba42e8	D0916	AFP_ENG_20060110.0078	18	135	works	work	Monitor	monitor	Christian Science Monitor	OBJECT	16	NO	NO
RTE6-DEV	NO	6f603825-e921-4ce4-bc4a-a454071a735a	D0916	AFP_ENG_20060110.0430	21	135	works	work	Carroll	carroll	Jill Carroll	SUBJECT	21	YES	NO
RTE6-DEV	NO	480f35e0-a945-4a61-b938-d50df3cec60c	D0916	AFP_ENG_20060110.0430	21	135	works	work	Monitor	monitor	Christian Science Monitor	OBJECT	19	NO	NO
RTE6-DEV	NO	334b184e-b33e-48be-8b35-e87a00974b2e	D0916	AFP_ENG_20060117.0612	12	135	works	work	Carroll	carroll	Jill Carroll	SUBJECT	12	YES	NO
RTE6-DEV	NO	6c892567-c4b4-42ff-975b-a30fe34aec6a	D0916	AFP_ENG_20060117.0612	12	135	works	work	Monitor	monitor	Christian Science Monitor	OBJECT	10	NO	NO
RTE6-DEV	NO	28cf1bbf-b42f-4cb9-b95b-dcb26c47f9d0	D0916	AFP_ENG_20060117.0629	10	135	works	work	Carroll	carroll	Jill Carroll	SUBJECT	10	YES	NO
RTE6-DEV	NO	b3c08b4f-123f-433c-94bb-dddb769c7b65	D0916	AFP_ENG_20060117.0629	10	135	works	work	Monitor	monitor	Christian Science Monitor	OBJECT	4	NO	NO
RTE6-DEV	NO	6882adc1-d0a7-4d75-8d15-66a0dffe4d4b	D0916	AFP_ENG_20060109.0517	1	256	seized	seize	Carroll	carroll	Jill Carroll	OBJECT	1	YES	YES
RTE6-DEV	NO	8862fc05-9732-4a99-b7c9-4e679ddf3852	D0916	AFP_ENG_20060109.0574	1	256	seized	seize	Carroll	carroll	Jill Carroll	OBJECT	1	YES	NO
RTE6-DEV	NO	b3f709ea-c0aa-4c2f-bd4a-d457d96eb30b	D0916	AFP_ENG_20060110.0001	9	256	seized	seize	Carroll	carroll	Jill Carroll	OBJECT	9	YES	NO
RTE6-DEV	NO	24e55c7b-e729-474f-ba16-cf580898e7bd	D0916	AFP_ENG_20060109.0517	1	257	seized	seize	Carroll	carroll	Jill Carroll	OBJECT	1	YES	YES
RTE6-DEV	NO	c23e1e47-8af2-4523-ab88-c3d034bca4e0	D0916	AFP_ENG_20060109.0574	14	257	seized	seize	gunmen	gunman	gunmen	SUBJECT	17	YES	NO
RTE6-DEV	NO	2f596e49-8c31-4d6e-bd6e-6b9ac17aced8	D0922	APW_ENG_20050323.0358	14	174	let	let	provisions	provisions	The Patriot Act provisions	SUBJECT	8	YES	YES
RTE6-DEV	NO	c685027f-5440-4940-8dae-d448d0fcb6c4	D0922	NYT_ENG_20050322.0262	10	174	let	let	provisions	provisions	The Patriot Act provisions	SUBJECT	9	YES	NO
RTE6-DEV	NO	b2cd1482-d937-4f38-b2a6-aa95513f1714	D0922	APW_ENG_20050323.0358	7	175	expiring	expire	provisions	provisions	provisions of the Patriot Act	OBJECT	8	YES	NO
RTE6-DEV	NO	c09e5406-663d-42ba-842e-6f6f3ea5204e	D0922	LTW_ENG_20050322.0139	7	175	expiring	expire	provisions	provisions	provisions of the Patriot Act	OBJECT	7	YES	NO
RTE6-DEV	NO	d66c39bc-e305-4d16-9d02-fe0d0f852c4d	D0922	NYT_ENG_20050214.0176	7	175	expiring	expire	provisions	provisions	provisions of the Patriot Act	OBJECT	3	YES	YES
RTE6-DEV	NO	9b622c6f-cc1e-4b07-b5bc-641460d08b16	D0922	NYT_ENG_20041026.0202	2	178	passed	pass	Congress	congress	Congress	SUBJECT	2	YES	NO
RTE6-DEV	NO	5eaf5343-5381-4ab4-b90b-8f4dd7fdca66	D0922	NYT_ENG_20050322.0262	4	178	passed	pass	Congress	congress	Congress	SUBJECT	1	YES	YES
RTE6-DEV	NO	383598f0-f562-4f92-8040-01646a037146	D0922	NYT_ENG_20050322.0262	4	178	passed	pass	2001	2001	11 9 2001	OBJECT	1	YES	NO
RTE6-DEV	NO	e6895367-96e5-48b1-b3b6-ae87d0134270	D0922	NYT_ENG_20050322.0262	19	178	passed	pass	Congress	congress	Congress	SUBJECT	7	NO	NO
RTE6-DEV	NO	c39fe93f-99c6-4709-99d3-85a70e6c2fd5	D0922	NYT_ENG_20050322.0262	19	178	passed	pass	Act	act	the Patriot Act	OBJECT	19	NO	NO
RTE6-DEV	NO	7d6d741d-b0bc-431a-b3aa-40dcbcae354d	D0922	NYT_ENG_20050322.0262	19	178	passed	pass	2001	2001	11 9 2001	OBJECT	1	NO	NO
RTE6-DEV	NO	89015a61-ad0b-4550-a56d-63c4717c9b19	D0922	APW_ENG_20050214.0666	4	180	pass	pass	Congress	congress	Congress	SUBJECT	1	YES	NO
RTE6-DEV	NO	85fced87-14c9-49f7-a56a-d674e25c572c	D0922	NYT_ENG_20041004.0143	1	180	pass	pass	Act	act	SAFE Act	OBJECT	2	NO	NO
RTE6-DEV	NO	923936af-dc50-4b52-956d-9350b47ffb22	D0922	NYT_ENG_20041026.0202	2	180	pass	pass	Congress	congress	Congress	SUBJECT	2	YES	NO
RTE6-DEV	NO	aad2e0ba-e19c-45a2-b0ac-5cf54b07d40b	D0922	NYT_ENG_20050322.0262	4	180	pass	pass	Congress	congress	Congress	SUBJECT	1	YES	NO
RTE6-DEV	NO	6c5c92fe-2bf4-4dec-8ba5-dd98136fac7a	D0922	NYT_ENG_20050322.0262	19	180	pass	pass	Congress	congress	Congress	SUBJECT	7	NO	NO
RTE6-DEV	NO	ba57fee5-3d2f-403d-a219-6cc48c9046f2	D0922	NYT_ENG_20050322.0262	19	180	pass	pass	Act	act	SAFE Act	OBJECT	19	NO	NO
RTE6-DEV	NO	f395bd2b-a108-40a7-9ac3-55428e95158e	D0922	NYT_ENG_20041026.0202	6	182	comes	come	2005	2005	2005	OBJECT	3	NO	NO
RTE6-DEV	NO	2cb9f923-42bb-4933-a46c-295a9516e936	D0922	NYT_ENG_20041026.0202	11	182	comes	come	Act	act	The Patriot Act	SUBJECT	11	NO	NO
RTE6-DEV	NO	90eb1a50-dc3c-4555-83c5-ff6b5eb590d0	D0922	NYT_ENG_20041026.0202	11	182	comes	come	2005	2005	2005	OBJECT	3	NO	NO
RTE6-DEV	NO	44443ca0-6422-432e-b55e-bdefc197ecfb	D0922	APW_ENG_20050323.0358	7	183	expire	expire	sections	section	Many sections of the Patriot Act	SUBJECT	15	YES	NO
RTE6-DEV	NO	01ef69d8-817e-433e-a2b5-a575b66c2843	D0922	APW_ENG_20050323.0358	12	183	expire	expire	sections	section	Many sections of the Patriot Act	SUBJECT	15	NO	NO
RTE6-DEV	NO	15525d1e-feec-48b0-a121-97373e7dab94	D0922	LTW_ENG_20050322.0139	5	183	expire	expire	sections	section	Many sections of the Patriot Act	SUBJECT	5	YES	NO
RTE6-DEV	NO	eda989ee-d0f3-4ff1-a08e-7e351d97f0db	D0922	LTW_ENG_20050322.0139	7	183	expire	expire	sections	section	Many sections of the Patriot Act	SUBJECT	8	YES	NO
RTE6-DEV	NO	2976834b-8bfd-402b-9f10-aad3e7d2b877	D0922	APW_ENG_20041025.0389	11	184	renewal	renewal	Act	act	the Patriot Act	OBJECT	10	YES	YES
RTE6-DEV	NO	762d7d94-50cb-478c-90cc-cfdbaa71bfb9	D0922	APW_ENG_20050214.0666	7	184	renewal	renewal	Act	act	the Patriot Act	OBJECT	7	NO	NO
RTE6-DEV	NO	ab4a0f87-3640-4418-86e3-e57957e5829a	D0922	LTW_ENG_20050322.0139	9	184	defends	defend	Gonzales	gonzales	Alberto Gonzales	SUBJECT	9	NO	NO
RTE6-DEV	NO	c82321eb-9d97-4615-8bc0-85cd1c22584d	D0922	LTW_ENG_20050322.0139	9	184	defends	defend	renewal	renewal	renewal of the Patriot Act	OBJECT	5	NO	NO
RTE6-DEV	NO	40684ca8-061d-43ea-9884-5d1d960bdeae	D0922	LTW_ENG_20050322.0139	9	184	defends	defend	to	to	to Congress	MODIFIER	9	NO	NO
RTE6-DEV	NO	0bf97b0b-5f3d-41ba-ac96-0121dbc91857	D0922	NYT_ENG_20041026.0202	3	184	renewal	renewal	Act	act	the Patriot Act	OBJECT	3	YES	YES
RTE6-DEV	NO	93d03f28-278d-4e8e-83dc-7214785c0069	D0922	NYT_ENG_20041026.0202	1	184	defends	defend	to	to	to Congress	MODIFIER	2	NO	NO
RTE6-DEV	NO	b7c74596-692f-4d7a-affb-3ea5c1eab806	D0922	NYT_ENG_20041026.0202	9	184	defends	defend	to	to	to Congress	MODIFIER	10	NO	NO
RTE6-DEV	NO	d2736a16-e276-4d32-ae06-75d22b5e41f3	D0922	NYT_ENG_20041026.0202	4	184	renewal	renewal	Act	act	the Patriot Act	OBJECT	3	YES	NO
RTE6-DEV	NO	dee33633-9789-4ea9-b8bd-5a56dc87074d	D0922	NYT_ENG_20050214.0176	0	184	renewal	renewal	Act	act	the Patriot Act	OBJECT	0	NO	NO
RTE6-DEV	NO	c32aa437-0a79-4529-835f-864e96921348	D0922	NYT_ENG_20050214.0176	5	184	defends	defend	Gonzales	gonzales	Alberto Gonzales	SUBJECT	5	NO	NO
RTE6-DEV	NO	82ec284d-2b0d-46f5-8644-dde89556fdda	D0922	NYT_ENG_20050214.0176	5	184	defends	defend	to	to	to Congress	MODIFIER	5	NO	NO
RTE6-DEV	NO	1aa1186d-9cba-49a0-a41b-5da8de0d843d	D0922	NYT_ENG_20050214.0176	9	184	renewal	renewal	Act	act	the Patriot Act	OBJECT	8	NO	NO
RTE6-DEV	NO	7b9fe4f3-6df8-4abb-8a5a-17cd5fc487cc	D0922	NYT_ENG_20050322.0262	1	184	renewal	renewal	Act	act	the Patriot Act	OBJECT	1	YES	YES
RTE6-DEV	NO	1af85a4d-9262-4206-9d49-fab44fb7337c	D0922	APW_ENG_20050214.0666	4	186	used	use	warrants	warrant	the Patriot Act search warrants	OBJECT	4	YES	NO
RTE6-DEV	NO	becac951-fd8c-416f-8e94-82df80f7e5b1	D0922	APW_ENG_20050214.0666	4	186	warrants	warrant	Act	act	Patriot Act	UNKNOWN	4	NO	NO
RTE6-DEV	NO	91e65419-69e2-494c-8278-b143f3978925	D0922	APW_ENG_20050317.0771	12	186	warrants	warrant	Act	act	Patriot Act	UNKNOWN	11	YES	NO
RTE6-DEV	NO	f4c9958d-fe77-47d7-9718-b2f9d56bd01f	D0922	APW_ENG_20050317.0771	17	186	used	use	agents	agent	FBI agents	SUBJECT	12	YES	NO
RTE6-DEV	NO	f42c5ccd-97d9-410b-afd6-c9d02c56408d	D0922	APW_ENG_20050317.0771	17	186	used	use	warrants	warrant	the Patriot Act search warrants	OBJECT	16	YES	NO
RTE6-DEV	NO	64c17fbe-7ec1-441e-a278-55a4aa76de77	D0922	APW_ENG_20050317.0771	16	186	warrants	warrant	Act	act	Patriot Act	UNKNOWN	16	YES	NO
RTE6-DEV	NO	56446505-6c7f-434d-8a1b-858c9195af3e	D0922	APW_ENG_20050317.0771	16	186	warrants	warrant	search	search	search	UNKNOWN	12	YES	NO
RTE6-DEV	NO	23929228-cdea-4484-8476-4368b432e1b8	D0922	APW_ENG_20050323.0358	7	186	warrants	warrant	Act	act	Patriot Act	UNKNOWN	7	YES	NO
RTE6-DEV	NO	e5f5d928-7a5c-4049-aaa2-8be889d58b47	D0922	APW_ENG_20050323.0358	7	186	warrants	warrant	search	search	search	UNKNOWN	7	YES	NO
RTE6-DEV	NO	2c9e3b43-c83e-4c81-9df5-a671f9bdd2e7	D0922	NYT_ENG_20041026.0202	12	186	warrants	warrant	Act	act	Patriot Act	UNKNOWN	11	YES	NO
RTE6-DEV	NO	1340918b-7b3f-4f1a-815c-60a51f12815f	D0922	NYT_ENG_20041026.0202	12	186	warrants	warrant	search	search	search	UNKNOWN	11	YES	NO
RTE6-DEV	NO	d99d189b-00d1-4c3f-b8fc-95611bbdb8c8	D0922	NYT_ENG_20050214.0176	8	186	used	use	agents	agent	FBI agents	SUBJECT	8	YES	NO
RTE6-DEV	NO	210bfa30-86a0-45e4-9acd-c6e96a5e1002	D0922	NYT_ENG_20050322.0262	3	186	used	use	agents	agent	FBI agents	SUBJECT	3	NO	NO
RTE6-DEV	NO	959deab6-9da7-415f-ae7d-42a4a013363b	D0922	NYT_ENG_20050322.0262	3	186	used	use	warrants	warrant	the Patriot Act search warrants	OBJECT	11	NO	NO
RTE6-DEV	NO	35eff635-3758-4b3a-b6c6-483f5e87128b	D0922	NYT_ENG_20050322.0262	11	186	warrants	warrant	Act	act	Patriot Act	UNKNOWN	8	YES	NO
RTE6-DEV	NO	14fda554-b3ab-414b-ac06-1afa34e4b4b9	D0922	NYT_ENG_20050322.0262	11	186	warrants	warrant	search	search	search	UNKNOWN	12	YES	NO
RTE6-DEV	NO	51492a36-fa28-4146-b703-f946de585216	D0922	APW_ENG_20041025.0389	6	187	investigators	investigator	Department	department	Justice Department	OBJECT	1	NO	NO
RTE6-DEV	NO	3ebbe1a1-ba19-420b-9fb4-a2434dc4f74c	D0922	APW_ENG_20050214.0666	4	187	allowed	allow	Act	act	the Patriot Act	OBJECT	4	YES	NO
RTE6-DEV	NO	ad6272b4-3153-493b-9fe4-7001573cccb9	D0922	APW_ENG_20050214.0666	4	187	allowed	allow	powers	power	powers	OBJECT	4	NO	NO
RTE6-DEV	NO	f93362da-1fba-4b02-bff1-458c6ac05ff6	D0922	APW_ENG_20050214.0666	4	187	used	use	powers	power	powers	OBJECT	4	NO	NO
RTE6-DEV	NO	8fdc4080-6583-4067-8694-90180e04f65d	D0922	APW_ENG_20050214.0666	2	187	allowed	allow	Act	act	the Patriot Act	OBJECT	1	NO	NO
RTE6-DEV	NO	ff40c0c3-31ff-499c-b457-e8b959baa07f	D0922	APW_ENG_20050214.0666	2	187	allowed	allow	powers	power	powers	OBJECT	4	NO	NO
RTE6-DEV	NO	5955b382-c0b3-4db5-9574-fbd9e2313a0c	D0922	APW_ENG_20050317.0771	17	187	used	use	powers	power	powers	OBJECT	12	YES	YES
RTE6-DEV	NO	7c4399c1-40ac-4e35-b0b2-a2ce387d2988	D0922	APW_ENG_20050323.0358	7	187	allowed	allow	Act	act	the Patriot Act	OBJECT	7	YES	YES
RTE6-DEV	NO	5ae7bacb-f64f-4878-bda7-3b50d9a88e8d	D0922	APW_ENG_20050323.0358	7	187	allowed	allow	powers	power	powers	OBJECT	4	NO	NO
RTE6-DEV	NO	5e71dd68-005e-41c6-a7f9-a428cf835c24	D0922	NYT_ENG_20041026.0202	11	187	allowed	allow	Act	act	the Patriot Act	OBJECT	11	YES	YES
RTE6-DEV	NO	025a67fd-19db-4c95-9195-45b09e83f0ee	D0922	NYT_ENG_20041026.0202	11	187	allowed	allow	powers	power	powers	OBJECT	4	NO	NO
RTE6-DEV	NO	eb3da9dd-4de3-4608-acad-6ea411ed4461	D0922	NYT_ENG_20041026.0202	12	187	used	use	powers	power	powers	OBJECT	4	NO	NO
RTE6-DEV	NO	e8d999b6-954a-4cbe-899d-545f69d9bc31	D0922	NYT_ENG_20050214.0176	2	187	allowed	allow	Act	act	the Patriot Act	OBJECT	1	NO	NO
RTE6-DEV	NO	cb848b6a-72a0-4f9d-b4ea-5fc1af95f865	D0922	NYT_ENG_20050214.0176	2	187	allowed	allow	powers	power	powers	OBJECT	1	NO	NO
RTE6-DEV	NO	1521b618-4409-4675-a8e0-c2a58726a05b	D0922	NYT_ENG_20050322.0262	3	187	allowed	allow	Act	act	the Patriot Act	OBJECT	3	YES	NO
RTE6-DEV	NO	e5f1d38b-6c46-4ec8-a11c-46bc4860b372	D0922	NYT_ENG_20050322.0262	3	187	allowed	allow	powers	power	powers	OBJECT	16	NO	NO
RTE6-DEV	NO	3a116bea-292d-412f-a851-3d207239dc31	D0922	NYT_ENG_20050322.0262	3	187	used	use	powers	power	powers	OBJECT	16	NO	NO
RTE6-DEV	NO	59ec6d70-5e91-4b23-8360-e2a8f3e64fe8	D0922	APW_ENG_20050214.0666	5	192	advocates	advocate	liberties	liberty	civil liberties	OBJECT	5	NO	NO
RTE6-DEV	NO	3d8f9fec-852c-4f4f-bf89-46952a47f513	D0922	APW_ENG_20050317.0771	11	192	advocates	advocate	liberties	liberty	civil liberties	OBJECT	11	NO	NO
RTE6-DEV	NO	1aed6326-eea4-4202-8895-11ac9735efe0	D0922	NYT_ENG_20050322.0262	4	193	passed	pass	resolutions	resolution	resolutions	OBJECT	19	NO	NO
RTE6-DEV	NO	419c7c50-8960-44d5-a78f-832d6036aa8f	D0922	NYT_ENG_20050322.0262	4	193	passed	pass	states	state	4 states	SUBJECT	19	NO	NO
RTE6-DEV	NO	96864212-e7c2-42a1-874d-33ec995519ee	D0922	APW_ENG_20041025.0389	3	194	make	make	Congress	congress	Congress	SUBJECT	7	NO	NO
RTE6-DEV	NO	e00214c2-8c04-48e4-b2ef-fd46a5b4cfc6	D0922	APW_ENG_20050214.0666	9	194	make	make	Congress	congress	Congress	SUBJECT	7	NO	NO
RTE6-DEV	NO	7499f6d1-0f23-42bd-a944-a00702c54fe6	D0922	APW_ENG_20050317.0771	4	194	make	make	Congress	congress	Congress	SUBJECT	17	NO	NO
RTE6-DEV	NO	cb045c63-8a41-443a-95e0-eba987ba8fbe	D0922	APW_ENG_20050323.0358	7	194	expire	expire	provisions	provisions	all provisions of the Patriot Act	SUBJECT	8	YES	YES
RTE6-DEV	NO	643cd92d-920e-4157-99a2-c05d7b023485	D0922	APW_ENG_20050323.0358	7	194	wants	want	administration	administration	The Bush administration	SUBJECT	6	NO	NO
RTE6-DEV	NO	075ef59f-b6c2-4314-a6bb-64a15feda276	D0922	APW_ENG_20050323.0358	1	194	wants	want	administration	administration	The Bush administration	SUBJECT	6	NO	NO
RTE6-DEV	NO	281f8fb6-f628-4684-9b84-80523c2cb784	D0922	LTW_ENG_20050322.0139	7	194	expire	expire	provisions	provisions	all provisions of the Patriot Act	SUBJECT	7	YES	NO
RTE6-DEV	NO	8b57616b-472a-456e-b453-a86b023d402c	D0922	LTW_ENG_20050322.0139	5	194	expire	expire	provisions	provisions	all provisions of the Patriot Act	SUBJECT	6	YES	YES
RTE6-DEV	NO	86f16bfb-ad20-41da-8a75-43586d8e31e2	D0922	NYT_ENG_20050214.0176	7	194	expire	expire	provisions	provisions	all provisions of the Patriot Act	SUBJECT	3	YES	YES
RTE6-DEV	NO	5b46df76-2055-41fe-9a1d-649b6529daca	D0922	NYT_ENG_20050322.0262	27	194	make	make	Congress	congress	Congress	SUBJECT	7	NO	NO
RTE6-DEV	NO	82af858e-ff04-44be-b90e-56aa6feebc15	D0922	LTW_ENG_20050322.0139	1	195	launched	launch	administration	administration	The Bush administration	SUBJECT	4	NO	NO
RTE6-DEV	NO	c09a9920-3bc4-4393-a9e7-a081af619a2b	D0922	APW_ENG_20041112.0362	2	196	expand	expand	Act	act	the Patriot Act	OBJECT	2	NO	NO
RTE6-DEV	NO	42b08b80-ab8f-4ac1-a678-cf40740de446	D0922	APW_ENG_20050323.0358	13	196	expand	expand	Act	act	the Patriot Act	OBJECT	13	NO	NO
RTE6-DEV	NO	36ff1e62-d8d3-46d3-9f04-2d70e9092296	D0922	LTW_ENG_20050322.0139	1	196	launched	launch	administration	administration	The Bush administration	SUBJECT	4	NO	NO
RTE6-DEV	NO	f1743580-6aef-4f8a-846a-a17b937682c8	D0922	LTW_ENG_20050322.0139	9	196	expand	expand	Act	act	the Patriot Act	OBJECT	9	YES	YES
RTE6-DEV	NO	c71ecc4f-6de0-4c24-bfd7-aaf5be9cf3a8	D0922	NYT_ENG_20050322.0262	24	196	expand	expand	Act	act	the Patriot Act	OBJECT	24	YES	YES
RTE6-DEV	NO	7f4c05f9-2eb6-462b-bf42-c76410c2f34c	D0924	APW_ENG_20041021.0243	2	147	maker	maker	Vioxx	vioxx	Vioxx	OBJECT	1	YES	YES
RTE6-DEV	NO	9d5025c9-ba78-433c-a11e-00cc436c01b3	D0924	APW_ENG_20041101.0307	16	147	maker	maker	Vioxx	vioxx	Vioxx	OBJECT	17	NO	NO
RTE6-DEV	NO	dc451b91-cc0b-4415-8c42-474a1272e5da	D0924	NYT_ENG_20041104.0279	20	147	maker	maker	Vioxx	vioxx	Vioxx	OBJECT	19	NO	NO
RTE6-DEV	NO	7bb74ed6-0b08-48e0-ac48-40d5459aadd2	D0924	NYT_ENG_20041104.0279	26	147	maker	maker	Vioxx	vioxx	Vioxx	OBJECT	31	NO	NO
RTE6-DEV	NO	94b7634f-9201-4875-acbe-838aed65fb43	D0924	NYT_ENG_20041104.0279	41	147	maker	maker	Vioxx	vioxx	Vioxx	OBJECT	41	NO	NO
RTE6-DEV	NO	b84c4580-8e95-4fa7-b9e4-b526c4e932e2	D0924	NYT_ENG_20041104.0279	23	147	maker	maker	Vioxx	vioxx	Vioxx	OBJECT	19	NO	NO
RTE6-DEV	NO	1dfc13ae-b28c-4ab0-ab20-22dbfdee11b3	D0924	NYT_ENG_20041104.0279	28	147	maker	maker	Vioxx	vioxx	Vioxx	OBJECT	31	NO	NO
RTE6-DEV	NO	3952634d-945d-48d0-ae16-787283569f3d	D0924	APW_ENG_20041101.0307	10	151	approved	approve	Vioxx	vioxx	Vioxx	OBJECT	9	NO	NO
RTE6-DEV	NO	b012a9f1-66ff-49c3-b030-623e7635e080	D0924	APW_ENG_20041101.0307	10	151	approved	approve	FDA	fda	the FDA	SUBJECT	10	YES	YES
RTE6-DEV	NO	b9807c5e-0ef3-4058-ab2f-63334f8b356b	D0924	NYT_ENG_20041004.0309	18	151	approved	approve	Vioxx	vioxx	Vioxx	OBJECT	18	YES	YES
RTE6-DEV	NO	680b4d4e-c047-40f7-82f8-6998c4f3cfe8	D0924	NYT_ENG_20041004.0309	18	151	approved	approve	1999	1999	1999	OBJECT	35	YES	NO
RTE6-DEV	NO	212db14b-e403-4b88-a943-a1a960f5fa55	D0924	NYT_ENG_20041006.0378	24	151	approved	approve	FDA	fda	the FDA	SUBJECT	20	YES	NO
RTE6-DEV	NO	53f603c6-63a1-45b4-884f-d74b689e3235	D0924	NYT_ENG_20041006.0378	30	151	approved	approve	Vioxx	vioxx	Vioxx	OBJECT	28	NO	NO
RTE6-DEV	NO	bcb85feb-310b-49ed-a3e1-b36dd08b48c1	D0924	NYT_ENG_20041006.0378	30	151	approved	approve	FDA	fda	the FDA	SUBJECT	31	YES	NO
RTE6-DEV	NO	64f3f584-6629-4ffc-acdc-c991ebaf8a29	D0924	NYT_ENG_20041104.0279	26	151	approved	approve	Vioxx	vioxx	Vioxx	OBJECT	31	NO	NO
RTE6-DEV	NO	f0f571c8-c0ab-4a9f-a7c3-23cfb1a5865c	D0924	NYT_ENG_20041104.0279	26	151	approved	approve	FDA	fda	the FDA	SUBJECT	26	YES	NO
RTE6-DEV	NO	bce3f078-23d1-4da3-8f2f-07e86f8575be	D0924	NYT_ENG_20041104.0279	26	151	approved	approve	1999	1999	1999	OBJECT	17	NO	NO
RTE6-DEV	NO	2c54eea6-675b-40e6-9e50-60872903ebc8	D0924	AFP_ENG_20041001.0380	6	153	withdrew	withdraw	Merck	merck	Merck	SUBJECT	2	NO	NO
RTE6-DEV	NO	63ea2381-0f87-41e3-8f1d-baaf75e70294	D0924	AFP_ENG_20041001.0380	6	153	withdrew	withdraw	Vioxx	vioxx	Vioxx	OBJECT	6	YES	YES
RTE6-DEV	NO	6ac54c4b-3e92-4fa0-95f3-0960c1c859ae	D0924	NYT_ENG_20041004.0309	23	153	withdrew	withdraw	Merck	merck	Merck	SUBJECT	23	YES	YES
RTE6-DEV	NO	9d1b5019-0167-4efd-a071-f5122f632fd4	D0924	NYT_ENG_20041004.0309	27	153	withdrew	withdraw	Merck	merck	Merck	SUBJECT	27	YES	NO
RTE6-DEV	NO	964dc28a-ddd2-41c5-9013-f34cca0d334a	D0924	NYT_ENG_20041004.0309	27	153	withdrew	withdraw	market	market	the market	OBJECT	23	YES	NO
RTE6-DEV	NO	5b299a95-3c40-4466-ad35-9ca35354612b	D0924	NYT_ENG_20041004.0309	12	153	withdrew	withdraw	market	market	the market	OBJECT	23	YES	NO
RTE6-DEV	NO	322516d5-8d12-48b6-a352-f6ce7cabeed2	D0924	NYT_ENG_20041004.0309	31	153	withdrew	withdraw	Merck	merck	Merck	SUBJECT	32	YES	NO
RTE6-DEV	NO	487a9575-2459-459a-abb1-70803fd10662	D0924	NYT_ENG_20041004.0309	31	153	withdrew	withdraw	market	market	the market	OBJECT	23	YES	NO
RTE6-DEV	NO	8cd938d8-bac0-4c4c-abc3-819a69eae447	D0924	NYT_ENG_20041006.0378	45	153	withdrew	withdraw	Merck	merck	Merck	SUBJECT	47	YES	NO
RTE6-DEV	NO	7a0c1560-67f8-4d1d-be9b-e32c15b91f6f	D0924	NYT_ENG_20041006.0378	45	153	withdrew	withdraw	market	market	the market	OBJECT	40	YES	NO
RTE6-DEV	NO	760e5a07-1d63-4518-a8af-e7a42fdecd37	D0924	NYT_ENG_20041104.0279	12	153	withdrew	withdraw	Merck	merck	Merck	SUBJECT	12	YES	NO
RTE6-DEV	NO	c2143332-3577-4e2d-96ea-c978156f3d60	D0924	NYT_ENG_20041104.0279	12	153	withdrew	withdraw	Vioxx	vioxx	Vioxx	OBJECT	12	YES	YES
RTE6-DEV	NO	3fddab1b-56c2-4e07-b1b0-b7d55799b10e	D0924	NYT_ENG_20041104.0279	12	153	withdrew	withdraw	market	market	the market	OBJECT	7	YES	NO
RTE6-DEV	NO	89f360e9-9250-474a-bbe5-ec88a8abdebf	D0924	APW_ENG_20041021.0243	4	154	pulled	pull	Merck	merck	Merck	SUBJECT	2	YES	NO
RTE6-DEV	NO	2453e30e-8b02-49d0-afbb-e1c7940de676	D0924	APW_ENG_20041021.0243	4	154	pulled	pull	Vioxx	vioxx	Vioxx	OBJECT	4	YES	YES
RTE6-DEV	NO	3931be03-f4f8-43f8-abbe-3883f1be6c76	D0924	NYT_ENG_20041006.0378	40	154	pulled	pull	Merck	merck	Merck	SUBJECT	33	YES	NO
RTE6-DEV	NO	fccd8359-872c-4ba8-9316-b183e40f72c8	D0924	NYT_ENG_20041006.0378	40	154	pulled	pull	market	market	the market	OBJECT	40	YES	NO
RTE6-DEV	NO	27eb5696-6ec9-4cc0-af01-d5161547fff2	D0924	NYT_ENG_20041104.0279	34	154	pulled	pull	market	market	the market	OBJECT	35	YES	NO
RTE6-DEV	NO	fede73de-a127-4f50-bdfb-6fec76f2d99d	D0924	NYT_ENG_20041104.0279	9	154	pulled	pull	Merck	merck	Merck	SUBJECT	9	YES	YES
RTE6-DEV	NO	b5dd88d4-5ea6-400c-94bc-8d2afa075b94	D0924	NYT_ENG_20041104.0279	9	154	pulled	pull	Vioxx	vioxx	Vioxx	OBJECT	7	YES	YES
RTE6-DEV	NO	c1d2d61e-8ad9-4063-84d5-ad61ff9dbdf9	D0924	NYT_ENG_20041104.0279	9	154	pulled	pull	market	market	the market	OBJECT	7	YES	NO
RTE6-DEV	NO	7fa24d43-84a7-4744-9a04-6d984801dd45	D0924	AFP_ENG_20041008.0499	1	155	risk	risk	attacks	attack	heart attacks	UNKNOWN	1	YES	NO
RTE6-DEV	NO	1c819954-3d77-4994-9ae0-8faea970c13e	D0924	AFP_ENG_20041008.0499	5	155	risk	risk	attacks	attack	heart attacks	UNKNOWN	3	YES	NO
RTE6-DEV	NO	d546225c-7452-4588-95b7-3ce139316d7b	D0924	AFP_ENG_20041021.0497	14	155	use	use	Vioxx	vioxx	Vioxx	OBJECT	13	YES	YES
RTE6-DEV	NO	8933feb3-071c-484c-8b8e-39f7ed942c08	D0924	AFP_ENG_20041103.0497	9	155	use	use	Vioxx	vioxx	Vioxx	OBJECT	10	YES	NO
RTE6-DEV	NO	ce751186-4bc6-42bb-8347-0a545d7d06fa	D0924	APW_ENG_20041101.0307	12	155	increased	increase	risk	risk	the risk of heart attacks	OBJECT	12	YES	NO
RTE6-DEV	NO	bc34ec55-5a8b-4769-8962-f530c661eed7	D0924	APW_ENG_20041101.0307	0	155	risk	risk	attacks	attack	heart attacks	UNKNOWN	12	YES	NO
RTE6-DEV	NO	f8261621-e18c-4924-b6f5-41c085cdebd7	D0924	NYT_ENG_20041004.0309	14	155	use	use	Vioxx	vioxx	Vioxx	OBJECT	14	YES	NO
RTE6-DEV	NO	165a1e34-8dad-4c40-a02a-3097bfe951ba	D0924	NYT_ENG_20041004.0309	17	155	found	find	use	use	use of Vioxx	OBJECT	14	NO	NO
RTE6-DEV	NO	dce647ef-7519-4c07-a3ff-19792e03a533	D0924	NYT_ENG_20041004.0309	20	155	found	find	use	use	use of Vioxx	OBJECT	21	NO	NO
RTE6-DEV	NO	2e97e127-e94c-4b79-b039-a184bdecb8c8	D0924	NYT_ENG_20041004.0309	31	155	risk	risk	attacks	attack	heart attacks	UNKNOWN	23	YES	NO
RTE6-DEV	NO	32e71ace-1972-467e-bde4-366d85088e92	D0924	NYT_ENG_20041004.0309	15	155	risk	risk	attacks	attack	heart attacks	UNKNOWN	14	YES	YES
RTE6-DEV	NO	928837bf-5cc1-4bd9-92a6-d2bd5ff560e4	D0924	NYT_ENG_20041004.0309	33	155	risk	risk	attacks	attack	heart attacks	UNKNOWN	23	YES	YES
RTE6-DEV	NO	0e927267-5f80-4884-b812-48dce79e24b3	D0924	NYT_ENG_20041006.0378	46	155	found	find	use	use	use of Vioxx	OBJECT	49	NO	NO
RTE6-DEV	NO	3e558322-949c-401a-b9d4-b30e9f5b7751	D0924	NYT_ENG_20041006.0378	46	155	risk	risk	attacks	attack	heart attacks	UNKNOWN	43	YES	YES
RTE6-DEV	NO	38d0ec32-0384-4c39-8c1b-bbd65f96a9b8	D0924	NYT_ENG_20041006.0378	29	155	increased	increase	risk	risk	the risk of heart attacks	OBJECT	29	YES	NO
RTE6-DEV	NO	95cce269-e64e-49e7-85f4-d18513485ec6	D0924	NYT_ENG_20041006.0378	29	155	increased	increase	use	use	use of Vioxx	OBJECT	31	NO	NO
RTE6-DEV	NO	fb0ccf34-ffd6-4980-9df5-4a7af4b559c6	D0924	NYT_ENG_20041006.0378	29	155	risk	risk	attacks	attack	heart attacks	UNKNOWN	19	YES	YES
RTE6-DEV	NO	0c40833e-324b-4a34-a57a-831dfc9ee42e	D0924	NYT_ENG_20041006.0378	49	155	use	use	Vioxx	vioxx	Vioxx	OBJECT	47	YES	YES
RTE6-DEV	NO	6ecddfcc-ded1-4b2b-ba02-2ced5fe644c8	D0924	NYT_ENG_20041006.0378	49	155	risk	risk	attacks	attack	heart attacks	UNKNOWN	43	NO	NO
RTE6-DEV	NO	e7d4778c-f553-411f-a82c-dd58d709a199	D0924	NYT_ENG_20041006.0378	26	155	increased	increase	risk	risk	the risk of heart attacks	OBJECT	26	YES	NO
RTE6-DEV	NO	d491b238-27cf-49bf-9dc5-d01cf22e6ed4	D0924	NYT_ENG_20041006.0378	26	155	increased	increase	use	use	use of Vioxx	OBJECT	31	NO	NO
RTE6-DEV	NO	ec4157cd-7ecd-4602-9327-3013408ba160	D0924	NYT_ENG_20041006.0378	26	155	risk	risk	attacks	attack	heart attacks	UNKNOWN	19	YES	NO
RTE6-DEV	NO	bde67e2d-a76a-4aa1-b2c5-83f8fd8b1583	D0924	NYT_ENG_20041006.0378	41	155	found	find	study	study	A study	SUBJECT	43	YES	YES
RTE6-DEV	NO	0fde894e-1da2-4b8c-92a5-35983cd05224	D0924	NYT_ENG_20041006.0378	41	155	found	find	use	use	use of Vioxx	OBJECT	49	NO	NO
RTE6-DEV	NO	8aba789c-565a-4b04-bad2-2d28b8535ae6	D0924	NYT_ENG_20041006.0378	41	155	increased	increase	risk	risk	the risk of heart attacks	OBJECT	41	YES	NO
RTE6-DEV	NO	616ff57a-3056-4d8f-9887-8b748b5e798c	D0924	NYT_ENG_20041006.0378	41	155	increased	increase	use	use	use of Vioxx	OBJECT	49	YES	NO
RTE6-DEV	NO	1c6f6bf4-8e4e-462b-8433-2b7f2553f798	D0924	NYT_ENG_20041006.0378	41	155	risk	risk	attacks	attack	heart attacks	UNKNOWN	43	YES	NO
RTE6-DEV	NO	3fb5827a-d8e5-4527-87d9-59060f823449	D0924	NYT_ENG_20041006.0378	47	155	risk	risk	attacks	attack	heart attacks	UNKNOWN	43	YES	NO
RTE6-DEV	NO	27f24ec4-8433-4bb3-a1c8-85d6f091d4bc	D0924	NYT_ENG_20041006.0378	32	155	risk	risk	attacks	attack	heart attacks	UNKNOWN	43	YES	YES
RTE6-DEV	NO	ff2bee24-419e-4e19-945c-b875f889f80b	D0924	NYT_ENG_20041104.0279	41	155	risk	risk	attacks	attack	heart attacks	UNKNOWN	41	YES	YES
RTE6-DEV	NO	1b723cb0-37df-436b-a53c-b773e955be4c	D0924	NYT_ENG_20041104.0279	9	155	risk	risk	attacks	attack	heart attacks	UNKNOWN	7	YES	NO
RTE6-DEV	NO	28a7ae85-3600-49bc-8896-327b6eee3af1	D0924	NYT_ENG_20041104.0279	40	155	use	use	Vioxx	vioxx	Vioxx	OBJECT	40	YES	YES
RTE6-DEV	NO	9009fba0-ae3e-434c-b91c-b96290ee3964	D0924	NYT_ENG_20041104.0279	19	155	use	use	Vioxx	vioxx	Vioxx	OBJECT	19	NO	NO
RTE6-DEV	NO	23c70cf9-0570-4afa-915c-ee6f955cdef2	D0924	APW_ENG_20041021.0243	4	160	pull	pull	Merck	merck	Merck	SUBJECT	2	YES	NO
RTE6-DEV	NO	d6edc040-451b-49cf-9e6b-e0fc0c39bdf6	D0924	APW_ENG_20041021.0243	4	160	pull	pull	Vioxx	vioxx	Vioxx	OBJECT	4	YES	YES
RTE6-DEV	NO	448558be-10c7-4ede-aa34-226387b0fc03	D0924	APW_ENG_20041101.0307	2	160	pull	pull	Vioxx	vioxx	Vioxx	OBJECT	1	YES	YES
RTE6-DEV	NO	5e1c32e8-388f-4779-b98c-2e96278dbffd	D0924	NYT_ENG_20041104.0279	34	160	pull	pull	market	market	the market	OBJECT	35	YES	NO
RTE6-DEV	NO	a3b205a1-c0d4-45c2-92b1-e3f8f64f2d2a	D0924	AFP_ENG_20041008.0499	1	161	taking	take	months	month	18 months	OBJECT	3	YES	NO
RTE6-DEV	NO	aaa9c20f-81fd-458b-8a37-ec6443efde28	D0924	AFP_ENG_20041021.0497	10	161	taking	take	months	month	18 months	OBJECT	4	NO	NO
RTE6-DEV	NO	a2e6928b-b7ab-4727-bd5e-e50ff86d7298	D0924	APW_ENG_20041101.0307	17	161	developed	develop	patients	patient	Some patients	SUBJECT	2	NO	NO
RTE6-DEV	NO	c5053de8-ad5c-47db-ad01-54df8a2a1944	D0924	APW_ENG_20041101.0307	17	161	developed	develop	problems	problem	serious cardiovascular problems	OBJECT	1	NO	NO
RTE6-DEV	NO	7c7716f1-5bcb-4f30-bdf8-17b7fd46ed8b	D0924	APW_ENG_20041101.0307	8	161	taking	take	Vioxx	vioxx	Vioxx	OBJECT	8	NO	NO
RTE6-DEV	NO	1582833c-d546-409a-8b26-80280a18b38e	D0924	APW_ENG_20041101.0307	8	161	taking	take	months	month	18 months	OBJECT	6	NO	NO
RTE6-DEV	NO	15735df8-7452-4f23-a654-69fd942eb584	D0924	APW_ENG_20041101.0307	3	161	taking	take	months	month	18 months	OBJECT	6	NO	NO
RTE6-DEV	NO	6b980912-f862-4050-85a1-2bd7fa734ca0	D0924	NYT_ENG_20041004.0309	33	161	taking	take	Vioxx	vioxx	Vioxx	OBJECT	33	YES	YES
RTE6-DEV	NO	17d65d73-fb68-4c46-92eb-978cf9c11bf1	D0924	NYT_ENG_20041004.0309	6	161	taking	take	months	month	18 months	OBJECT	5	NO	NO
RTE6-DEV	NO	e39fc6d3-f6e7-4992-b7a5-4f8fd05f9803	D0924	NYT_ENG_20041004.0309	2	161	taking	take	Vioxx	vioxx	Vioxx	OBJECT	2	YES	YES
RTE6-DEV	NO	e46c9bd4-3a53-416c-8014-aba48ecac82d	D0924	NYT_ENG_20041004.0309	2	161	taking	take	months	month	18 months	OBJECT	5	NO	NO
RTE6-DEV	NO	e6f69494-e87c-4a7f-bc6d-2b34c59e5fe9	D0924	NYT_ENG_20041006.0378	46	161	taking	take	Vioxx	vioxx	Vioxx	OBJECT	46	YES	NO
RTE6-DEV	NO	f119c8db-bc9b-4e89-9804-0f184f3f00c1	D0924	NYT_ENG_20041006.0378	46	161	taking	take	months	month	18 months	OBJECT	41	YES	NO
RTE6-DEV	NO	a7114c9b-6bdb-407c-ae59-22977953c102	D0924	NYT_ENG_20041006.0378	3	161	taking	take	months	month	18 months	OBJECT	5	YES	NO
RTE6-DEV	NO	62b10488-f4e0-4d9d-9039-e080c9272eb8	D0924	NYT_ENG_20041006.0378	43	161	taking	take	months	month	18 months	OBJECT	41	YES	NO
RTE6-DEV	NO	ba8211ca-33c5-46a7-9bbb-c1933fa745cf	D0924	NYT_ENG_20041006.0378	29	161	taking	take	Vioxx	vioxx	Vioxx	OBJECT	28	NO	NO
RTE6-DEV	NO	b715a0d2-74a0-46b9-9487-aa99736c5b84	D0924	NYT_ENG_20041006.0378	29	161	taking	take	months	month	18 months	OBJECT	41	NO	NO
RTE6-DEV	NO	2b1c27b9-1534-4287-a3b4-4e043ff5f59f	D0924	NYT_ENG_20041006.0378	1	161	taking	take	Vioxx	vioxx	Vioxx	OBJECT	1	YES	YES
RTE6-DEV	NO	a8ae05ce-e2c6-4a36-b28a-04fafe18c9be	D0924	NYT_ENG_20041006.0378	1	161	taking	take	months	month	18 months	OBJECT	5	YES	NO
RTE6-DEV	NO	a9a752c2-6381-4119-ab87-d290adf56f00	D0924	NYT_ENG_20041104.0279	11	161	taking	take	Vioxx	vioxx	Vioxx	OBJECT	11	NO	NO
RTE6-DEV	NO	58ed9cd5-a549-4a67-8e73-7f0442ea0033	D0924	NYT_ENG_20041104.0279	11	161	taking	take	months	month	18 months	OBJECT	15	NO	NO
RTE6-DEV	NO	4ad8bf98-0e3a-4685-a7d3-c36655d8859c	D0924	NYT_ENG_20041104.0279	32	161	taking	take	Vioxx	vioxx	Vioxx	OBJECT	32	NO	NO
RTE6-DEV	NO	883ae7cf-35a1-46ee-a5c1-a83f8eeab3fb	D0924	NYT_ENG_20041104.0279	32	161	taking	take	months	month	18 months	OBJECT	37	NO	NO
RTE6-DEV	NO	c256c775-2e42-40f1-8137-5dd08ad6b96d	D0924	NYT_ENG_20041104.0279	13	161	taking	take	months	month	18 months	OBJECT	15	NO	NO
RTE6-DEV	NO	7834f8e2-e7d7-4b52-8148-d75ab4cf0048	D0924	NYT_ENG_20041104.0279	41	161	taking	take	Vioxx	vioxx	Vioxx	OBJECT	41	YES	NO
RTE6-DEV	NO	a6fa8a13-571d-4b70-8b8f-54e620e5fa2b	D0924	NYT_ENG_20041104.0279	41	161	taking	take	months	month	18 months	OBJECT	37	YES	NO
RTE6-DEV	NO	5677a9ff-5dbe-4558-bca2-72f8ab4898cc	D0924	NYT_ENG_20041104.0279	34	161	taking	take	Vioxx	vioxx	Vioxx	OBJECT	34	NO	NO
RTE6-DEV	NO	042e551a-9b01-4de8-a1c0-02cbd34af6a1	D0924	NYT_ENG_20041104.0279	34	161	taking	take	months	month	18 months	OBJECT	37	NO	NO
RTE6-DEV	NO	83fe28dc-f4d5-4e24-946c-d08975f57ae4	D0924	APW_ENG_20041021.0243	0	163	fell	fall	down	down	down	MODIFIER	3	YES	NO
RTE6-DEV	NO	a3f93edf-77db-4042-9495-739da5a57cc4	D0924	AFP_ENG_20041008.0499	3	164	pulled	pull	market	market	the market	OBJECT	1	YES	NO
RTE6-DEV	NO	d0c2cba1-75ea-4afe-b5b3-d12616752df3	D0924	APW_ENG_20041021.0243	4	164	pulled	pull	Vioxx	vioxx	Vioxx	OBJECT	4	YES	YES
RTE6-DEV	NO	1cdf8430-3ae4-4071-9786-b2b10491e784	D0924	APW_ENG_20041101.0307	2	164	pulled	pull	Vioxx	vioxx	Vioxx	OBJECT	1	YES	YES
RTE6-DEV	NO	0b2b0112-5ff0-41ca-b8ea-9d88f4b2bccb	D0924	NYT_ENG_20041006.0378	40	164	pulled	pull	market	market	the market	OBJECT	40	YES	NO
RTE6-DEV	NO	668b1dac-9de2-42b5-8a1e-f1ff3737719c	D0924	NYT_ENG_20041006.0378	40	164	pulled	pull	earlier	earlier	4 years earlier	MODIFIER	41	YES	NO
RTE6-DEV	NO	d0d9015f-1cd1-4a5c-93ea-cc6889077e31	D0924	NYT_ENG_20041104.0279	34	164	pulled	pull	market	market	the market	OBJECT	35	YES	NO
RTE6-DEV	NO	f236c1b2-0b97-4969-9fda-bb019aaab2fb	D0924	NYT_ENG_20041104.0279	9	164	pulled	pull	Vioxx	vioxx	Vioxx	OBJECT	7	YES	YES
RTE6-DEV	NO	58726e7e-d9e4-431a-904b-a86e75f51b54	D0924	NYT_ENG_20041104.0279	9	164	pulled	pull	market	market	the market	OBJECT	7	YES	NO
RTE6-DEV	NO	1fbfa5fa-3dde-4e15-812b-e4abe3172617	D0924	AFP_ENG_20041021.0497	12	165	disputed	dispute	Merck	merck	Merck	SUBJECT	12	NO	NO
RTE6-DEV	NO	30300ca7-c5f0-4eaa-b497-4971e20491db	D0924	AFP_ENG_20041103.0497	6	165	disputed	dispute	Merck	merck	Merck	SUBJECT	5	NO	NO
RTE6-DEV	NO	2744c081-bb11-419e-accf-3ca43d33d017	D0924	NYT_ENG_20041104.0279	12	165	conclusion	conclusion	Lancet	lancet	The Lancet	UNKNOWN	12	YES	NO
RTE6-DEV	NO	2d795881-6167-4191-99b6-c4e476eedb48	D0924	NYT_ENG_20041104.0279	47	167	handling	handling	Merck	merck	Merck 's	UNKNOWN	47	NO	NO
RTE6-DEV	NO	47fbc4a5-5e6a-48b1-bce7-5cf8cbd3048a	D0924	NYT_ENG_20041104.0279	47	167	handling	handling	Vioxx	vioxx	Vioxx	OBJECT	50	NO	NO
RTE6-DEV	NO	bdcc03df-0569-4ce8-81bf-fab8b57585b4	D0924	AFP_ENG_20041008.0499	1	168	filed	file	Merck	merck	Merck	OBJECT	1	YES	NO
RTE6-DEV	NO	914cf352-7f70-4e24-8a7b-41414d8ea31d	D0924	AFP_ENG_20041008.0499	5	168	filed	file	lawsuit	lawsuit	a federal lawsuit	OBJECT	1	YES	YES
RTE6-DEV	NO	360743e4-2952-42de-9768-408884224063	D0924	AFP_ENG_20041008.0499	2	168	filed	file	lawsuit	lawsuit	a federal lawsuit	OBJECT	1	YES	YES
RTE6-DEV	NO	fd52634c-8a5d-42ba-b611-dbf0d3c91b5f	D0924	AFP_ENG_20041008.0499	2	168	filed	file	Merck	merck	Merck	OBJECT	1	YES	NO
RTE6-DEV	NO	6318cf7d-448c-4a25-9960-5be2d961cc33	D0924	AFP_ENG_20041021.0497	12	168	filed	file	Merck	merck	Merck	OBJECT	12	YES	NO
RTE6-DEV	NO	41ec8fda-05f0-4124-af5f-a9a2420b5d24	D0924	AFP_ENG_20041021.0497	16	168	filed	file	lawsuit	lawsuit	a federal lawsuit	OBJECT	14	YES	YES
RTE6-DEV	NO	84931cef-04bd-4305-a796-b4f83b843895	D0924	AFP_ENG_20041021.0497	16	168	filed	file	Merck	merck	Merck	OBJECT	16	YES	NO
RTE6-DEV	NO	3bf3dafc-2e76-4650-845e-a1eedf8d458d	D0924	APW_ENG_20041021.0243	1	168	filed	file	Merck	merck	Merck	OBJECT	1	YES	NO
RTE6-DEV	NO	632c7261-66c2-40ec-bd53-0d129f4cf18b	D0924	NYT_ENG_20041004.0309	4	168	filed	file	lawsuit	lawsuit	a federal lawsuit	OBJECT	4	YES	YES
RTE6-DEV	NO	3bfddea6-4dec-412b-b313-d5abb100bb4a	D0924	NYT_ENG_20041004.0309	27	168	filed	file	lawsuit	lawsuit	a federal lawsuit	OBJECT	26	YES	YES
RTE6-DEV	NO	b7d76aa4-2ad3-4cb5-879c-c3f21d1a9484	D0924	NYT_ENG_20041004.0309	2	168	filed	file	lawsuit	lawsuit	a federal lawsuit	OBJECT	2	YES	NO
RTE6-DEV	NO	277cbf73-2761-4025-b847-5eb6383ecdde	D0924	NYT_ENG_20041004.0309	2	168	filed	file	Merck	merck	Merck	OBJECT	1	YES	NO
RTE6-DEV	NO	6e2e7182-4e70-4284-b0ec-35eae2bb185a	D0924	NYT_ENG_20041004.0309	3	168	filed	file	lawsuit	lawsuit	a federal lawsuit	OBJECT	2	YES	YES
RTE6-DEV	NO	cfabb2cc-7d72-4fa4-adff-ed810162c274	D0924	NYT_ENG_20041004.0309	29	168	filed	file	lawsuit	lawsuit	a federal lawsuit	OBJECT	28	YES	YES
RTE6-DEV	NO	6fa28678-8e54-4537-90cf-6422402a96df	D0924	NYT_ENG_20041004.0309	29	168	filed	file	Merck	merck	Merck	OBJECT	28	YES	NO
RTE6-DEV	NO	300f520a-7ecc-49a5-9353-86ee4955e3fe	D0924	NYT_ENG_20041104.0279	30	168	filed	file	fund	fund	The pension fund of New York State	SUBJECT	21	NO	NO
RTE6-DEV	NO	1e592d70-be0a-4606-96c7-fcde4822c3c6	D0924	NYT_ENG_20041104.0279	30	168	filed	file	lawsuit	lawsuit	a federal lawsuit	OBJECT	30	YES	NO
RTE6-DEV	NO	1420126e-5863-4942-b815-a3c672df6c4e	D0924	NYT_ENG_20041104.0279	30	168	filed	file	Merck	merck	Merck	OBJECT	30	YES	NO
RTE6-DEV	NO	ce85a244-10bf-48b0-9f71-40ae15f9422b	D0924	NYT_ENG_20041104.0279	31	168	filed	file	fund	fund	The pension fund of New York State	SUBJECT	21	NO	NO
RTE6-DEV	NO	4a4ffd57-f21e-494a-b8cc-d57bd289cd35	D0924	NYT_ENG_20041104.0279	31	168	filed	file	Merck	merck	Merck	OBJECT	31	YES	NO
RTE6-DEV	NO	fee2fdfb-07c8-419f-9dd2-30e74d3ee2ea	D0924	NYT_ENG_20041104.0279	7	168	filed	file	fund	fund	The pension fund of New York State	SUBJECT	21	NO	NO
RTE6-DEV	NO	e3ecfe45-882c-4d78-b45d-7524b55ba77a	D0924	NYT_ENG_20041104.0279	7	168	filed	file	Merck	merck	Merck	OBJECT	7	YES	NO
RTE6-DEV	NO	b1228ba7-d727-473e-8f03-7a6da035417c	D0924	NYT_ENG_20041104.0279	21	168	fund	fund	State	state	New York State	SUBJECT	27	NO	NO
RTE6-DEV	NO	f582f849-ac74-4b7f-92c9-67acadffb215	D0924	NYT_ENG_20041104.0279	48	168	filed	file	fund	fund	The pension fund of New York State	SUBJECT	21	NO	NO
RTE6-DEV	NO	89c08a28-3872-473a-b7d0-9286f389c34b	D0924	NYT_ENG_20041104.0279	48	168	filed	file	lawsuit	lawsuit	a federal lawsuit	OBJECT	47	NO	NO
RTE6-DEV	NO	88e4f293-4880-498d-8151-c1f1962ffd09	D0924	NYT_ENG_20041104.0279	48	168	filed	file	Merck	merck	Merck	OBJECT	47	NO	NO
RTE6-DEV	NO	5646c718-e87f-4bac-9668-379a2b07b19b	D0924	NYT_ENG_20041104.0279	39	168	filed	file	fund	fund	The pension fund of New York State	SUBJECT	21	NO	NO
RTE6-DEV	NO	24a3afe1-51e6-4ff1-b040-03f0d30a4343	D0924	NYT_ENG_20041104.0279	39	168	filed	file	lawsuit	lawsuit	a federal lawsuit	OBJECT	31	YES	YES
RTE6-DEV	NO	21ee4613-dfb4-49a9-abb8-e1865698c869	D0924	NYT_ENG_20041104.0279	39	168	filed	file	Merck	merck	Merck	OBJECT	38	YES	NO
RTE6-DEV	NO	22ba3f6f-19fe-41b7-ae0b-ce805ffdfde4	D0927	APW_ENG_20050406.0006	30	224	died	die	Jennings	jennings	Peter Jennings	SUBJECT	29	NO	NO
RTE6-DEV	NO	1d6cea01-c87a-4928-8fd8-4c7a49a524c3	D0927	LTW_ENG_20050406.0071	23	224	died	die	Jennings	jennings	Peter Jennings	SUBJECT	23	NO	NO
RTE6-DEV	NO	7ef2559c-7c7c-48f0-9582-c6dba49831e4	D0927	APW_ENG_20050406.0006	30	225	died	die	Jennings	jennings	Peter Jennings	SUBJECT	29	NO	NO
RTE6-DEV	NO	7b76da9d-6621-42da-a4e5-11de6b3f5c1a	D0927	APW_ENG_20050406.0006	30	226	died	die	Jennings	jennings	Peter Jennings	SUBJECT	29	NO	NO
RTE6-DEV	NO	b0688674-71d9-46d9-a20b-dcc9f08b5518	D0927	LTW_ENG_20050406.0071	23	226	died	die	Jennings	jennings	Peter Jennings	SUBJECT	23	NO	NO
RTE6-DEV	NO	7281c839-8bcf-43ec-a047-105a7f72cbed	D0927	LTW_ENG_20050406.0071	23	226	died	die	cancer	cancer	lung cancer	OBJECT	5	NO	NO
RTE6-DEV	NO	3a355b05-3ba6-4c65-9fde-98c0c205b9e3	D0927	NYT_ENG_20050405.0268	22	226	died	die	Jennings	jennings	Peter Jennings	SUBJECT	18	NO	NO
RTE6-DEV	NO	8bc25f2c-b5d5-402c-b9e9-e41964abdc6b	D0927	APW_ENG_20050406.0006	30	227	died	die	Jennings	jennings	Peter Jennings	SUBJECT	29	NO	NO
RTE6-DEV	NO	d876e2ee-60f3-44d7-8848-25a3d2a81fec	D0927	LTW_ENG_20050406.0071	23	227	died	die	Jennings	jennings	Peter Jennings	SUBJECT	23	NO	NO
RTE6-DEV	NO	32c1caf9-fe06-44e8-bb1d-814177762746	D0927	APW_ENG_20050406.0006	13	228	diagnosed	diagnose	cancer	cancer	lung cancer	OBJECT	13	YES	YES
RTE6-DEV	NO	2126be83-4287-498f-adff-68a0a40399a7	D0927	APW_ENG_20050406.0006	30	228	died	die	Jennings	jennings	Peter Jennings	SUBJECT	29	NO	NO
RTE6-DEV	NO	60ac200b-ab4c-4cb6-b3fc-8f3bca634253	D0927	APW_ENG_20050406.0006	30	228	died	die	months	month	4 months	MODIFIER	25	NO	NO
RTE6-DEV	NO	ef963491-4ff5-4a99-a195-ff1b73098b54	D0927	APW_ENG_20050406.0006	19	228	diagnosed	diagnose	cancer	cancer	lung cancer	OBJECT	19	YES	NO
RTE6-DEV	NO	dbea8647-e8cc-47de-a6e2-8f16c2078503	D0927	LTW_ENG_20050406.0036	25	228	diagnosed	diagnose	cancer	cancer	lung cancer	OBJECT	24	YES	NO
RTE6-DEV	NO	d9330bfd-ff0b-4998-95aa-85e83c57a6aa	D0927	LTW_ENG_20050406.0036	6	228	diagnosed	diagnose	cancer	cancer	lung cancer	OBJECT	6	YES	NO
RTE6-DEV	NO	8caf4e9c-8873-46ef-a7c8-42430823a24a	D0927	LTW_ENG_20050406.0071	2	228	diagnosed	diagnose	cancer	cancer	lung cancer	OBJECT	1	YES	NO
RTE6-DEV	NO	5db4e5df-7039-4fe6-a44f-ce8d67c09f68	D0927	LTW_ENG_20050429.0144	2	228	diagnosed	diagnose	cancer	cancer	lung cancer	OBJECT	1	YES	NO
RTE6-DEV	NO	84a5d6cb-a393-40c8-9292-2137d339b105	D0927	NYT_ENG_20050405.0089	2	228	diagnosed	diagnose	cancer	cancer	lung cancer	OBJECT	1	YES	NO
RTE6-DEV	NO	ca5446a0-8689-49b2-966a-6b05ab572913	D0927	NYT_ENG_20050405.0268	22	228	diagnosed	diagnose	cancer	cancer	lung cancer	OBJECT	22	YES	NO
RTE6-DEV	NO	be6bc794-c681-4533-9c9b-700f7daab7c4	D0927	NYT_ENG_20050405.0268	22	228	died	die	Jennings	jennings	Peter Jennings	SUBJECT	18	NO	NO
RTE6-DEV	NO	329a8ab7-4153-401f-bdae-5f75fbe29036	D0927	NYT_ENG_20050405.0268	6	228	diagnosed	diagnose	cancer	cancer	lung cancer	OBJECT	6	YES	NO
RTE6-DEV	NO	0196acd3-3a25-4e04-839b-6e4354d8a89b	D0927	LTW_ENG_20050411.0065	13	229	delivered	deliver	Jennings	jennings	Peter Jennings	SUBJECT	7	NO	NO
RTE6-DEV	NO	244d8214-6410-4329-8419-a09248c1e08d	D0927	LTW_ENG_20050411.0065	13	229	delivered	deliver	news	news	the news	OBJECT	15	NO	NO
RTE6-DEV	NO	8fabab4c-e846-4a05-88b6-dc3eedde9733	D0927	LTW_ENG_20050411.0065	13	229	delivered	deliver	to	to	to Americans	MODIFIER	13	NO	NO
RTE6-DEV	NO	ad14aa6e-85ce-4551-81b2-93d2fe627188	D0927	LTW_ENG_20050411.0065	13	229	delivered	deliver	night	night	each night	MODIFIER	4	NO	NO
RTE6-DEV	NO	32561e48-814c-4af5-affa-c7dc768a1b5f	D0927	LTW_ENG_20050412.0022	7	229	delivered	deliver	Jennings	jennings	Peter Jennings	SUBJECT	6	YES	YES
RTE6-DEV	NO	3842a90b-4130-4d18-94ca-6545b2a58aa3	D0927	LTW_ENG_20050412.0022	7	229	delivered	deliver	to	to	to Americans	MODIFIER	7	NO	NO
RTE6-DEV	NO	d503ada5-9e65-4e2c-ab3e-2c34bd80af00	D0927	LTW_ENG_20050412.0022	7	229	delivered	deliver	night	night	each night	MODIFIER	28	YES	NO
RTE6-DEV	NO	2a37b425-5613-4b8e-995d-81f286b1643a	D0927	APW_ENG_20050406.0006	24	236	anchor	anchor	news	news	Peter Jennings was an ABC news	SUBJECT	24	YES	NO
RTE6-DEV	NO	4e683d40-59d6-4f2c-9c98-932b04fa10d2	D0927	LTW_ENG_20050406.0036	8	236	anchor	anchor	news	news	Peter Jennings was an ABC news	SUBJECT	10	YES	NO
RTE6-DEV	NO	5664da9c-96f1-462f-995f-0039553ed5fb	D0927	LTW_ENG_20050411.0065	9	236	anchor	anchor	news	news	Peter Jennings was an ABC news	SUBJECT	9	YES	NO
RTE6-DEV	NO	ff32b353-bf7c-4d3d-af2b-720b0f81f772	D0927	LTW_ENG_20050411.0065	7	236	anchor	anchor	news	news	Peter Jennings was an ABC news	SUBJECT	6	YES	NO
RTE6-DEV	NO	8aef82d4-a0da-4e6c-8dae-3f771c6e3b30	D0927	LTW_ENG_20050411.0065	14	236	anchor	anchor	news	news	Peter Jennings was an ABC news	SUBJECT	15	NO	NO
RTE6-DEV	NO	84f4ce8d-4085-44d1-a46a-39c5b8ea0960	D0927	LTW_ENG_20050412.0022	43	236	anchor	anchor	news	news	Peter Jennings was an ABC news	SUBJECT	43	YES	NO
RTE6-DEV	NO	77c9e65c-8e4a-411c-849c-73ae46cab48b	D0927	LTW_ENG_20050412.0022	23	236	anchor	anchor	news	news	Peter Jennings was an ABC news	SUBJECT	23	YES	NO
RTE6-DEV	NO	b9c81963-be10-4189-856c-d9fbc66ec716	D0927	NYT_ENG_20050405.0152	0	236	anchor	anchor	news	news	Peter Jennings was an ABC news	SUBJECT	2	YES	NO
RTE6-DEV	NO	c1ddd18c-3748-4632-a106-ff457d31adba	D0927	NYT_ENG_20050405.0152	12	236	anchor	anchor	news	news	Peter Jennings was an ABC news	SUBJECT	10	YES	NO
RTE6-DEV	NO	2eac6384-610e-490b-ab7c-62d893a32028	D0927	LTW_ENG_20050406.0071	1	243	announced	announce	Jennings	jennings	Peter Jennings	SUBJECT	1	NO	NO
RTE6-DEV	NO	13125cfc-fce5-4659-9a32-cc5aad355778	D0927	LTW_ENG_20050406.0071	9	243	announced	announce	Jennings	jennings	Peter Jennings	SUBJECT	10	NO	NO
RTE6-DEV	NO	a5ef691f-80f8-44a1-878d-9dd31aa5b4d0	D0927	LTW_ENG_20050412.0022	5	243	announced	announce	April	april	April 2005	OBJECT	1	YES	NO
RTE6-DEV	NO	b57c361a-9a0a-4739-8ecf-5f349e9c8629	D0927	NYT_ENG_20050405.0089	1	243	announced	announce	Jennings	jennings	Peter Jennings	SUBJECT	1	NO	NO
RTE6-DEV	NO	d17b4a41-49da-48fd-b401-e1b9df97ebaf	D0927	APW_ENG_20050406.0006	15	249	said	say	Westin	westin	David Westin	SUBJECT	20	NO	NO
RTE6-DEV	NO	da22eb51-fd54-4818-9dc0-58c9440db8ba	D0927	APW_ENG_20050406.0006	26	249	said	say	Westin	westin	David Westin	SUBJECT	22	NO	NO
RTE6-DEV	NO	732554ab-cbc7-4901-98dd-cd116715e330	D0927	APW_ENG_20050406.0006	0	249	said	say	Westin	westin	David Westin	SUBJECT	20	NO	NO
RTE6-DEV	NO	e9a713ae-abf5-4ac7-8727-eced89c72846	D0927	APW_ENG_20050406.0006	30	249	died	die	Jennings	jennings	Peter Jennings	SUBJECT	29	NO	NO
RTE6-DEV	NO	5b8b5bc5-8574-4b2e-804b-c41d55fc6cb3	D0927	APW_ENG_20050406.0006	11	249	said	say	Westin	westin	David Westin	SUBJECT	20	NO	NO
RTE6-DEV	NO	073c47bb-c27d-484f-9fd4-a4a8fb3b05ee	D0927	APW_ENG_20050406.0006	33	249	said	say	Westin	westin	David Westin	SUBJECT	22	NO	NO
RTE6-DEV	NO	26a1f47f-6ab8-49bf-886f-362249d7e219	D0927	APW_ENG_20050406.0006	3	249	said	say	Westin	westin	David Westin	SUBJECT	20	NO	NO
RTE6-DEV	NO	0a1bb28d-d509-42a2-b624-8dffd1a493e5	D0927	APW_ENG_20050406.0006	16	249	said	say	Westin	westin	David Westin	SUBJECT	20	NO	NO
RTE6-DEV	NO	d09d4124-1aa5-489b-89cc-20885455f4e3	D0927	APW_ENG_20050406.0006	12	249	said	say	Westin	westin	David Westin	SUBJECT	20	NO	NO
RTE6-DEV	NO	0c8147dd-6ab5-48bd-8b1d-3863d274d9bf	D0927	APW_ENG_20050406.0006	14	249	said	say	Westin	westin	David Westin	SUBJECT	20	NO	NO
RTE6-DEV	NO	fc06b234-f244-4c79-b21e-740673677ae7	D0927	APW_ENG_20050406.0006	19	249	said	say	Westin	westin	David Westin	SUBJECT	20	NO	NO
RTE6-DEV	NO	0daa5e1f-f6f7-48c0-ac6e-4eb110f95ba7	D0927	LTW_ENG_20050406.0036	1	249	said	say	Westin	westin	David Westin	SUBJECT	13	NO	NO
RTE6-DEV	NO	8d73e1a7-19bb-4f18-8125-97462f99e416	D0927	LTW_ENG_20050406.0036	55	249	said	say	Westin	westin	David Westin	SUBJECT	15	NO	NO
RTE6-DEV	NO	2109a638-1d71-4394-aaea-3fbb59b8befe	D0927	LTW_ENG_20050406.0036	27	249	said	say	Westin	westin	David Westin	SUBJECT	15	NO	NO
RTE6-DEV	NO	a555d332-7836-4914-9bf1-75d8982b3567	D0927	LTW_ENG_20050406.0036	48	249	said	say	Westin	westin	David Westin	SUBJECT	15	NO	NO
RTE6-DEV	NO	08a1587f-1bdc-4f02-9215-ccdb56ad4518	D0927	LTW_ENG_20050406.0036	2	249	said	say	Westin	westin	David Westin	SUBJECT	13	NO	NO
RTE6-DEV	NO	e450ce19-8218-4f29-9e8d-1c9f5a0d2770	D0927	LTW_ENG_20050406.0036	8	249	said	say	Westin	westin	David Westin	SUBJECT	13	NO	NO
RTE6-DEV	NO	39a0dd4a-c98a-42b4-a4c7-3aaad3ed574a	D0927	LTW_ENG_20050406.0036	28	249	said	say	Westin	westin	David Westin	SUBJECT	15	NO	NO
RTE6-DEV	NO	f0bacd3a-6a4c-456d-b4b3-d0473533ae2c	D0927	LTW_ENG_20050406.0036	21	249	said	say	Westin	westin	David Westin	SUBJECT	15	NO	NO
RTE6-DEV	NO	ad690515-98ac-48c7-b6ed-e0a756636f0b	D0927	LTW_ENG_20050406.0036	50	249	said	say	Westin	westin	David Westin	SUBJECT	15	NO	NO
RTE6-DEV	NO	e00d1669-87ab-4eb1-8e01-6ce42e0ad5fe	D0927	LTW_ENG_20050406.0036	22	249	said	say	Westin	westin	David Westin	SUBJECT	15	NO	NO
RTE6-DEV	NO	2d07a80a-ba04-4d38-9fae-c8ee5958cce5	D0927	LTW_ENG_20050406.0036	19	249	said	say	Westin	westin	David Westin	SUBJECT	15	NO	NO
RTE6-DEV	NO	7249253d-a426-42f0-8d20-ba05ff6934c6	D0927	LTW_ENG_20050406.0036	20	249	said	say	Westin	westin	David Westin	SUBJECT	15	NO	NO
RTE6-DEV	NO	7f9435f4-d243-45ac-af50-90cf6192bb24	D0927	LTW_ENG_20050406.0036	24	249	said	say	Westin	westin	David Westin	SUBJECT	15	NO	NO
RTE6-DEV	NO	2b392a11-f7d7-4330-b6aa-04747e35028b	D0927	LTW_ENG_20050406.0071	25	249	said	say	Westin	westin	David Westin	SUBJECT	15	NO	NO
RTE6-DEV	NO	dcdcbfa0-0616-4a06-b4c3-8cda3e9e957a	D0927	LTW_ENG_20050412.0022	35	249	died	die	Jennings	jennings	Peter Jennings	SUBJECT	34	NO	NO
RTE6-DEV	NO	c91ccf84-92d0-421d-a388-6c335d9a0f49	D0927	NYT_ENG_20050405.0089	19	249	said	say	Westin	westin	David Westin	SUBJECT	5	NO	NO
RTE6-DEV	NO	e5a91333-96a1-4d36-b1d4-f460639e05bc	D0927	NYT_ENG_20050405.0152	5	249	said	say	Westin	westin	David Westin	SUBJECT	2	NO	NO
RTE6-DEV	NO	ec360f03-c640-492e-91b6-ef41fb39a5eb	D0927	NYT_ENG_20050405.0152	19	249	said	say	Westin	westin	David Westin	SUBJECT	20	NO	NO
RTE6-DEV	NO	a1aed308-6d67-4908-8e5a-a3ab05bcaddd	D0927	NYT_ENG_20050405.0152	24	249	said	say	Westin	westin	David Westin	SUBJECT	23	NO	NO
RTE6-DEV	NO	e0f563df-9211-4bcd-af19-9522af4ab1e8	D0927	NYT_ENG_20050405.0152	27	249	said	say	Westin	westin	David Westin	SUBJECT	23	NO	NO
RTE6-DEV	NO	1674b62f-ce65-4aea-a6a6-a0817a7b331f	D0927	NYT_ENG_20050405.0152	10	249	said	say	Westin	westin	David Westin	SUBJECT	2	NO	NO
RTE6-DEV	NO	52a46af4-7061-45e1-a61a-9600b9f9b406	D0927	NYT_ENG_20050405.0268	15	249	said	say	Westin	westin	David Westin	SUBJECT	13	NO	NO
RTE6-DEV	NO	3be5dbc4-824e-4320-ad52-9500b1c064e7	D0927	NYT_ENG_20050405.0268	2	249	said	say	Westin	westin	David Westin	SUBJECT	12	NO	NO
RTE6-DEV	NO	8ed9733a-b43b-42b7-8a62-e525e2728e79	D0927	NYT_ENG_20050405.0268	19	249	said	say	Westin	westin	David Westin	SUBJECT	13	NO	NO
RTE6-DEV	NO	dc12712f-e871-4cb3-a500-cecade59a62f	D0927	NYT_ENG_20050405.0268	6	249	said	say	Westin	westin	David Westin	SUBJECT	12	NO	NO
RTE6-DEV	NO	b3978932-dcf5-4103-8c6d-293e4effbd40	D0927	NYT_ENG_20050405.0268	16	249	said	say	Westin	westin	David Westin	SUBJECT	13	NO	NO
RTE6-DEV	NO	a7ce7036-365b-498c-9760-9e4d846dcbfd	D0927	NYT_ENG_20050417.0063	11	249	said	say	Westin	westin	David Westin	SUBJECT	10	NO	NO
RTE6-DEV	NO	cc33ffa9-9574-4c17-ba17-9e317b08e35f	D0927	NYT_ENG_20050417.0063	14	249	said	say	Westin	westin	David Westin	SUBJECT	13	NO	NO
RTE6-DEV	NO	c1d0f0b7-2af6-4244-ad41-974dd016ad7b	D0927	APW_ENG_20050406.0006	30	250	died	die	Jennings	jennings	Peter Jennings	SUBJECT	29	NO	NO
RTE6-DEV	NO	2458bb5d-377b-4b0e-80b4-33d6a831709a	D0927	LTW_ENG_20050406.0071	9	250	announced	announce	network	network	Peter Jennings ' network	SUBJECT	8	NO	NO
RTE6-DEV	NO	1675483d-9276-4f82-8b72-897400979272	D0927	LTW_ENG_20050406.0071	23	250	died	die	Jennings	jennings	Peter Jennings	SUBJECT	23	NO	NO
RTE6-DEV	NO	622f5259-7b49-4ee9-88d7-f7501bf6fe89	D0927	LTW_ENG_20050406.0071	7	250	announced	announce	network	network	Peter Jennings ' network	SUBJECT	8	NO	NO
RTE6-DEV	NO	f0272b79-ddad-4bca-93f2-b38a9c6354de	D0927	LTW_ENG_20050412.0022	5	250	announced	announce	network	network	Peter Jennings ' network	SUBJECT	5	NO	NO
RTE6-DEV	NO	233de993-718e-49d0-a2a6-8cf7c2c3c799	D0927	NYT_ENG_20050405.0089	1	250	announced	announce	network	network	Peter Jennings ' network	SUBJECT	10	YES	YES
RTE6-DEV	NO	706d1ee5-5fc0-40b4-b51d-b1ee404e9097	D0927	NYT_ENG_20050405.0089	13	250	announced	announce	network	network	Peter Jennings ' network	SUBJECT	14	NO	NO
RTE6-DEV	NO	33b34266-f0de-481a-bc98-f30ab5001b4f	D0927	NYT_ENG_20050405.0152	9	250	announced	announce	network	network	Peter Jennings ' network	SUBJECT	9	NO	NO
RTE6-DEV	NO	b63e42da-8824-433e-8462-99799cdea451	D0927	NYT_ENG_20050405.0268	1	250	announced	announce	network	network	Peter Jennings ' network	SUBJECT	3	NO	NO
RTE6-DEV	NO	95223131-c257-4ef7-8b90-fcdbe71419b3	D0927	NYT_ENG_20050417.0063	13	250	announced	announce	network	network	Peter Jennings ' network	SUBJECT	13	NO	NO
RTE6-DEV	NO	a2eed3a9-6ece-43d6-ab66-3eda4619b2e1	D0927	APW_ENG_20050406.0006	19	281	diagnosed	diagnose	Jennings	jennings	Peter Jennings	OBJECT	20	NO	NO
RTE6-DEV	NO	299dbfea-f378-4ef5-b00a-cc0e101a3f03	D0927	APW_ENG_20050406.0006	19	281	diagnosed	diagnose	cancer	cancer	lung cancer	OBJECT	19	YES	NO
RTE6-DEV	NO	adf82db2-3b84-42c2-be9c-2b00d709d190	D0927	APW_ENG_20050406.0006	13	281	diagnosed	diagnose	Jennings	jennings	Peter Jennings	OBJECT	11	YES	NO
RTE6-DEV	NO	6d79a1a7-d6ca-48e9-be0c-c9d5be8fc5de	D0927	APW_ENG_20050406.0006	13	281	diagnosed	diagnose	cancer	cancer	lung cancer	OBJECT	13	YES	YES
RTE6-DEV	NO	9ef474f1-68ca-4144-823f-7fd7cb2c638f	D0927	LTW_ENG_20050406.0036	6	281	diagnosed	diagnose	Jennings	jennings	Peter Jennings	OBJECT	8	YES	NO
RTE6-DEV	NO	97c8c034-5326-449e-8e84-498256a83210	D0927	LTW_ENG_20050406.0036	6	281	diagnosed	diagnose	cancer	cancer	lung cancer	OBJECT	6	YES	NO
RTE6-DEV	NO	5368eb2a-9ff0-4de7-8e2f-3adeb78d75a2	D0927	LTW_ENG_20050406.0071	19	281	diagnosed	diagnose	Jennings	jennings	Peter Jennings	OBJECT	19	YES	NO
RTE6-DEV	NO	d4c0f729-454e-4bb1-8e51-04edc35e4ec0	D0927	LTW_ENG_20050406.0071	19	281	diagnosed	diagnose	cancer	cancer	lung cancer	OBJECT	5	YES	NO
RTE6-DEV	NO	41baa625-8ee7-4285-8423-1fd053391e8f	D0927	NYT_ENG_20050405.0268	22	281	diagnosed	diagnose	Jennings	jennings	Peter Jennings	OBJECT	18	NO	NO
RTE6-DEV	NO	a04230a9-fd93-4e62-b55b-819f4455f0d4	D0927	NYT_ENG_20050405.0268	22	281	diagnosed	diagnose	cancer	cancer	lung cancer	OBJECT	22	YES	NO
RTE6-DEV	NO	82ccd80b-9cb6-482a-a463-3d46345273a9	D0927	NYT_ENG_20050405.0268	6	281	diagnosed	diagnose	Jennings	jennings	Peter Jennings	OBJECT	4	YES	NO
RTE6-DEV	NO	7ead35a3-56f1-4628-a1f8-b9fcd221d726	D0927	NYT_ENG_20050405.0268	6	281	diagnosed	diagnose	cancer	cancer	lung cancer	OBJECT	6	NO	NO
RTE6-DEV	NO	f17a0a22-73fa-40f4-8b93-504e90909cbb	D0927	APW_ENG_20050406.0006	1	282	began	begin	Jennings	jennings	Peter Jennings	SUBJECT	1	YES	NO
RTE6-DEV	NO	a2870a3b-7e26-4763-8973-960cc8f7b78b	D0927	APW_ENG_20050406.0006	1	282	began	begin	treatment	treatment	chemotherapy treatment	OBJECT	14	YES	YES
RTE6-DEV	NO	1792fe8c-866b-414f-9e4f-c14ed9ed2e63	D0927	LTW_ENG_20050406.0036	2	282	began	begin	treatment	treatment	chemotherapy treatment	OBJECT	22	NO	NO
RTE6-DEV	NO	17b041b3-eff6-4c32-bd4e-37aba7cc643d	D0927	LTW_ENG_20050406.0071	1	282	began	begin	Jennings	jennings	Peter Jennings	SUBJECT	1	YES	NO
RTE6-DEV	NO	22c34b07-10eb-42b7-bc2c-9ab7f446f454	D0927	LTW_ENG_20050406.0071	1	282	began	begin	treatment	treatment	chemotherapy treatment	OBJECT	3	YES	YES
RTE6-DEV	NO	747227a9-0a1f-45e8-9d9a-c58c85b9da11	D0927	LTW_ENG_20050406.0071	11	282	began	begin	Jennings	jennings	Peter Jennings	SUBJECT	10	YES	YES
RTE6-DEV	NO	0a025a0e-032c-4cae-8366-e5ebaa8904fa	D0927	LTW_ENG_20050429.0144	2	282	began	begin	Jennings	jennings	Peter Jennings	SUBJECT	1	YES	YES
RTE6-DEV	NO	91dfe0bc-0a9a-48f9-88f6-acc8acc0fde7	D0927	NYT_ENG_20050405.0152	1	282	began	begin	Jennings	jennings	Peter Jennings	SUBJECT	1	YES	YES
RTE6-DEV	NO	085c0e20-c30a-4d4d-93a6-ea019c2f4f1a	D0927	NYT_ENG_20050405.0152	1	282	began	begin	treatment	treatment	chemotherapy treatment	OBJECT	2	YES	YES
RTE6-DEV	NO	433a0ae2-70c0-4cfa-9c3a-1388c9220569	D0927	NYT_ENG_20050405.0268	1	282	began	begin	Jennings	jennings	Peter Jennings	SUBJECT	1	YES	YES
RTE6-DEV	NO	d15143ef-cc39-4060-8d2c-907fe328d944	D0927	NYT_ENG_20050417.0063	7	282	began	begin	Jennings	jennings	Peter Jennings	SUBJECT	7	YES	YES
RTE6-DEV	NO	7fd8bb0e-e585-4647-94b7-c169c633d3ca	D0929	AFP_ENG_20050920.0534	3	3	reach	reach	Rita	rita	Hurricane Rita	SUBJECT	3	YES	NO
RTE6-DEV	NO	51975375-d1c3-42cd-8ffa-8c4122a65eb1	D0929	AFP_ENG_20050920.0534	3	3	reach	reach	intensity	intensity	top intensity	OBJECT	3	YES	NO
RTE6-DEV	NO	d244ba12-b12c-401f-9442-fade05d9c89c	D0929	AFP_ENG_20050920.0561	3	3	reach	reach	Rita	rita	Hurricane Rita	SUBJECT	3	YES	NO
RTE6-DEV	NO	ce4f9670-2afc-478e-9598-64497f854d8a	D0929	AFP_ENG_20050920.0561	3	3	reach	reach	intensity	intensity	top intensity	OBJECT	3	YES	NO
RTE6-DEV	NO	4edaff2b-40fc-441a-94d3-a13c6358e52f	D0929	NYT_ENG_20050920.0246	4	11	declared	declare	Louisiana	louisiana	Louisiana	OBJECT	4	YES	NO
RTE6-DEV	NO	7b20ff13-7ec7-45de-b8bd-a23a610aba16	D0929	XIN_ENG_20050919.0201	4	11	declared	declare	Louisiana	louisiana	Louisiana	OBJECT	7	NO	NO
RTE6-DEV	NO	7a76bac3-03da-47cd-bc7c-65fe63204989	D0929	AFP_ENG_20050920.0614	11	13	threatened	threaten	Rita	rita	Rita	SUBJECT	11	YES	NO
RTE6-DEV	NO	8291e7aa-bd09-4d36-bcb0-7f918ea6958d	D0929	XIN_ENG_20050919.0201	7	13	threatened	threaten	Rita	rita	Rita	SUBJECT	7	YES	NO
RTE6-DEV	NO	23b57497-3aab-4e1f-a4aa-6eb9f95c5287	D0929	AFP_ENG_20050920.0413	2	136	turned	turn	Rita	rita	Rita	SUBJECT	2	NO	NO
RTE6-DEV	NO	4b1197b8-75bb-4a22-a540-ae3483036723	D0929	AFP_ENG_20050920.0633	3	138	declared	declare	state	state	a state of emergency in Texas	OBJECT	2	NO	NO
RTE6-DEV	NO	129fed16-970b-467c-bc00-3178f9699036	D0929	NYT_ENG_20050920.0246	4	138	declared	declare	Bush	bush	President George W. Bush	SUBJECT	4	YES	NO
RTE6-DEV	NO	304622b4-b6fb-484c-a0b1-bd144413506e	D0929	AFP_ENG_20050920.0534	3	141	warnings	warning	Hurricane	hurricane	Hurricane	SUBJECT	3	NO	NO
RTE6-DEV	NO	a9f09ff5-a62b-4516-854c-52ac0e4f0d40	D0929	AFP_ENG_20050920.0561	3	141	warnings	warning	Hurricane	hurricane	Hurricane	SUBJECT	3	NO	NO
RTE6-DEV	NO	a3193d17-0f43-45fe-8c01-f2b41ff1e7ec	D0929	AFP_ENG_20050920.0664	5	141	warnings	warning	Hurricane	hurricane	Hurricane	SUBJECT	4	NO	NO
RTE6-DEV	NO	1501223d-06ba-4331-903b-ba0e015763e5	D0929	AFP_ENG_20050920.0413	3	143	production	production	oil	oil	oil	UNKNOWN	3	YES	NO
RTE6-DEV	NO	d82db8d0-1924-4a34-9ce6-bb245afd4c4f	D0929	AFP_ENG_20050920.0413	2	143	threat	threat	Rita	rita	Hurricane Rita	SUBJECT	2	YES	YES
RTE6-DEV	NO	a37dedd9-d30b-4a15-9bce-7ad670a2d1dd	D0929	AFP_ENG_20050920.0614	11	143	threat	threat	Rita	rita	Hurricane Rita	SUBJECT	11	YES	NO
RTE6-DEV	NO	7c1d3972-0bc0-472a-8343-7c09ac9d5dc9	D0929	AFP_ENG_20050920.0630	1	143	threat	threat	Rita	rita	Hurricane Rita	SUBJECT	1	YES	NO
RTE6-DEV	NO	69aba5e7-b083-4ee8-a518-4ba02cd3248a	D0929	XIN_ENG_20050919.0201	7	143	threat	threat	Rita	rita	Hurricane Rita	SUBJECT	7	YES	NO
RTE6-DEV	NO	f3b9f441-2dae-448d-9718-79c0408b7f64	D0937	NYT_ENG_20060212.0196	39	261	suffered	suffer	Whittington	whittington	Harry M. Whittington	SUBJECT	40	NO	NO
RTE6-DEV	NO	03d2cf43-f1dd-4ddc-8988-6e244a97a735	D0937	NYT_ENG_20060213.0144	19	261	suffered	suffer	Whittington	whittington	Harry M. Whittington	SUBJECT	16	NO	NO
RTE6-DEV	NO	b6465f3e-1f2b-4a28-9f45-d43d8f91cc7c	D0937	AFP_ENG_20060213.0664	10	262	wounded	wound	Whittington	whittington	Harry M. Whittington	OBJECT	10	YES	YES
RTE6-DEV	NO	4a0ecb6c-5f91-487a-bac0-23045e40b7db	D0937	AFP_ENG_20060213.0741	6	262	wounded	wound	Whittington	whittington	Harry M. Whittington	OBJECT	6	YES	YES
RTE6-DEV	NO	1c8eb02e-aa7d-48a4-96d7-08cd07ef052a	D0937	APW_ENG_20060212.0608	1	262	wounded	wound	Whittington	whittington	Harry M. Whittington	OBJECT	2	YES	YES
RTE6-DEV	NO	d6dd03e9-aaa5-4819-96d2-45b6eb10e26e	D0937	APW_ENG_20060212.0608	1	262	wounded	wound	pellets	pellet	the shotgun pellets	SUBJECT	1	YES	NO
RTE6-DEV	NO	f2dfc7fd-2076-4121-bce9-2a91788deaca	D0937	NYT_ENG_20060213.0277	3	262	wounded	wound	Whittington	whittington	Harry M. Whittington	OBJECT	2	YES	NO
RTE6-DEV	NO	29f523c1-b55c-4606-9208-7a3df52c76d8	D0937	NYT_ENG_20060213.0277	3	262	wounded	wound	pellets	pellet	the shotgun pellets	SUBJECT	3	YES	NO
RTE6-DEV	NO	4a504303-6c71-49fc-9ee2-ca95255a0376	D0937	NYT_ENG_20060213.0277	1	262	wounded	wound	Whittington	whittington	Harry M. Whittington	OBJECT	2	YES	YES
RTE6-DEV	NO	1ace7656-aa8d-4d98-b2cb-05e6ad4daff6	D0937	NYT_ENG_20060213.0277	1	262	wounded	wound	pellets	pellet	the shotgun pellets	SUBJECT	3	YES	NO
RTE6-DEV	NO	8379a269-14fd-4430-9b59-2bfb89d98ae4	D0937	AFP_ENG_20060213.0664	10	263	wounded	wound	Whittington	whittington	Harry M. Whittington	OBJECT	10	YES	YES
RTE6-DEV	NO	4932c3ab-3477-4b74-98d8-9859f4ae9cf1	D0937	AFP_ENG_20060213.0741	6	263	wounded	wound	Whittington	whittington	Harry M. Whittington	OBJECT	6	YES	NO
RTE6-DEV	NO	0b8c3cb1-955e-46dc-87ec-977ad4fcdf7f	D0937	APW_ENG_20060212.0608	1	263	wounded	wound	Whittington	whittington	Harry M. Whittington	OBJECT	2	YES	YES
RTE6-DEV	NO	6473d0d0-50b5-4ef8-8e3b-84604708b300	D0937	APW_ENG_20060212.0608	1	263	wounded	wound	pellets	pellet	the shotgun pellets	SUBJECT	1	YES	NO
RTE6-DEV	NO	8ed6c288-d884-46fc-817c-ce0b16c62887	D0937	LTW_ENG_20060213.0135	6	263	moved	move	one	one	one of the shotgun pellets	SUBJECT	36	NO	NO
RTE6-DEV	NO	16a1c7ea-3fc4-4305-b669-4284bc25a4bb	D0937	NYT_ENG_20060213.0144	14	263	moved	move	one	one	one of the shotgun pellets	SUBJECT	6	NO	NO
RTE6-DEV	NO	20a086f4-29bd-4580-b592-0f25d19c6239	D0937	NYT_ENG_20060213.0144	13	263	wounded	wound	Whittington	whittington	Harry M. Whittington	OBJECT	13	YES	NO
RTE6-DEV	NO	99916f14-75c5-4202-8419-c433d34a26e2	D0937	NYT_ENG_20060213.0277	3	263	wounded	wound	Whittington	whittington	Harry M. Whittington	OBJECT	2	YES	NO
RTE6-DEV	NO	d5793983-0efd-46c5-a0d9-175a710c567b	D0937	NYT_ENG_20060213.0277	3	263	wounded	wound	pellets	pellet	the shotgun pellets	SUBJECT	3	YES	NO
RTE6-DEV	NO	e05e2af0-b1f0-403d-a64c-f2d1d88427a7	D0937	NYT_ENG_20060213.0277	1	263	wounded	wound	Whittington	whittington	Harry M. Whittington	OBJECT	2	YES	YES
RTE6-DEV	NO	0ca84489-c65d-42bb-a8b3-fd2713a99d1c	D0937	NYT_ENG_20060213.0277	1	263	wounded	wound	pellets	pellet	the shotgun pellets	SUBJECT	3	YES	NO
RTE6-DEV	NO	b3c4e13e-b6ca-48d8-9140-5549801c93e0	D0937	APW_ENG_20060212.0608	32	267	peppered	pepper	Whittington	whittington	Harry M. Whittington	OBJECT	30	NO	NO
RTE6-DEV	NO	6504f4f2-f21b-43e2-a5fa-d8b89af536e7	D0937	APW_ENG_20060212.0608	32	267	peppered	pepper	pellets	pellet	birdshot pellets	OBJECT	19	NO	NO
RTE6-DEV	NO	d3c06b25-3d66-426f-8b34-c85387f46b67	D0937	NYT_ENG_20060212.0196	21	267	peppered	pepper	Whittington	whittington	Harry M. Whittington	OBJECT	22	YES	YES
RTE6-DEV	NO	109b7511-d8fd-4422-ba1c-355f12c0eb6b	D0937	NYT_ENG_20060212.0196	21	267	peppered	pepper	pellets	pellet	birdshot pellets	OBJECT	3	YES	NO
RTE6-DEV	NO	8094dd91-6837-459d-ae3a-e57625c7c766	D0937	NYT_ENG_20060213.0277	54	267	peppered	pepper	Whittington	whittington	Harry M. Whittington	OBJECT	53	YES	YES
RTE6-DEV	NO	7a0fccea-75c0-4423-b459-1a513df05130	D0937	NYT_ENG_20060213.0277	54	267	peppered	pepper	pellets	pellet	birdshot pellets	OBJECT	3	YES	NO
RTE6-DEV	NO	53cb6f54-b276-4df2-bfc3-e0ad0f5cffd8	D0937	AFP_ENG_20060213.0741	2	270	shot	shoot	Whittington	whittington	Harry M. Whittington	OBJECT	5	YES	NO
RTE6-DEV	NO	96b274b3-a401-4e8e-91c9-022fd2fba623	D0937	AFP_ENG_20060213.0741	2	270	shot	shoot	Cheney	cheney	Vice President Dick Cheney	SUBJECT	2	YES	NO
RTE6-DEV	NO	68caee21-4c23-4cb5-b37a-08f9bfac2027	D0937	AFP_ENG_20060213.0741	0	270	shot	shoot	Whittington	whittington	Harry M. Whittington	OBJECT	5	YES	YES
RTE6-DEV	NO	bdec7397-056a-4643-b393-a78d4c5fbf6a	D0937	AFP_ENG_20060213.0741	0	270	shot	shoot	Cheney	cheney	Vice President Dick Cheney	SUBJECT	0	YES	YES
RTE6-DEV	NO	89aee06d-f5fe-4042-b185-56eef9396adb	D0937	APW_ENG_20060212.0608	10	270	shot	shoot	Cheney	cheney	Vice President Dick Cheney	SUBJECT	10	NO	NO
RTE6-DEV	NO	4b758f21-a776-4c21-9522-175fa0f80d9a	D0937	LTW_ENG_20060212.0053	2	270	shot	shoot	Whittington	whittington	Harry M. Whittington	OBJECT	2	YES	NO
RTE6-DEV	NO	16838e4a-a7a8-49cd-982e-46b17b4484c4	D0937	LTW_ENG_20060212.0053	2	270	shot	shoot	Cheney	cheney	Vice President Dick Cheney	SUBJECT	2	YES	NO
RTE6-DEV	NO	9e799263-258d-464e-b608-3c4018e4ea72	D0937	LTW_ENG_20060212.0053	6	270	shot	shoot	Whittington	whittington	Harry M. Whittington	OBJECT	7	NO	NO
RTE6-DEV	NO	daee191f-b62c-400e-8ca4-6a233d27a0cb	D0937	LTW_ENG_20060212.0053	6	270	shot	shoot	Cheney	cheney	Vice President Dick Cheney	SUBJECT	6	NO	NO
RTE6-DEV	NO	b85fe702-36d3-4f2d-9fda-3b7dca4866f3	D0937	LTW_ENG_20060213.0135	31	270	shot	shoot	Cheney	cheney	Vice President Dick Cheney	SUBJECT	30	NO	NO
RTE6-DEV	NO	450814a2-a664-4e86-849b-56425b17fbf9	D0937	LTW_ENG_20060213.0135	37	270	shot	shoot	Whittington	whittington	Harry M. Whittington	OBJECT	35	YES	NO
RTE6-DEV	NO	caf3011d-bf65-4d1a-b1b9-ba34bc2a3148	D0937	LTW_ENG_20060213.0135	37	270	shot	shoot	Cheney	cheney	Vice President Dick Cheney	SUBJECT	36	YES	NO
RTE6-DEV	NO	528ef7cd-ab24-44ca-8d97-c83c80919b68	D0937	LTW_ENG_20060213.0135	19	270	shot	shoot	Whittington	whittington	Harry M. Whittington	OBJECT	16	NO	NO
RTE6-DEV	NO	01ce1f0b-0eea-4fef-a85a-018d7f92c6ed	D0937	LTW_ENG_20060213.0135	19	270	shot	shoot	Cheney	cheney	Vice President Dick Cheney	SUBJECT	21	NO	NO
RTE6-DEV	NO	f83e667c-dd33-4b11-aa60-24a7765c710d	D0937	NYT_ENG_20060212.0196	14	270	shot	shoot	Cheney	cheney	Vice President Dick Cheney	SUBJECT	15	NO	NO
RTE6-DEV	NO	1092734e-b469-42f5-a83c-602fb5d3100d	D0937	NYT_ENG_20060213.0144	27	270	shot	shoot	Whittington	whittington	Harry M. Whittington	OBJECT	24	YES	NO
RTE6-DEV	NO	4202505a-6446-436b-9a05-bd1745abf577	D0937	NYT_ENG_20060213.0144	27	270	shot	shoot	Cheney	cheney	Vice President Dick Cheney	SUBJECT	27	YES	NO
RTE6-DEV	NO	b82ed5ca-d45d-4af7-9eaf-c70d5f451334	D0937	NYT_ENG_20060213.0144	4	270	shot	shoot	Whittington	whittington	Harry M. Whittington	OBJECT	10	YES	NO
RTE6-DEV	NO	34fc382e-9078-46a7-89b4-ff9438acf3a7	D0937	NYT_ENG_20060213.0144	4	270	shot	shoot	Cheney	cheney	Vice President Dick Cheney	SUBJECT	4	YES	NO
RTE6-DEV	NO	28f281fe-a64c-4e82-bafe-845d7da8757f	D0937	XIN_ENG_20060212.0242	5	270	shot	shoot	Cheney	cheney	Vice President Dick Cheney	SUBJECT	5	NO	NO
RTE6-DEV	NO	e8e17763-dbe9-4ad8-bc25-dc7d2249767d	D0937	AFP_ENG_20060213.0487	1	271	said	say	Cheney	cheney	Vice President Dick Cheney	SUBJECT	1	NO	NO
RTE6-DEV	NO	0390c689-375e-41a4-9863-2c0b14ac6121	D0937	AFP_ENG_20060213.0487	4	271	said	say	Cheney	cheney	Vice President Dick Cheney	SUBJECT	2	NO	NO
RTE6-DEV	NO	15998095-2a54-4e39-bbb0-b53c2cbd75dc	D0937	AFP_ENG_20060213.0664	20	271	said	say	Cheney	cheney	Vice President Dick Cheney	SUBJECT	21	NO	NO
RTE6-DEV	NO	e0c4e5f7-37f9-43d5-8278-f4ee95016e75	D0937	AFP_ENG_20060213.0664	16	271	said	say	Cheney	cheney	Vice President Dick Cheney	SUBJECT	12	NO	NO
RTE6-DEV	NO	476be285-420c-461a-bf2c-aa638537e4d6	D0937	AFP_ENG_20060213.0664	10	271	said	say	Cheney	cheney	Vice President Dick Cheney	SUBJECT	11	NO	NO
RTE6-DEV	NO	2e3a784b-0549-4ac4-8ad0-2eb4726cf38c	D0937	AFP_ENG_20060213.0741	1	271	said	say	Cheney	cheney	Vice President Dick Cheney	SUBJECT	1	NO	NO
RTE6-DEV	NO	0d7ed4ee-647c-415f-b769-ae6e61bfc863	D0937	AFP_ENG_20060213.0741	13	271	said	say	Cheney	cheney	Vice President Dick Cheney	SUBJECT	9	NO	NO
RTE6-DEV	NO	aa3246f6-993a-4f0d-9687-dcf2a084671e	D0937	AFP_ENG_20060213.0741	16	271	said	say	Cheney	cheney	Vice President Dick Cheney	SUBJECT	18	NO	NO
RTE6-DEV	NO	19b6f533-077e-4ff3-bb4d-38b4b7db0ea7	D0937	AFP_ENG_20060213.0741	2	271	said	say	Cheney	cheney	Vice President Dick Cheney	SUBJECT	2	NO	NO
RTE6-DEV	NO	1b3a973e-d8e4-4e0c-b3de-17e26c55a004	D0937	AFP_ENG_20060213.0741	20	271	said	say	Cheney	cheney	Vice President Dick Cheney	SUBJECT	20	NO	NO
RTE6-DEV	NO	08f2e480-0d35-4039-acbf-a5e55961437a	D0937	AFP_ENG_20060213.0741	18	271	said	say	Cheney	cheney	Vice President Dick Cheney	SUBJECT	18	NO	NO
RTE6-DEV	NO	1dedb7e3-e00f-4fca-911c-cf9e4b27db74	D0937	AFP_ENG_20060213.0741	25	271	said	say	Cheney	cheney	Vice President Dick Cheney	SUBJECT	24	NO	NO
RTE6-DEV	NO	e215d9d1-73a8-4271-9038-b1bf44779109	D0937	AFP_ENG_20060213.0741	24	271	said	say	Cheney	cheney	Vice President Dick Cheney	SUBJECT	24	NO	NO
RTE6-DEV	NO	5de5569d-7949-4c27-9640-b8f2281e0f86	D0937	APW_ENG_20060212.0608	11	271	said	say	Cheney	cheney	Vice President Dick Cheney	SUBJECT	10	NO	NO
RTE6-DEV	NO	c189200b-4eb3-4bc8-803b-a5012e507a2e	D0937	APW_ENG_20060212.0608	4	271	said	say	Cheney	cheney	Vice President Dick Cheney	SUBJECT	5	NO	NO
RTE6-DEV	NO	315f6522-b6ab-4e6a-a27d-0294523331cc	D0937	APW_ENG_20060212.0608	25	271	said	say	Cheney	cheney	Vice President Dick Cheney	SUBJECT	27	NO	NO
RTE6-DEV	NO	add42264-237b-4d91-9dac-938ae6a6e17b	D0937	APW_ENG_20060212.0608	5	271	said	say	Cheney	cheney	Vice President Dick Cheney	SUBJECT	5	NO	NO
RTE6-DEV	NO	8c07b9a8-c3b1-40e9-9aab-fe64af773f16	D0937	APW_ENG_20060212.0608	18	271	said	say	Cheney	cheney	Vice President Dick Cheney	SUBJECT	18	NO	NO
RTE6-DEV	NO	39c0095c-8cc1-41ef-8332-5339573d6c16	D0937	APW_ENG_20060212.0608	9	271	said	say	Cheney	cheney	Vice President Dick Cheney	SUBJECT	9	NO	NO
RTE6-DEV	NO	24f86841-7d6d-4422-a979-976dd1ba93c6	D0937	LTW_ENG_20060213.0135	5	271	said	say	Cheney	cheney	Vice President Dick Cheney	SUBJECT	4	NO	NO
RTE6-DEV	NO	7505e497-4be4-4129-b991-ad485f98bbe4	D0937	LTW_ENG_20060213.0135	16	271	said	say	Cheney	cheney	Vice President Dick Cheney	SUBJECT	13	NO	NO
RTE6-DEV	NO	f37857d2-169a-48a2-a444-8c51fadb990f	D0937	LTW_ENG_20060213.0135	1	271	said	say	Cheney	cheney	Vice President Dick Cheney	SUBJECT	1	NO	NO
RTE6-DEV	NO	7ff31af9-8bd6-49ec-a2ab-510269ac92cc	D0937	LTW_ENG_20060213.0135	11	271	said	say	Cheney	cheney	Vice President Dick Cheney	SUBJECT	9	NO	NO
RTE6-DEV	NO	bba5962a-7ee2-4fca-928c-51aa90c4b157	D0937	LTW_ENG_20060213.0135	37	271	said	say	Cheney	cheney	Vice President Dick Cheney	SUBJECT	36	NO	NO
RTE6-DEV	NO	71522e21-95b1-4f0b-a53f-2df5b0869460	D0937	LTW_ENG_20060213.0135	43	271	said	say	Cheney	cheney	Vice President Dick Cheney	SUBJECT	38	NO	NO
RTE6-DEV	NO	bdb4c0da-1985-42be-9ea2-5588a2a1c5ee	D0937	LTW_ENG_20060213.0135	23	271	said	say	Cheney	cheney	Vice President Dick Cheney	SUBJECT	21	NO	NO
RTE6-DEV	NO	df42431a-1d67-4965-8949-4ba71ad68a4d	D0937	NYT_ENG_20060212.0196	26	271	said	say	Cheney	cheney	Vice President Dick Cheney	SUBJECT	25	NO	NO
RTE6-DEV	NO	ba2ee5fc-9ea2-45de-9c1f-3207b68c9c87	D0937	NYT_ENG_20060212.0196	22	271	said	say	Cheney	cheney	Vice President Dick Cheney	SUBJECT	23	NO	NO
RTE6-DEV	NO	d3689c47-4f05-44d7-9e54-09279a7d9c6e	D0937	NYT_ENG_20060212.0196	16	271	said	say	Cheney	cheney	Vice President Dick Cheney	SUBJECT	16	NO	NO
RTE6-DEV	NO	0b8bb373-2823-4d4d-b4f0-c4a66b78a83c	D0937	NYT_ENG_20060212.0196	14	271	said	say	Cheney	cheney	Vice President Dick Cheney	SUBJECT	15	NO	NO
RTE6-DEV	NO	ba12f721-92d2-4432-a770-d961e6a21aaf	D0937	NYT_ENG_20060212.0196	42	271	said	say	Cheney	cheney	Vice President Dick Cheney	SUBJECT	42	NO	NO
RTE6-DEV	NO	e42d2fde-f34f-4654-8358-962a5d66e65a	D0937	NYT_ENG_20060212.0196	46	271	said	say	Cheney	cheney	Vice President Dick Cheney	SUBJECT	45	NO	NO
RTE6-DEV	NO	7dfcf675-7712-4296-8836-c8cc5d7b39f0	D0937	NYT_ENG_20060213.0144	12	271	said	say	Cheney	cheney	Vice President Dick Cheney	SUBJECT	12	NO	NO
RTE6-DEV	NO	8a3cb923-51fc-4e9d-86c8-4fb6fd5409ff	D0937	NYT_ENG_20060213.0144	32	271	said	say	Cheney	cheney	Vice President Dick Cheney	SUBJECT	31	NO	NO
RTE6-DEV	NO	6f4f166a-aba2-4608-8da4-91ce7ecd59ae	D0937	NYT_ENG_20060213.0144	4	271	said	say	Cheney	cheney	Vice President Dick Cheney	SUBJECT	4	NO	NO
RTE6-DEV	NO	0366f2dd-9652-4036-8826-89250bb5baa2	D0937	NYT_ENG_20060213.0277	5	271	said	say	Cheney	cheney	Vice President Dick Cheney	SUBJECT	5	NO	NO
RTE6-DEV	NO	f540c3cd-322c-43db-af51-43b94f424f12	D0937	NYT_ENG_20060213.0277	4	271	said	say	Cheney	cheney	Vice President Dick Cheney	SUBJECT	3	NO	NO
RTE6-DEV	NO	d4333ff6-f8a6-4a7a-9715-f94016e2c92e	D0937	NYT_ENG_20060213.0277	22	271	said	say	Cheney	cheney	Vice President Dick Cheney	SUBJECT	23	NO	NO
RTE6-DEV	NO	71e32906-f29f-45e8-81ed-69e047bf8e67	D0937	XIN_ENG_20060212.0242	2	271	said	say	Cheney	cheney	Vice President Dick Cheney	SUBJECT	2	NO	NO
RTE6-DEV	NO	2ec2eaf6-86fb-4a12-91a7-cb84e9cf4306	D0937	XIN_ENG_20060212.0242	4	271	said	say	Cheney	cheney	Vice President Dick Cheney	SUBJECT	4	NO	NO
RTE6-DEV	NO	625101f0-a3da-45af-be8d-0b33daffe275	D0937	XIN_ENG_20060212.0242	5	271	said	say	Cheney	cheney	Vice President Dick Cheney	SUBJECT	5	NO	NO
RTE6-DEV	NO	23f2bb4e-b380-4f7d-b650-7934d9b3a1ff	D0937	XIN_ENG_20060212.0242	7	271	said	say	Cheney	cheney	Vice President Dick Cheney	SUBJECT	6	NO	NO
RTE6-DEV	NO	5000776b-dad4-4ac0-9ee5-7e925b061925	D0937	AFP_ENG_20060213.0487	1	272	said	say	Cheney	cheney	Vice President Dick Cheney	SUBJECT	1	NO	NO
RTE6-DEV	NO	3285c7b7-aefe-4553-959a-c11664e3e09a	D0937	AFP_ENG_20060213.0487	4	272	said	say	Cheney	cheney	Vice President Dick Cheney	SUBJECT	2	NO	NO
RTE6-DEV	NO	90a46f8e-02b1-4749-9f8d-da2528e6bbe8	D0937	AFP_ENG_20060213.0664	20	272	said	say	Cheney	cheney	Vice President Dick Cheney	SUBJECT	21	NO	NO
RTE6-DEV	NO	8a9eedd4-b6b6-4e2e-b556-062b7bc88959	D0937	AFP_ENG_20060213.0664	16	272	said	say	Cheney	cheney	Vice President Dick Cheney	SUBJECT	12	NO	NO
RTE6-DEV	NO	5b987329-1338-4b4f-a2af-154097b4e86b	D0937	AFP_ENG_20060213.0664	10	272	said	say	Cheney	cheney	Vice President Dick Cheney	SUBJECT	11	NO	NO
RTE6-DEV	NO	e7616a38-c9df-4b2b-94a4-d24f4f3ed6de	D0937	AFP_ENG_20060213.0741	1	272	said	say	Cheney	cheney	Vice President Dick Cheney	SUBJECT	1	NO	NO
RTE6-DEV	NO	4863471f-2414-43f7-9dfd-6b8293dcfc16	D0937	AFP_ENG_20060213.0741	13	272	said	say	Cheney	cheney	Vice President Dick Cheney	SUBJECT	9	NO	NO
RTE6-DEV	NO	fddfd721-7f94-4854-9f1c-80421feae6c8	D0937	AFP_ENG_20060213.0741	16	272	said	say	Cheney	cheney	Vice President Dick Cheney	SUBJECT	18	NO	NO
RTE6-DEV	NO	8fa1bf39-11d7-4a49-8e6d-66001a7f2ff0	D0937	AFP_ENG_20060213.0741	2	272	said	say	Cheney	cheney	Vice President Dick Cheney	SUBJECT	2	NO	NO
RTE6-DEV	NO	e3f0bf19-76d7-476d-bc07-24d6bb8d24f5	D0937	AFP_ENG_20060213.0741	20	272	said	say	Cheney	cheney	Vice President Dick Cheney	SUBJECT	20	NO	NO
RTE6-DEV	NO	d6ef3e75-37ee-43ea-8141-04e676353841	D0937	AFP_ENG_20060213.0741	18	272	said	say	Cheney	cheney	Vice President Dick Cheney	SUBJECT	18	NO	NO
RTE6-DEV	NO	2a40e340-2361-43e2-8dc3-64aa242e2cb6	D0937	AFP_ENG_20060213.0741	25	272	said	say	Cheney	cheney	Vice President Dick Cheney	SUBJECT	24	NO	NO
RTE6-DEV	NO	6789a4c9-10b3-47af-acc2-69abe7738034	D0937	AFP_ENG_20060213.0741	24	272	said	say	Cheney	cheney	Vice President Dick Cheney	SUBJECT	24	NO	NO
RTE6-DEV	NO	bc539a2b-5f18-4be6-89f7-498e078f2800	D0937	APW_ENG_20060212.0608	11	272	said	say	Cheney	cheney	Vice President Dick Cheney	SUBJECT	10	NO	NO
RTE6-DEV	NO	a0c28da0-210e-42f6-a181-a9351a22c6e2	D0937	APW_ENG_20060212.0608	4	272	said	say	Cheney	cheney	Vice President Dick Cheney	SUBJECT	5	NO	NO
RTE6-DEV	NO	3b018f05-cf3d-41ce-bb49-5e16a2e43000	D0937	APW_ENG_20060212.0608	25	272	said	say	Cheney	cheney	Vice President Dick Cheney	SUBJECT	27	NO	NO
RTE6-DEV	NO	7e0e2679-2000-4226-a796-f829bea168ae	D0937	APW_ENG_20060212.0608	5	272	said	say	Cheney	cheney	Vice President Dick Cheney	SUBJECT	5	NO	NO
RTE6-DEV	NO	be84f99a-8217-4ea5-ad50-e8b86ed107ee	D0937	APW_ENG_20060212.0608	18	272	said	say	Cheney	cheney	Vice President Dick Cheney	SUBJECT	18	NO	NO
RTE6-DEV	NO	f1a4c245-3968-4a91-a0d8-47bdd0380f13	D0937	APW_ENG_20060212.0608	9	272	said	say	Cheney	cheney	Vice President Dick Cheney	SUBJECT	9	NO	NO
RTE6-DEV	NO	cf536c61-8f85-46a2-9444-0b74ce326774	D0937	LTW_ENG_20060213.0135	5	272	said	say	Cheney	cheney	Vice President Dick Cheney	SUBJECT	4	NO	NO
RTE6-DEV	NO	cce85ffc-884a-45b4-b3a1-07a3eb5fc130	D0937	LTW_ENG_20060213.0135	16	272	said	say	Cheney	cheney	Vice President Dick Cheney	SUBJECT	13	NO	NO
RTE6-DEV	NO	d9116a1f-00ca-47f9-80d4-2b611a4fa9de	D0937	LTW_ENG_20060213.0135	1	272	said	say	Cheney	cheney	Vice President Dick Cheney	SUBJECT	1	NO	NO
RTE6-DEV	NO	4207c679-079f-486d-b070-3db7ad5079f3	D0937	LTW_ENG_20060213.0135	11	272	said	say	Cheney	cheney	Vice President Dick Cheney	SUBJECT	9	NO	NO
RTE6-DEV	NO	0e80c208-72aa-4212-bd8b-e2a510311df2	D0937	LTW_ENG_20060213.0135	37	272	said	say	Cheney	cheney	Vice President Dick Cheney	SUBJECT	36	NO	NO
RTE6-DEV	NO	ae93666a-50e0-46ab-b599-15aac73cdacc	D0937	LTW_ENG_20060213.0135	43	272	said	say	Cheney	cheney	Vice President Dick Cheney	SUBJECT	38	NO	NO
RTE6-DEV	NO	feacb6d2-c32e-49f2-850f-4181ab305bee	D0937	LTW_ENG_20060213.0135	23	272	said	say	Cheney	cheney	Vice President Dick Cheney	SUBJECT	21	NO	NO
RTE6-DEV	NO	fdc66552-c601-4134-ac3b-c2f4d847100c	D0937	NYT_ENG_20060212.0196	26	272	said	say	Cheney	cheney	Vice President Dick Cheney	SUBJECT	25	NO	NO
RTE6-DEV	NO	bbfdfc0a-3a26-44b2-b4b6-68c5744c3885	D0937	NYT_ENG_20060212.0196	22	272	said	say	Cheney	cheney	Vice President Dick Cheney	SUBJECT	23	NO	NO
RTE6-DEV	NO	a61c5af1-9a51-454f-bca9-ac28c4e45890	D0937	NYT_ENG_20060212.0196	16	272	said	say	Cheney	cheney	Vice President Dick Cheney	SUBJECT	16	NO	NO
RTE6-DEV	NO	df1c512d-6247-4ccd-975a-7c7304d3bea1	D0937	NYT_ENG_20060212.0196	14	272	said	say	Cheney	cheney	Vice President Dick Cheney	SUBJECT	15	NO	NO
RTE6-DEV	NO	ff623b17-42a2-402b-b14b-ffa5d985222a	D0937	NYT_ENG_20060212.0196	42	272	said	say	Cheney	cheney	Vice President Dick Cheney	SUBJECT	42	NO	NO
RTE6-DEV	NO	6b3feb90-72d2-489c-bba5-ee9874f1095f	D0937	NYT_ENG_20060212.0196	46	272	said	say	Cheney	cheney	Vice President Dick Cheney	SUBJECT	45	NO	NO
RTE6-DEV	NO	19a1c29b-f6e6-41e8-80ac-f401245ecca2	D0937	NYT_ENG_20060213.0144	12	272	said	say	Cheney	cheney	Vice President Dick Cheney	SUBJECT	12	NO	NO
RTE6-DEV	NO	3dcdc410-9dde-469a-8f28-596d222d8ca6	D0937	NYT_ENG_20060213.0144	32	272	said	say	Cheney	cheney	Vice President Dick Cheney	SUBJECT	31	NO	NO
RTE6-DEV	NO	1c8d51f4-e493-4d1b-9e4f-7da7e537b1bc	D0937	NYT_ENG_20060213.0144	4	272	said	say	Cheney	cheney	Vice President Dick Cheney	SUBJECT	4	NO	NO
RTE6-DEV	NO	b0b77d94-1d6f-4033-93c0-2bd01a6fb8fd	D0937	NYT_ENG_20060213.0277	5	272	said	say	Cheney	cheney	Vice President Dick Cheney	SUBJECT	5	NO	NO
RTE6-DEV	NO	739ab86b-596c-4605-b84c-7ed7b734da34	D0937	NYT_ENG_20060213.0277	4	272	said	say	Cheney	cheney	Vice President Dick Cheney	SUBJECT	3	NO	NO
RTE6-DEV	NO	b265a4f8-fa5e-4129-9708-07d898b370a4	D0937	NYT_ENG_20060213.0277	22	272	said	say	Cheney	cheney	Vice President Dick Cheney	SUBJECT	23	NO	NO
RTE6-DEV	NO	e4e0a317-65c9-472e-8e98-9e06b144454c	D0937	XIN_ENG_20060212.0242	2	272	said	say	Cheney	cheney	Vice President Dick Cheney	SUBJECT	2	NO	NO
RTE6-DEV	NO	e537d041-0d36-4cf8-b7bc-ff9465d298da	D0937	XIN_ENG_20060212.0242	4	272	said	say	Cheney	cheney	Vice President Dick Cheney	SUBJECT	4	NO	NO
RTE6-DEV	NO	a4b23258-3f68-4285-b20f-97ec73f1b660	D0937	XIN_ENG_20060212.0242	5	272	said	say	Cheney	cheney	Vice President Dick Cheney	SUBJECT	5	NO	NO
RTE6-DEV	NO	31b1c76e-3ea5-4944-b550-b0c02461571c	D0937	XIN_ENG_20060212.0242	7	272	said	say	Cheney	cheney	Vice President Dick Cheney	SUBJECT	6	NO	NO
RTE6-DEV	NO	bc7b8bc8-12c6-4f5a-9a8d-39db535d337c	D0937	AFP_ENG_20060213.0487	1	273	shooting	shooting	Whittington	whittington	Harry M. Whittington	UNKNOWN	2	YES	YES
RTE6-DEV	NO	b18dd6be-bd84-44d8-b45a-cc0a046fa136	D0937	AFP_ENG_20060213.0487	2	273	shooting	shooting	Whittington	whittington	Harry M. Whittington	UNKNOWN	2	NO	NO
RTE6-DEV	NO	0610915b-2fd2-4bf8-8659-19ad27f3a2ec	D0937	AFP_ENG_20060213.0664	1	273	shooting	shooting	Whittington	whittington	Harry M. Whittington	UNKNOWN	2	YES	YES
RTE6-DEV	NO	e9582368-0af8-42cf-a455-1100e3619816	D0937	AFP_ENG_20060213.0664	20	273	shooting	shooting	Cheney	cheney	Vice President Dick Cheney 's	UNKNOWN	21	YES	YES
RTE6-DEV	NO	4ecddeb7-bf72-48b1-85a8-28bebd482537	D0937	AFP_ENG_20060213.0664	20	273	shooting	shooting	Whittington	whittington	Harry M. Whittington	UNKNOWN	20	YES	YES
RTE6-DEV	NO	d5269720-3452-4306-83c1-02f5e909ab06	D0937	AFP_ENG_20060213.0664	0	273	shooting	shooting	Whittington	whittington	Harry M. Whittington	UNKNOWN	2	YES	NO
RTE6-DEV	NO	bdfea717-1ff5-4259-991c-3d96e14f6469	D0937	AFP_ENG_20060213.0741	1	273	shooting	shooting	Cheney	cheney	Vice President Dick Cheney 's	UNKNOWN	1	YES	YES
RTE6-DEV	NO	d4bc12a0-6d70-43c1-b553-9210ebb83b32	D0937	AFP_ENG_20060213.0741	1	273	shooting	shooting	Whittington	whittington	Harry M. Whittington	UNKNOWN	5	YES	YES
RTE6-DEV	NO	a143b9fa-a244-434a-b1f0-ba1ee6bf2850	D0937	AFP_ENG_20060213.0741	2	273	shooting	shooting	Cheney	cheney	Vice President Dick Cheney 's	UNKNOWN	2	YES	NO
RTE6-DEV	NO	f5f48094-5fb9-497d-9c40-6d53d9fb3e40	D0937	AFP_ENG_20060213.0741	2	273	shooting	shooting	Whittington	whittington	Harry M. Whittington	UNKNOWN	5	YES	NO
RTE6-DEV	NO	6c16c3b1-3aa3-4015-8e73-ba553184bce6	D0937	AFP_ENG_20060213.0741	16	273	shooting	shooting	Cheney	cheney	Vice President Dick Cheney 's	UNKNOWN	18	YES	YES
RTE6-DEV	NO	fa66cff1-ad13-4603-a3eb-4dccdc6924c8	D0937	AFP_ENG_20060213.0741	16	273	shooting	shooting	Whittington	whittington	Harry M. Whittington	UNKNOWN	18	YES	YES
RTE6-DEV	NO	a26d254d-8aea-4f41-a345-b21e5a2bf221	D0937	APW_ENG_20060212.0608	0	273	shooting	shooting	Whittington	whittington	Harry M. Whittington	UNKNOWN	2	YES	YES
RTE6-DEV	NO	46392c0c-67f0-4201-a3f6-21ed730f34c4	D0937	APW_ENG_20060212.0608	1	273	shooting	shooting	Whittington	whittington	Harry M. Whittington	UNKNOWN	2	YES	YES
RTE6-DEV	NO	7d168291-ea74-4769-beef-678330d776c4	D0937	APW_ENG_20060212.0608	2	273	shooting	shooting	Whittington	whittington	Harry M. Whittington	UNKNOWN	2	YES	YES
RTE6-DEV	NO	947eb4bf-7afc-4cf8-81ab-bc18aa137d03	D0937	APW_ENG_20060212.0608	10	273	shooting	shooting	Cheney	cheney	Vice President Dick Cheney 's	UNKNOWN	10	NO	NO
RTE6-DEV	NO	d182bcda-16ef-46bc-b49a-4b5e0eb2a313	D0937	APW_ENG_20060212.0608	7	273	shooting	shooting	Cheney	cheney	Vice President Dick Cheney 's	UNKNOWN	6	YES	NO
RTE6-DEV	NO	bea8edae-0850-4c91-aad3-9cd65eb0b263	D0937	APW_ENG_20060212.0608	7	273	shooting	shooting	Whittington	whittington	Harry M. Whittington	UNKNOWN	6	YES	NO
RTE6-DEV	NO	6680a3e0-9e19-4aa0-a4ef-e6a99b03c298	D0937	LTW_ENG_20060212.0053	2	273	shooting	shooting	Cheney	cheney	Vice President Dick Cheney 's	UNKNOWN	2	YES	NO
RTE6-DEV	NO	b5736ba3-fa52-46c1-96b5-abce20d77611	D0937	LTW_ENG_20060212.0053	2	273	shooting	shooting	Whittington	whittington	Harry M. Whittington	UNKNOWN	2	YES	NO
RTE6-DEV	NO	989fe6cf-2d59-44c3-832c-b2591f32dc10	D0937	LTW_ENG_20060212.0053	3	273	shooting	shooting	Whittington	whittington	Harry M. Whittington	UNKNOWN	3	NO	NO
RTE6-DEV	NO	5f27d231-6b8f-4421-be08-256946dc5071	D0937	LTW_ENG_20060213.0135	5	273	shooting	shooting	Cheney	cheney	Vice President Dick Cheney 's	UNKNOWN	4	NO	NO
RTE6-DEV	NO	e0dec147-7ef8-406e-8ce8-3e49d98342cd	D0937	LTW_ENG_20060213.0135	5	273	shooting	shooting	Whittington	whittington	Harry M. Whittington	UNKNOWN	5	NO	NO
RTE6-DEV	NO	39fe15b5-34d4-4b3f-894d-df17800eb18a	D0937	LTW_ENG_20060213.0135	1	273	shooting	shooting	Cheney	cheney	Vice President Dick Cheney 's	UNKNOWN	1	YES	YES
RTE6-DEV	NO	9bfa1574-83cc-41e2-a5d9-a839099ac504	D0937	LTW_ENG_20060213.0135	1	273	shooting	shooting	Whittington	whittington	Harry M. Whittington	UNKNOWN	5	YES	YES
RTE6-DEV	NO	aa107367-1799-42a6-add3-64529ab9ac11	D0937	LTW_ENG_20060213.0135	31	273	shooting	shooting	Cheney	cheney	Vice President Dick Cheney 's	UNKNOWN	30	NO	NO
RTE6-DEV	NO	e7dd0967-5305-4b4b-9a9f-0bd868285270	D0937	LTW_ENG_20060213.0135	37	273	shooting	shooting	Cheney	cheney	Vice President Dick Cheney 's	UNKNOWN	36	YES	NO
RTE6-DEV	NO	dc94c21d-6c05-4a12-9488-daea2d4ef17e	D0937	LTW_ENG_20060213.0135	37	273	shooting	shooting	Whittington	whittington	Harry M. Whittington	UNKNOWN	35	YES	NO
RTE6-DEV	NO	d207842f-0418-4185-b2ab-41951cb12d65	D0937	LTW_ENG_20060213.0135	36	273	shooting	shooting	Cheney	cheney	Vice President Dick Cheney 's	UNKNOWN	36	YES	NO
RTE6-DEV	NO	4c967ae8-5ad3-4b9c-8f33-3698bfca65ae	D0937	LTW_ENG_20060213.0135	36	273	shooting	shooting	Whittington	whittington	Harry M. Whittington	UNKNOWN	35	YES	NO
RTE6-DEV	NO	61925f31-edcd-4270-965b-18680120e60b	D0937	NYT_ENG_20060212.0196	1	273	shooting	shooting	Whittington	whittington	Harry M. Whittington	UNKNOWN	3	YES	YES
RTE6-DEV	NO	a138fa79-be26-4884-822b-13a5a746b997	D0937	NYT_ENG_20060212.0196	23	273	shooting	shooting	Cheney	cheney	Vice President Dick Cheney 's	UNKNOWN	23	YES	NO
RTE6-DEV	NO	9dcdb463-118b-4a84-9ab4-c491eb5ce11a	D0937	NYT_ENG_20060212.0196	25	273	shooting	shooting	Cheney	cheney	Vice President Dick Cheney 's	UNKNOWN	25	YES	NO
RTE6-DEV	NO	7c36cf33-f140-4e13-a0bd-bf2be21c1842	D0937	NYT_ENG_20060212.0196	6	273	shooting	shooting	Cheney	cheney	Vice President Dick Cheney 's	UNKNOWN	6	YES	YES
RTE6-DEV	NO	a5afc408-c6a1-45e2-aca4-96dd294514ec	D0937	NYT_ENG_20060212.0196	6	273	shooting	shooting	Whittington	whittington	Harry M. Whittington	UNKNOWN	5	YES	NO
RTE6-DEV	NO	fd9291b0-ef0a-4622-b706-822c45ec0744	D0937	NYT_ENG_20060213.0144	1	273	shooting	shooting	Cheney	cheney	Vice President Dick Cheney 's	UNKNOWN	1	YES	YES
RTE6-DEV	NO	22a32ce8-a9f9-42f1-b0bb-e99d584c251b	D0937	NYT_ENG_20060213.0144	1	273	shooting	shooting	Whittington	whittington	Harry M. Whittington	UNKNOWN	10	YES	YES
RTE6-DEV	NO	a89e1f85-af52-443a-8d71-7f1b36e9f571	D0937	NYT_ENG_20060213.0144	26	273	shooting	shooting	Cheney	cheney	Vice President Dick Cheney 's	UNKNOWN	26	YES	NO
RTE6-DEV	NO	d12a2075-b20f-4e7a-b722-9076228aaa38	D0937	NYT_ENG_20060213.0144	26	273	shooting	shooting	Whittington	whittington	Harry M. Whittington	UNKNOWN	24	YES	NO
RTE6-DEV	NO	649bdb0c-11a7-47a8-952b-0476c3e7f368	D0937	NYT_ENG_20060213.0144	27	273	shooting	shooting	Cheney	cheney	Vice President Dick Cheney 's	UNKNOWN	27	YES	NO
RTE6-DEV	NO	72fbf2cc-e79c-434b-9624-107be50acf0a	D0937	NYT_ENG_20060213.0144	27	273	shooting	shooting	Whittington	whittington	Harry M. Whittington	UNKNOWN	24	YES	NO
RTE6-DEV	NO	d2686e17-7d16-4846-9e99-11cafb99dd4d	D0937	NYT_ENG_20060213.0144	5	273	shooting	shooting	Cheney	cheney	Vice President Dick Cheney 's	UNKNOWN	5	YES	NO
RTE6-DEV	NO	7b3c6aae-132d-4e9b-a52b-67aab5c810ba	D0937	NYT_ENG_20060213.0144	5	273	shooting	shooting	Whittington	whittington	Harry M. Whittington	UNKNOWN	10	YES	NO
RTE6-DEV	NO	072f5f4d-c0e7-49dc-95bd-b90783a80b51	D0937	NYT_ENG_20060213.0277	1	273	shooting	shooting	Cheney	cheney	Vice President Dick Cheney 's	UNKNOWN	1	YES	NO
RTE6-DEV	NO	94b0d688-33fb-4467-865a-cc92220362e5	D0937	NYT_ENG_20060213.0277	1	273	shooting	shooting	Whittington	whittington	Harry M. Whittington	UNKNOWN	2	YES	NO
RTE6-DEV	NO	230c36f6-865a-46a1-ac29-512c84166ce2	D0937	NYT_ENG_20060213.0277	23	273	shooting	shooting	Cheney	cheney	Vice President Dick Cheney 's	UNKNOWN	23	YES	NO
RTE6-DEV	NO	58a203b9-7791-414c-acb0-ce0c745eb335	D0937	NYT_ENG_20060213.0277	23	273	shooting	shooting	Whittington	whittington	Harry M. Whittington	UNKNOWN	26	YES	NO
RTE6-DEV	NO	ff092512-a9fa-4880-9572-38b7e8be31ba	D0937	NYT_ENG_20060213.0277	13	273	shooting	shooting	Cheney	cheney	Vice President Dick Cheney 's	UNKNOWN	13	YES	NO
RTE6-DEV	NO	2030876c-9933-4ddd-9cf0-5add1c152a72	D0937	NYT_ENG_20060213.0277	13	273	shooting	shooting	Whittington	whittington	Harry M. Whittington	UNKNOWN	2	YES	NO
RTE6-DEV	NO	439675a2-3e1f-4c5a-ba9b-19403bedec56	D0937	NYT_ENG_20060213.0277	36	273	shooting	shooting	Cheney	cheney	Vice President Dick Cheney 's	UNKNOWN	36	YES	NO
RTE6-DEV	NO	c9dbff83-3b6a-4567-b806-64fb032f5fce	D0937	NYT_ENG_20060213.0277	36	273	shooting	shooting	Whittington	whittington	Harry M. Whittington	UNKNOWN	26	YES	NO
RTE6-DEV	NO	eb3c0c9c-6ec7-42dd-bdfc-6dd05ab76b94	D0937	NYT_ENG_20060213.0277	0	273	shooting	shooting	Cheney	cheney	Vice President Dick Cheney 's	UNKNOWN	1	YES	NO
RTE6-DEV	NO	2afc7c37-ead5-4652-890d-e3461dea581e	D0937	NYT_ENG_20060213.0277	0	273	shooting	shooting	Whittington	whittington	Harry M. Whittington	UNKNOWN	2	YES	NO
RTE6-DEV	NO	faf68253-5f30-4727-b16e-ce59b5fad06a	D0937	XIN_ENG_20060212.0242	1	273	shooting	shooting	Whittington	whittington	Harry M. Whittington	UNKNOWN	2	YES	YES
RTE6-DEV	NO	640a9e3c-b3ac-4cb4-806f-c60c49ec3a82	D0937	XIN_ENG_20060212.0242	5	273	shooting	shooting	Cheney	cheney	Vice President Dick Cheney 's	UNKNOWN	5	NO	NO
RTE6-DEV	NO	5a32726c-6174-45a0-99d4-f25eddf523cf	D0937	AFP_ENG_20060213.0487	1	277	shooting	shoot	Whittington	whittington	his hunting partner Harry M. Whittington	OBJECT	2	YES	YES
RTE6-DEV	NO	f1e8d70a-e212-4188-93d3-abef7985482a	D0937	AFP_ENG_20060213.0487	2	277	shooting	shoot	Whittington	whittington	his hunting partner Harry M. Whittington	OBJECT	2	NO	NO
RTE6-DEV	NO	85e4509e-8d01-4a4e-8f79-49ff77981c21	D0937	AFP_ENG_20060213.0664	1	277	shooting	shoot	Whittington	whittington	his hunting partner Harry M. Whittington	OBJECT	2	YES	YES
RTE6-DEV	NO	71b7983d-1101-4a48-9225-f04b8afbc94b	D0937	AFP_ENG_20060213.0664	20	277	shooting	shoot	Whittington	whittington	his hunting partner Harry M. Whittington	OBJECT	20	YES	YES
RTE6-DEV	NO	a635536d-5e42-4022-9153-9a356c4c35b9	D0937	AFP_ENG_20060213.0664	0	277	shooting	shoot	Whittington	whittington	his hunting partner Harry M. Whittington	OBJECT	2	YES	NO
RTE6-DEV	NO	3bc5771d-e90b-41e9-9ab5-5f60b8e0ffc2	D0937	AFP_ENG_20060213.0741	1	277	shooting	shoot	Whittington	whittington	his hunting partner Harry M. Whittington	OBJECT	5	YES	YES
RTE6-DEV	NO	34199a6c-7ad2-48ab-aeb2-a50b472065a3	D0937	AFP_ENG_20060213.0741	2	277	shooting	shoot	Whittington	whittington	his hunting partner Harry M. Whittington	OBJECT	5	YES	NO
RTE6-DEV	NO	b6b12289-ee36-4384-95b3-8cd6dbcce8c4	D0937	AFP_ENG_20060213.0741	16	277	shooting	shoot	Whittington	whittington	his hunting partner Harry M. Whittington	OBJECT	18	YES	YES
RTE6-DEV	NO	1b780666-962f-4d8f-a7df-54b6d8483881	D0937	AFP_ENG_20060213.0741	20	277	shooting	shoot	Whittington	whittington	his hunting partner Harry M. Whittington	OBJECT	20	YES	YES
RTE6-DEV	NO	41a1e564-5310-45dc-bbb0-c72ef391ddf0	D0937	APW_ENG_20060212.0608	0	277	shooting	shoot	Whittington	whittington	his hunting partner Harry M. Whittington	OBJECT	2	YES	YES
RTE6-DEV	NO	83b8902e-356b-4ac4-b304-93a7a6d3f7ef	D0937	APW_ENG_20060212.0608	1	277	shooting	shoot	Whittington	whittington	his hunting partner Harry M. Whittington	OBJECT	2	YES	YES
RTE6-DEV	NO	d1cec7d6-b6d8-49bd-a4fa-f582b802c860	D0937	APW_ENG_20060212.0608	2	277	shooting	shoot	Whittington	whittington	his hunting partner Harry M. Whittington	OBJECT	2	YES	YES
RTE6-DEV	NO	0a30747d-4d34-4341-bf68-9c14bdd2fcb1	D0937	LTW_ENG_20060212.0053	2	277	shooting	shoot	Whittington	whittington	his hunting partner Harry M. Whittington	OBJECT	2	YES	NO
RTE6-DEV	NO	9c9fdf27-a587-431b-acaa-b72e08aed372	D0937	LTW_ENG_20060213.0135	5	277	shooting	shoot	Whittington	whittington	his hunting partner Harry M. Whittington	OBJECT	5	NO	NO
RTE6-DEV	NO	6de19167-ff1f-4f4d-b51e-b3fb9775e2c3	D0937	LTW_ENG_20060213.0135	1	277	shooting	shoot	Whittington	whittington	his hunting partner Harry M. Whittington	OBJECT	5	YES	YES
RTE6-DEV	NO	f08a2b60-f269-4da9-befd-0694efb5d311	D0937	LTW_ENG_20060213.0135	37	277	shooting	shoot	Whittington	whittington	his hunting partner Harry M. Whittington	OBJECT	35	YES	NO
RTE6-DEV	NO	24c0aa99-a022-450e-88e4-2561defcaa03	D0937	LTW_ENG_20060213.0135	17	277	shooting	shoot	Whittington	whittington	his hunting partner Harry M. Whittington	OBJECT	16	NO	NO
RTE6-DEV	NO	b0e23fc9-b2b2-4cf6-a7c3-8a5753b3f179	D0937	LTW_ENG_20060213.0135	36	277	shooting	shoot	Whittington	whittington	his hunting partner Harry M. Whittington	OBJECT	35	YES	NO
RTE6-DEV	NO	677fd86d-b967-4d30-aca6-ff5c133ca790	D0937	NYT_ENG_20060212.0196	1	277	shooting	shoot	Whittington	whittington	his hunting partner Harry M. Whittington	OBJECT	3	YES	YES
RTE6-DEV	NO	889a8f43-7a60-4d04-8663-a1c423ca3c9b	D0937	NYT_ENG_20060212.0196	0	277	shooting	shoot	Whittington	whittington	his hunting partner Harry M. Whittington	OBJECT	3	YES	YES
RTE6-DEV	NO	357518f8-380c-4b97-83d6-3f47543c9be4	D0937	NYT_ENG_20060212.0196	6	277	shooting	shoot	Whittington	whittington	his hunting partner Harry M. Whittington	OBJECT	5	YES	NO
RTE6-DEV	NO	4358f2dd-3749-49c7-a66f-70b18d37443b	D0937	NYT_ENG_20060213.0144	1	277	shooting	shoot	Whittington	whittington	his hunting partner Harry M. Whittington	OBJECT	10	YES	YES
RTE6-DEV	NO	21048972-a7d2-4918-8d7d-4642e7fe1bf5	D0937	NYT_ENG_20060213.0144	26	277	shooting	shoot	Whittington	whittington	his hunting partner Harry M. Whittington	OBJECT	24	YES	NO
RTE6-DEV	NO	6d97622f-edbb-4ae6-8cf1-c3a95d13e7e0	D0937	NYT_ENG_20060213.0144	4	277	shooting	shoot	Whittington	whittington	his hunting partner Harry M. Whittington	OBJECT	10	YES	NO
RTE6-DEV	NO	a038eaba-d35e-4304-ac23-053c72d258cf	D0937	NYT_ENG_20060213.0144	27	277	shooting	shoot	Whittington	whittington	his hunting partner Harry M. Whittington	OBJECT	24	YES	NO
RTE6-DEV	NO	2186a787-fdba-45cc-b5f7-94aca9b36d9c	D0937	NYT_ENG_20060213.0277	1	277	shooting	shoot	Whittington	whittington	his hunting partner Harry M. Whittington	OBJECT	2	YES	NO
RTE6-DEV	NO	20837890-b8c9-4e97-aacd-9c163b52f7f2	D0937	NYT_ENG_20060213.0277	13	277	shooting	shoot	Whittington	whittington	his hunting partner Harry M. Whittington	OBJECT	2	YES	NO
RTE6-DEV	NO	a0f69791-6bf3-4419-b162-7917ab3d63b1	D0937	NYT_ENG_20060213.0277	23	277	shooting	shoot	Whittington	whittington	his hunting partner Harry M. Whittington	OBJECT	26	YES	NO
RTE6-DEV	NO	8cb7d04b-55f1-41d0-b4be-38afe11a9711	D0937	NYT_ENG_20060213.0277	19	277	shooting	shoot	Whittington	whittington	his hunting partner Harry M. Whittington	OBJECT	26	YES	NO
RTE6-DEV	NO	7ee43b2f-95cd-4cfd-adf1-e35e5ba65822	D0937	NYT_ENG_20060213.0277	36	277	shooting	shoot	Whittington	whittington	his hunting partner Harry M. Whittington	OBJECT	26	YES	NO
RTE6-DEV	NO	516fc7b8-c97e-4b93-9260-b9e9a6db89db	D0937	XIN_ENG_20060212.0242	1	277	shooting	shoot	Whittington	whittington	his hunting partner Harry M. Whittington	OBJECT	2	YES	YES
RTE6-DEV	NO	3a14aaee-2b48-4fa5-aaf6-597abb925ec5	D0937	LTW_ENG_20060213.0135	24	279	waited	wait	Cheney	cheney	Vice President Dick Cheney	SUBJECT	21	YES	YES
RTE6-DEV	NO	e94e952e-8375-48e5-bd0c-83818a0545c4	D0937	LTW_ENG_20060213.0135	24	279	go	go	public	public	public	MODIFIER	23	NO	NO
RTE6-DEV	NO	63fd1e29-e3c3-4f8b-82f5-735bb62c2493	D0937	LTW_ENG_20060213.0135	31	279	go	go	public	public	public	MODIFIER	38	NO	NO
RTE6-DEV	NO	97e9de78-4460-4350-8886-3e7cdaae2dce	D0937	NYT_ENG_20060213.0277	28	279	go	go	public	public	public	MODIFIER	37	NO	NO
RTE6-DEV	NO	c9198e0a-8454-410b-9411-80e4dbf9b94f	D0937	NYT_ENG_20060213.0277	31	279	go	go	public	public	public	MODIFIER	37	NO	NO
RTE6-DEV	NO	a91e58f1-db12-4a83-b978-f1f9e189f778	D0937	AFP_ENG_20060213.0741	3	280	issued	issue	office	office	Vice President Dick Cheney 's office	SUBJECT	2	NO	NO
RTE6-DEV	NO	3c02e954-9416-401f-ab03-c22bfaa53dca	D0937	AFP_ENG_20060213.0741	3	280	issued	issue	statement	statement	a statement on behalf of Vice President Dick Cheney	OBJECT	2	NO	NO
RTE6-DEV	NO	dcf6bb4e-865e-40cc-937c-40ef638ffe47	D0937	LTW_ENG_20060213.0135	3	280	issued	issue	office	office	Vice President Dick Cheney 's office	SUBJECT	4	NO	NO
RTE6-DEV	NO	32767819-59bc-470c-9ffc-f51cfd733514	D0937	LTW_ENG_20060213.0135	3	280	issued	issue	statement	statement	a statement on behalf of Vice President Dick Cheney	OBJECT	2	NO	NO
RTE6-DEV	NO	f0c21656-4314-4ccb-95fb-393ebdcd0405	D0937	NYT_ENG_20060213.0277	5	280	issued	issue	office	office	Vice President Dick Cheney 's office	SUBJECT	16	NO	NO
RTE6-DEV	NO	e40cc5e7-3eff-436f-b0b7-01edbdbbb173	D0937	NYT_ENG_20060213.0277	5	280	issued	issue	statement	statement	a statement on behalf of Vice President Dick Cheney	OBJECT	7	NO	NO
RTE6-DEV	NO	d2c96ced-32ab-465c-ad1d-34e5b7f923cd	D0938	NYT_ENG_20041123.0002	9	285	Governor	governor	York	york	New York	OBJECT	9	NO	NO
RTE6-DEV	NO	23f2f9e0-b7a9-46ed-b90a-f4bac71a7ed4	D0938	NYT_ENG_20041123.0002	6	285	Governor	governor	York	york	New York	OBJECT	9	NO	NO
RTE6-DEV	NO	91f79801-4b5a-41ef-aa9b-b3fdd121f96d	D0938	NYT_ENG_20041123.0002	3	285	Governor	governor	York	york	New York	OBJECT	9	NO	NO
RTE6-DEV	NO	422685ce-f793-4a59-8330-b16ebcf0529e	D0938	AFP_ENG_20041201.0756	2	286	Foundation	foundation	World	world	World	UNKNOWN	1	YES	YES
RTE6-DEV	NO	e7ed0c7e-d8ca-4288-94c8-8fa437c9dc4e	D0938	APW_ENG_20050106.0112	1	286	Foundation	foundation	World	world	World	UNKNOWN	1	YES	NO
RTE6-DEV	NO	58910cfb-9212-4b92-9b49-e0f30fed1b9b	D0938	APW_ENG_20050106.0112	1	286	Foundation	foundation	Memorial	memorial	Trade Center Memorial	UNKNOWN	1	YES	NO
RTE6-DEV	NO	cb610a37-f259-407b-ad5c-16590916f61b	D0938	NYT_ENG_20041123.0002	13	286	Foundation	foundation	World	world	World	UNKNOWN	17	NO	NO
RTE6-DEV	NO	35f4ee26-eb05-42fe-ac5c-03646f24263b	D0938	NYT_ENG_20041123.0002	13	286	Foundation	foundation	Memorial	memorial	Trade Center Memorial	UNKNOWN	7	NO	NO
RTE6-DEV	NO	00b2f20d-d8bd-4d2b-a22c-b7b794a36549	D0938	NYT_ENG_20041123.0002	5	286	Foundation	foundation	World	world	World	UNKNOWN	1	YES	YES
RTE6-DEV	NO	802e7c57-babe-4efc-9072-4bee0244adc8	D0938	NYT_ENG_20041201.0359	16	286	Foundation	foundation	World	world	World	UNKNOWN	11	NO	NO
RTE6-DEV	NO	67a12613-a05b-49b9-8fbe-fdbba2e47697	D0938	NYT_ENG_20041201.0359	16	286	Foundation	foundation	Memorial	memorial	Trade Center Memorial	UNKNOWN	16	YES	NO
RTE6-DEV	NO	8cf772a1-41e5-4970-bfe4-4e86e132fb48	D0938	NYT_ENG_20041201.0359	1	286	Foundation	foundation	World	world	World	UNKNOWN	1	YES	NO
RTE6-DEV	NO	b2754653-c9e5-4f41-94bb-2c96db657a0f	D0938	NYT_ENG_20041201.0359	1	286	Foundation	foundation	Memorial	memorial	Trade Center Memorial	UNKNOWN	1	YES	NO
RTE6-DEV	NO	dced62a6-6f6a-4318-a42e-a36118e1fe57	D0938	NYT_ENG_20041201.0359	9	286	Foundation	foundation	World	world	World	UNKNOWN	11	NO	NO
RTE6-DEV	NO	f1dc6ee5-49f2-49a7-bf42-106ee8c97c3c	D0938	NYT_ENG_20041201.0359	9	286	Foundation	foundation	Memorial	memorial	Trade Center Memorial	UNKNOWN	9	YES	NO
RTE6-DEV	NO	96f6f09f-7773-4b64-aac4-da4e94f2edeb	D0938	NYT_ENG_20041201.0359	11	286	Foundation	foundation	World	world	World	UNKNOWN	11	NO	NO
RTE6-DEV	NO	51e1e7b9-a8a5-47eb-aee0-b550d630d7ac	D0938	NYT_ENG_20041201.0359	11	286	Foundation	foundation	Memorial	memorial	Trade Center Memorial	UNKNOWN	9	YES	NO
RTE6-DEV	NO	6f19d694-4230-4b12-8df7-cd7bd23bcc5f	D0938	NYT_ENG_20041201.0359	3	286	Foundation	foundation	World	world	World	UNKNOWN	2	YES	NO
RTE6-DEV	NO	1d862909-9bf2-459c-bb04-79b64370c8d2	D0938	NYT_ENG_20041201.0359	3	286	Foundation	foundation	Memorial	memorial	Trade Center Memorial	UNKNOWN	2	YES	NO
RTE6-DEV	NO	c7235f1b-ccc7-4e39-952d-2885852cdff1	D0938	NYT_ENG_20041201.0359	49	286	Foundation	foundation	World	world	World	UNKNOWN	11	NO	NO
RTE6-DEV	NO	407d0601-070e-40bc-b425-71dd4b79870a	D0938	NYT_ENG_20041201.0359	49	286	Foundation	foundation	Memorial	memorial	Trade Center Memorial	UNKNOWN	49	NO	NO
RTE6-DEV	NO	a6551a7e-2a65-4e71-a8d3-832069888971	D0938	NYT_ENG_20041201.0359	14	286	Foundation	foundation	World	world	World	UNKNOWN	11	NO	NO
RTE6-DEV	NO	84c1acdb-3374-4266-ba9b-713b2e00e4ad	D0938	NYT_ENG_20041201.0359	14	286	Foundation	foundation	Memorial	memorial	Trade Center Memorial	UNKNOWN	13	YES	NO
RTE6-DEV	NO	1e700124-4bea-401a-a030-48a9833df0a3	D0938	NYT_ENG_20050105.0346	0	286	Foundation	foundation	World	world	World	UNKNOWN	1	YES	NO
RTE6-DEV	NO	d563a458-7127-4502-9633-f8e812a0458b	D0938	NYT_ENG_20050105.0346	0	286	Foundation	foundation	Memorial	memorial	Trade Center Memorial	UNKNOWN	0	YES	NO
RTE6-DEV	NO	4f5f4ca8-f5bb-407a-9857-2f1286f52482	D0938	NYT_ENG_20050105.0346	24	286	Foundation	foundation	World	world	World	UNKNOWN	18	YES	NO
RTE6-DEV	NO	1c2fab00-b071-41cf-ae11-1e26cf2ef5db	D0938	NYT_ENG_20050105.0346	24	286	Foundation	foundation	Memorial	memorial	Trade Center Memorial	UNKNOWN	18	YES	NO
RTE6-DEV	NO	5d985f8f-7dca-4dfa-ac7e-54b89386ab12	D0938	NYT_ENG_20050105.0346	45	286	Foundation	foundation	World	world	World	UNKNOWN	39	NO	NO
RTE6-DEV	NO	15a17b3f-c43b-4830-a866-2ab7eedf9146	D0938	NYT_ENG_20050105.0346	45	286	Foundation	foundation	Memorial	memorial	Trade Center Memorial	UNKNOWN	18	YES	NO
RTE6-DEV	NO	e8c6ee7d-531e-41a2-bc93-18a93f824a8a	D0938	NYT_ENG_20050105.0346	10	286	Foundation	foundation	World	world	World	UNKNOWN	13	YES	NO
RTE6-DEV	NO	c480e743-4c18-4c71-bc71-750bfa50f249	D0938	NYT_ENG_20050105.0346	10	286	Foundation	foundation	Memorial	memorial	Trade Center Memorial	UNKNOWN	13	YES	NO
RTE6-DEV	NO	95e7210e-0e67-434d-9f08-0636a78a3c4e	D0938	NYT_ENG_20050105.0346	19	286	Foundation	foundation	World	world	World	UNKNOWN	18	YES	NO
RTE6-DEV	NO	81428a05-8e4d-46fa-9365-4d5fa9dce11d	D0938	NYT_ENG_20050105.0346	19	286	Foundation	foundation	Memorial	memorial	Trade Center Memorial	UNKNOWN	18	YES	NO
RTE6-DEV	NO	da6371ea-0336-4364-ad9f-a7fa477f706d	D0938	NYT_ENG_20050105.0346	5	286	Foundation	foundation	World	world	World	UNKNOWN	3	NO	NO
RTE6-DEV	NO	66af26e6-fc3c-4a6c-87ac-16c25c6e0ceb	D0938	NYT_ENG_20050105.0346	5	286	Foundation	foundation	Memorial	memorial	Trade Center Memorial	UNKNOWN	2	YES	NO
RTE6-DEV	NO	3ff31961-b67c-4f1f-9956-ea6e3aac3cbf	D0938	NYT_ENG_20050105.0346	7	286	Foundation	foundation	World	world	World	UNKNOWN	3	NO	NO
RTE6-DEV	NO	c3794cb2-325f-4cac-bf14-6f0302acfffe	D0938	NYT_ENG_20050105.0346	7	286	Foundation	foundation	Memorial	memorial	Trade Center Memorial	UNKNOWN	2	YES	NO
RTE6-DEV	NO	c9566f51-027c-4f4c-b701-c1bd9ca6162d	D0938	NYT_ENG_20050105.0346	8	286	Foundation	foundation	World	world	World	UNKNOWN	3	NO	NO
RTE6-DEV	NO	14aa8e30-2091-41c1-98a6-72cc47d59958	D0938	NYT_ENG_20050105.0346	8	286	Foundation	foundation	Memorial	memorial	Trade Center Memorial	UNKNOWN	13	NO	NO
RTE6-DEV	NO	7217fb3c-fafa-4ca2-aa86-6500fecd96d4	D0938	NYT_ENG_20041201.0359	8	288	called	call	relatives	relative	Some relatives of Sept. 11 victims	SUBJECT	1	NO	NO
RTE6-DEV	NO	7c22059d-2d1e-43d0-8575-8643457a43ba	D0938	AFP_ENG_20041201.0756	10	292	include	include	members	member	2 members of the World Trade Center Memorial Foundation	OBJECT	4	NO	NO
RTE6-DEV	NO	33a222ce-88b4-43f8-934f-f3825107233f	D0938	AFP_ENG_20041201.0756	2	292	Foundation	foundation	World	world	World	UNKNOWN	1	YES	YES
RTE6-DEV	NO	7e485b4e-d083-4341-a806-555049f869b7	D0938	APW_ENG_20050106.0112	1	292	Foundation	foundation	World	world	World	UNKNOWN	1	YES	NO
RTE6-DEV	NO	3d0381d6-ee82-4388-804f-cf5910004e6f	D0938	APW_ENG_20050106.0112	1	292	Foundation	foundation	Memorial	memorial	Trade Center Memorial	UNKNOWN	1	YES	NO
RTE6-DEV	NO	14872af2-5951-4777-b29c-321288b0e760	D0938	APW_ENG_20050106.0112	7	292	include	include	members	member	2 members of the World Trade Center Memorial Foundation	OBJECT	5	NO	NO
RTE6-DEV	NO	824b62f7-fcc9-46fd-85c6-78712cfade1c	D0938	NYT_ENG_20041123.0002	5	292	Foundation	foundation	World	world	World	UNKNOWN	1	YES	NO
RTE6-DEV	NO	aeb2c0bb-f25b-46b2-a559-fcc828707823	D0938	NYT_ENG_20041123.0002	13	292	Foundation	foundation	World	world	World	UNKNOWN	17	NO	NO
RTE6-DEV	NO	ddf9698c-d104-43b4-9c9e-7914e0f2481e	D0938	NYT_ENG_20041123.0002	13	292	Foundation	foundation	Memorial	memorial	Trade Center Memorial	UNKNOWN	7	NO	NO
RTE6-DEV	NO	c8d8444c-cfa3-4449-bb08-65a2550a504b	D0938	NYT_ENG_20041201.0359	9	292	Foundation	foundation	World	world	World	UNKNOWN	11	NO	NO
RTE6-DEV	NO	03ad7748-0788-4433-be66-31ee592a3e23	D0938	NYT_ENG_20041201.0359	9	292	Foundation	foundation	Memorial	memorial	Trade Center Memorial	UNKNOWN	9	YES	NO
RTE6-DEV	NO	cea0c707-2b8e-45f7-9ba5-ffcf65ae08c6	D0938	NYT_ENG_20041201.0359	1	292	Foundation	foundation	World	world	World	UNKNOWN	1	YES	NO
RTE6-DEV	NO	adfc845c-dad2-4b4e-93d6-46e70d43e115	D0938	NYT_ENG_20041201.0359	1	292	Foundation	foundation	Memorial	memorial	Trade Center Memorial	UNKNOWN	1	YES	NO
RTE6-DEV	NO	4ed7fc08-2e07-4bff-b12a-71332936704e	D0938	NYT_ENG_20041201.0359	16	292	Foundation	foundation	World	world	World	UNKNOWN	11	NO	NO
RTE6-DEV	NO	e09ee0e6-9b42-4a1b-a303-c82a4c9aafba	D0938	NYT_ENG_20041201.0359	16	292	Foundation	foundation	Memorial	memorial	Trade Center Memorial	UNKNOWN	16	YES	NO
RTE6-DEV	NO	27ee0364-83f5-40b3-8b5e-aa2fd51af873	D0938	NYT_ENG_20041201.0359	11	292	Foundation	foundation	World	world	World	UNKNOWN	11	NO	NO
RTE6-DEV	NO	0006ca91-7e41-4a02-9523-2bd3ea77a4ad	D0938	NYT_ENG_20041201.0359	11	292	Foundation	foundation	Memorial	memorial	Trade Center Memorial	UNKNOWN	9	YES	NO
RTE6-DEV	NO	147d9280-bef0-456b-9232-8f887ec04d95	D0938	NYT_ENG_20041201.0359	3	292	Foundation	foundation	World	world	World	UNKNOWN	2	YES	NO
RTE6-DEV	NO	f113ae46-9bf6-4414-ba55-ac7ad6c5f31e	D0938	NYT_ENG_20041201.0359	3	292	Foundation	foundation	Memorial	memorial	Trade Center Memorial	UNKNOWN	2	YES	NO
RTE6-DEV	NO	dbd9f887-e8b1-440e-9f0f-37865c007d71	D0938	NYT_ENG_20041201.0359	49	292	Foundation	foundation	World	world	World	UNKNOWN	11	NO	NO
RTE6-DEV	NO	db96ed19-e459-4f44-9f09-5b67bc7f01b4	D0938	NYT_ENG_20041201.0359	49	292	Foundation	foundation	Memorial	memorial	Trade Center Memorial	UNKNOWN	49	NO	NO
RTE6-DEV	NO	f9976fab-372a-479d-a800-8720db2ebca5	D0938	NYT_ENG_20041201.0359	14	292	Foundation	foundation	World	world	World	UNKNOWN	11	NO	NO
RTE6-DEV	NO	5b7f7bcb-821f-488b-a6b6-b57f2a57b6c4	D0938	NYT_ENG_20041201.0359	14	292	Foundation	foundation	Memorial	memorial	Trade Center Memorial	UNKNOWN	13	YES	NO
RTE6-DEV	NO	41cdf283-8efe-46d8-ac5b-8d4731e722f4	D0938	NYT_ENG_20041201.0359	17	292	include	include	members	member	2 members of the World Trade Center Memorial Foundation	OBJECT	16	NO	NO
RTE6-DEV	NO	0460cace-7478-4473-9393-c0b373af949e	D0938	NYT_ENG_20050105.0346	0	292	Foundation	foundation	World	world	World	UNKNOWN	1	YES	NO
RTE6-DEV	NO	651a2002-36fb-44a8-bf6d-a7ab09659c0c	D0938	NYT_ENG_20050105.0346	0	292	Foundation	foundation	Memorial	memorial	Trade Center Memorial	UNKNOWN	0	YES	NO
RTE6-DEV	NO	07ca0f7d-39df-49cb-98e4-7752c0d61726	D0938	NYT_ENG_20050105.0346	5	292	Foundation	foundation	World	world	World	UNKNOWN	3	NO	NO
RTE6-DEV	NO	62ad7566-39ad-495a-afac-708718fcbff0	D0938	NYT_ENG_20050105.0346	5	292	Foundation	foundation	Memorial	memorial	Trade Center Memorial	UNKNOWN	2	YES	NO
RTE6-DEV	NO	4b5e1196-4a7f-4ff4-aabb-0dd15b99c8ef	D0938	NYT_ENG_20050105.0346	3	292	include	include	members	member	2 members of the World Trade Center Memorial Foundation	OBJECT	32	NO	NO
RTE6-DEV	NO	86611207-1df4-48fc-941d-db08bb77b4d5	D0938	NYT_ENG_20050105.0346	10	292	Foundation	foundation	World	world	World	UNKNOWN	13	YES	NO
RTE6-DEV	NO	200203c3-81d3-4b96-b902-d35b064803c8	D0938	NYT_ENG_20050105.0346	10	292	Foundation	foundation	Memorial	memorial	Trade Center Memorial	UNKNOWN	13	YES	NO
RTE6-DEV	NO	05ba6e3f-8784-4d71-aaab-0c193ffe8ce0	D0938	NYT_ENG_20050105.0346	19	292	Foundation	foundation	World	world	World	UNKNOWN	18	YES	NO
RTE6-DEV	NO	cd8b1d34-f6ca-4cbc-8a8d-6553f4bdda8b	D0938	NYT_ENG_20050105.0346	19	292	Foundation	foundation	Memorial	memorial	Trade Center Memorial	UNKNOWN	18	YES	NO
RTE6-DEV	NO	ee6ea436-c9f2-456f-bda5-0b3006a025d9	D0938	NYT_ENG_20050105.0346	7	292	Foundation	foundation	World	world	World	UNKNOWN	3	NO	NO
RTE6-DEV	NO	ff3e82ac-bc5f-4787-a898-72a839b5dedc	D0938	NYT_ENG_20050105.0346	7	292	Foundation	foundation	Memorial	memorial	Trade Center Memorial	UNKNOWN	2	YES	NO
RTE6-DEV	NO	baff2051-b75f-4aad-99e2-45a2a9bfdb93	D0938	NYT_ENG_20050105.0346	8	292	Foundation	foundation	World	world	World	UNKNOWN	3	NO	NO
RTE6-DEV	NO	016331da-9b88-47dc-a295-5d7c84c43efb	D0938	NYT_ENG_20050105.0346	8	292	Foundation	foundation	Memorial	memorial	Trade Center Memorial	UNKNOWN	13	NO	NO
RTE6-DEV	NO	f7edcb81-4241-4086-8117-17c9b0e024de	D0938	NYT_ENG_20050105.0346	24	292	Foundation	foundation	World	world	World	UNKNOWN	18	YES	NO
RTE6-DEV	NO	cb4608ed-9b28-4570-becd-be1e94039fd0	D0938	NYT_ENG_20050105.0346	24	292	Foundation	foundation	Memorial	memorial	Trade Center Memorial	UNKNOWN	18	YES	NO
RTE6-DEV	NO	ba8aa3f4-1a12-4ba2-b618-25426b75eb7d	D0938	NYT_ENG_20050105.0346	45	292	Foundation	foundation	World	world	World	UNKNOWN	39	NO	NO
RTE6-DEV	NO	a040198a-af46-4979-a0f8-6e402c70a623	D0938	NYT_ENG_20050105.0346	45	292	Foundation	foundation	Memorial	memorial	Trade Center Memorial	UNKNOWN	18	YES	NO
RTE6-DEV	NO	43ca74be-edaa-4144-a2ae-167c58b789cc	D0938	NYT_ENG_20041201.0359	8	294	called	call	Burlingame	burlingame	Debra Burlingame and others	SUBJECT	26	NO	NO
RTE6-DEV	NO	e99b2484-64c1-409f-b226-8b5bfac3ff01	D0938	NYT_ENG_20050105.0346	20	296	use	use	dollars	dollar	public dollars	OBJECT	12	NO	NO
RTE6-DEV	NO	f221ae3d-cebc-476e-bf24-485d77b4175b	D0938	APW_ENG_20050106.0112	2	297	building	building	Tower	tower	Freedom Tower	UNKNOWN	3	NO	NO
RTE6-DEV	NO	e88949f1-8d1f-4961-8ec5-ef4649628ec9	D0938	NYT_ENG_20041123.0002	17	297	building	building	Tower	tower	Freedom Tower	UNKNOWN	14	NO	NO
RTE6-DEV	NO	001bb5f2-304d-46de-9305-763c5410987d	D0938	NYT_ENG_20041123.0002	16	297	building	building	Tower	tower	Freedom Tower	UNKNOWN	14	NO	NO
RTE6-DEV	NO	efbe2f76-2561-49d7-b5ed-b27a717f7946	D0938	NYT_ENG_20041201.0359	17	297	building	building	Tower	tower	Freedom Tower	UNKNOWN	23	NO	NO
RTE6-DEV	NO	ea7ed2ab-76d6-4b2b-98ed-ede264e8aab7	D0938	NYT_ENG_20041201.0359	1	297	building	building	Tower	tower	Freedom Tower	UNKNOWN	23	NO	NO
RTE6-DEV	NO	d7772203-b90d-447c-9ff5-48ef7e0be6c8	D0938	NYT_ENG_20041201.0359	13	297	building	building	Tower	tower	Freedom Tower	UNKNOWN	23	NO	NO
RTE6-DEV	NO	982bcfc3-78c8-4695-a1ae-cff272350ff7	D0938	NYT_ENG_20041216.0211	4	298	take	take	Pataki	pataki	George Pataki	SUBJECT	10	NO	NO
RTE6-DEV	NO	64c57439-4525-4240-a1f1-3813e2da4491	D0938	AFP_ENG_20041201.0756	2	301	named	name	president	president	president of the World Trade Center Memorial Foundation	OBJECT	4	NO	NO
RTE6-DEV	NO	7f70d9eb-e6cd-42fc-9bc2-cfa6cc4374b7	D0938	AFP_ENG_20041201.0756	2	301	Foundation	foundation	World	world	World	UNKNOWN	1	YES	NO
RTE6-DEV	NO	c10e2e81-28a9-4038-b81f-9909afbacc36	D0938	AFP_ENG_20041201.0756	4	301	named	name	president	president	president of the World Trade Center Memorial Foundation	OBJECT	4	NO	NO
RTE6-DEV	NO	b7a9df00-123b-42b1-958b-ad699f91f111	D0938	APW_ENG_20050106.0112	1	301	Foundation	foundation	World	world	World	UNKNOWN	1	YES	NO
RTE6-DEV	NO	326e02c0-8049-45fb-bf4a-3918270d0bb6	D0938	APW_ENG_20050106.0112	1	301	Foundation	foundation	Memorial	memorial	Trade Center Memorial	UNKNOWN	1	YES	NO
RTE6-DEV	NO	9f30f0b2-8aed-4bdd-b5fd-727ec371faef	D0938	NYT_ENG_20041123.0002	13	301	Foundation	foundation	World	world	World	UNKNOWN	17	NO	NO
RTE6-DEV	NO	b8de598e-9eff-4b68-b2d9-cde41e81eea6	D0938	NYT_ENG_20041123.0002	13	301	Foundation	foundation	Memorial	memorial	Trade Center Memorial	UNKNOWN	7	NO	NO
RTE6-DEV	NO	d33f93e3-e779-4173-8ed3-efdd3b068bd5	D0938	NYT_ENG_20041123.0002	5	301	Foundation	foundation	World	world	World	UNKNOWN	1	YES	NO
RTE6-DEV	NO	bfcbc41c-8c4a-4596-af32-046ce1ba025e	D0938	NYT_ENG_20041201.0359	1	301	Foundation	foundation	World	world	World	UNKNOWN	1	YES	NO
RTE6-DEV	NO	89cd609f-44f2-4676-ab02-89df6a186cc8	D0938	NYT_ENG_20041201.0359	1	301	Foundation	foundation	Memorial	memorial	Trade Center Memorial	UNKNOWN	1	YES	NO
RTE6-DEV	NO	5d5dff51-ab7e-46a9-b100-0b7a24662d4d	D0938	NYT_ENG_20041201.0359	9	301	Foundation	foundation	World	world	World	UNKNOWN	11	NO	NO
RTE6-DEV	NO	d7e2bb0a-64d7-4802-aab4-4e8d57bdf18d	D0938	NYT_ENG_20041201.0359	9	301	Foundation	foundation	Memorial	memorial	Trade Center Memorial	UNKNOWN	9	YES	NO
RTE6-DEV	NO	55179d79-976d-4e91-b21e-88bff1af4d89	D0938	NYT_ENG_20041201.0359	2	301	named	name	president	president	president of the World Trade Center Memorial Foundation	OBJECT	15	NO	NO
RTE6-DEV	NO	2ccf54b1-031e-4e5d-9bb6-6ec05f4460db	D0938	NYT_ENG_20041201.0359	0	301	named	name	president	president	president of the World Trade Center Memorial Foundation	OBJECT	15	NO	NO
RTE6-DEV	NO	0b789844-7898-4bbc-88ea-e4d1b43881ca	D0938	NYT_ENG_20041201.0359	16	301	Foundation	foundation	World	world	World	UNKNOWN	11	NO	NO
RTE6-DEV	NO	94425dc0-60ef-4c9f-aee7-68ddfd5777da	D0938	NYT_ENG_20041201.0359	16	301	Foundation	foundation	Memorial	memorial	Trade Center Memorial	UNKNOWN	16	YES	NO
RTE6-DEV	NO	b51b507e-207e-4378-9166-76ce44cc6c21	D0938	NYT_ENG_20041201.0359	11	301	Foundation	foundation	World	world	World	UNKNOWN	11	NO	NO
RTE6-DEV	NO	5ffba7f1-c03f-4bf2-9329-6f792b07f7b5	D0938	NYT_ENG_20041201.0359	11	301	Foundation	foundation	Memorial	memorial	Trade Center Memorial	UNKNOWN	9	YES	NO
RTE6-DEV	NO	f15af194-37c2-4b36-b558-9b2d9e8e7fb1	D0938	NYT_ENG_20041201.0359	49	301	Foundation	foundation	World	world	World	UNKNOWN	11	NO	NO
RTE6-DEV	NO	e743aa5f-513f-40ec-a1ac-b5f5d5cf378c	D0938	NYT_ENG_20041201.0359	49	301	Foundation	foundation	Memorial	memorial	Trade Center Memorial	UNKNOWN	49	NO	NO
RTE6-DEV	NO	8836de0e-6e3f-46cf-974a-eadec609c040	D0938	NYT_ENG_20041201.0359	14	301	Foundation	foundation	World	world	World	UNKNOWN	11	NO	NO
RTE6-DEV	NO	2d630fcc-44e4-4eca-8c28-ce532736f5cd	D0938	NYT_ENG_20041201.0359	14	301	Foundation	foundation	Memorial	memorial	Trade Center Memorial	UNKNOWN	13	YES	NO
RTE6-DEV	NO	22f88ed3-939c-4971-adfe-a8473d3a5bb1	D0938	NYT_ENG_20041201.0359	3	301	Foundation	foundation	World	world	World	UNKNOWN	2	YES	NO
RTE6-DEV	NO	c9c7401a-ccec-4952-892e-46dfcfd050d0	D0938	NYT_ENG_20041201.0359	3	301	Foundation	foundation	Memorial	memorial	Trade Center Memorial	UNKNOWN	2	YES	NO
RTE6-DEV	NO	47014cc1-57ca-43ed-bd95-3395c4930706	D0938	NYT_ENG_20050105.0346	0	301	Foundation	foundation	World	world	World	UNKNOWN	1	YES	NO
RTE6-DEV	NO	5b315654-e809-4e61-a289-5f5d91e8b624	D0938	NYT_ENG_20050105.0346	0	301	Foundation	foundation	Memorial	memorial	Trade Center Memorial	UNKNOWN	0	YES	NO
RTE6-DEV	NO	c0c11d80-501d-4e4c-ace7-e188e6387405	D0938	NYT_ENG_20050105.0346	45	301	Foundation	foundation	World	world	World	UNKNOWN	39	NO	NO
RTE6-DEV	NO	c89a4776-6121-423a-bcd8-42eaebb908cc	D0938	NYT_ENG_20050105.0346	45	301	Foundation	foundation	Memorial	memorial	Trade Center Memorial	UNKNOWN	18	YES	NO
RTE6-DEV	NO	7f805c1f-d8fc-4345-b457-1bcd2084f196	D0938	NYT_ENG_20050105.0346	30	301	named	name	president	president	president of the World Trade Center Memorial Foundation	OBJECT	45	NO	NO
RTE6-DEV	NO	0bde6c8f-9664-4642-8663-9937c1f22eb1	D0938	NYT_ENG_20050105.0346	10	301	Foundation	foundation	World	world	World	UNKNOWN	13	YES	NO
RTE6-DEV	NO	974719e5-5385-44fb-8898-7f99cbfb6eae	D0938	NYT_ENG_20050105.0346	10	301	Foundation	foundation	Memorial	memorial	Trade Center Memorial	UNKNOWN	13	YES	NO
RTE6-DEV	NO	6352a6c7-a915-4590-8c28-a93683069e55	D0938	NYT_ENG_20050105.0346	19	301	Foundation	foundation	World	world	World	UNKNOWN	18	YES	NO
RTE6-DEV	NO	a9cffccc-8d19-4e31-9cf5-e98a1cc932b5	D0938	NYT_ENG_20050105.0346	19	301	Foundation	foundation	Memorial	memorial	Trade Center Memorial	UNKNOWN	18	YES	NO
RTE6-DEV	NO	771f1fc0-bb6f-45a6-b941-e0c4bca4121a	D0938	NYT_ENG_20050105.0346	5	301	Foundation	foundation	World	world	World	UNKNOWN	3	NO	NO
RTE6-DEV	NO	3d70019f-7bdf-4723-9db1-b55cd2879c5e	D0938	NYT_ENG_20050105.0346	5	301	Foundation	foundation	Memorial	memorial	Trade Center Memorial	UNKNOWN	2	YES	NO
RTE6-DEV	NO	35f63ce8-a79d-454e-9fca-4299983d0b8e	D0938	NYT_ENG_20050105.0346	7	301	Foundation	foundation	World	world	World	UNKNOWN	3	NO	NO
RTE6-DEV	NO	706d390c-1f1b-405b-8996-97e926752855	D0938	NYT_ENG_20050105.0346	7	301	Foundation	foundation	Memorial	memorial	Trade Center Memorial	UNKNOWN	2	YES	NO
RTE6-DEV	NO	a9ea8805-f4e5-43a1-84a9-580a777f5456	D0938	NYT_ENG_20050105.0346	8	301	Foundation	foundation	World	world	World	UNKNOWN	3	NO	NO
RTE6-DEV	NO	cc985a94-4aac-4507-897f-b3710dd84fd1	D0938	NYT_ENG_20050105.0346	8	301	Foundation	foundation	Memorial	memorial	Trade Center Memorial	UNKNOWN	13	NO	NO
RTE6-DEV	NO	85653286-1cb3-4db8-a8e6-9850a478a0f3	D0938	NYT_ENG_20050105.0346	24	301	Foundation	foundation	World	world	World	UNKNOWN	18	YES	NO
RTE6-DEV	NO	524f90db-5318-4995-a6a3-dee88852c735	D0938	NYT_ENG_20050105.0346	24	301	Foundation	foundation	Memorial	memorial	Trade Center Memorial	UNKNOWN	18	YES	NO
RTE6-DEV	NO	132a388e-2138-48f8-b4f1-9a226115d935	D0938	AFP_ENG_20041201.0756	2	302	Foundation	foundation	Center	center	World Trade Center	UNKNOWN	1	YES	NO
RTE6-DEV	NO	fa53b6d0-c940-4124-9326-682f424de0c0	D0938	APW_ENG_20050106.0112	1	302	Foundation	foundation	Center	center	World Trade Center	UNKNOWN	1	YES	NO
RTE6-DEV	NO	528e0682-bea7-4468-9b6a-f873ea21c24b	D0938	APW_ENG_20050106.0112	1	302	Foundation	foundation	Memorial	memorial	Memorial	UNKNOWN	1	YES	NO
RTE6-DEV	NO	ed355bfe-b8e6-4dda-8930-f48202538a13	D0938	NYT_ENG_20041123.0002	13	302	Foundation	foundation	Memorial	memorial	Memorial	UNKNOWN	7	NO	NO
RTE6-DEV	NO	1820388a-8e59-451d-9608-b8b8eca59f27	D0938	NYT_ENG_20041123.0002	5	302	Foundation	foundation	Center	center	World Trade Center	UNKNOWN	5	NO	NO
RTE6-DEV	NO	5dbd5856-faf7-45dd-b1c5-a2c6f26cf092	D0938	NYT_ENG_20041201.0359	9	302	Foundation	foundation	Center	center	World Trade Center	UNKNOWN	9	YES	NO
RTE6-DEV	NO	3f639d2d-ff74-4feb-a156-43579be262e0	D0938	NYT_ENG_20041201.0359	9	302	Foundation	foundation	Memorial	memorial	Memorial	UNKNOWN	9	YES	NO
RTE6-DEV	NO	0e5855e4-a4aa-4cd4-853d-b0cdf7ffcbf6	D0938	NYT_ENG_20041201.0359	11	302	Foundation	foundation	Center	center	World Trade Center	UNKNOWN	11	NO	NO
RTE6-DEV	NO	293da7c4-6f1d-4ce1-a140-cb4aebf511f4	D0938	NYT_ENG_20041201.0359	11	302	Foundation	foundation	Memorial	memorial	Memorial	UNKNOWN	9	YES	NO
RTE6-DEV	NO	5ce050b1-bd53-4b56-ba07-dc111ed5ab11	D0938	NYT_ENG_20041201.0359	49	302	Foundation	foundation	Center	center	World Trade Center	UNKNOWN	47	NO	NO
RTE6-DEV	NO	c59ffa55-0e2c-4806-b0dd-8cd527b8425f	D0938	NYT_ENG_20041201.0359	49	302	Foundation	foundation	Memorial	memorial	Memorial	UNKNOWN	49	NO	NO
RTE6-DEV	NO	85861a44-9751-47a1-a585-d82cacc20b9a	D0938	NYT_ENG_20041201.0359	16	302	Foundation	foundation	Center	center	World Trade Center	UNKNOWN	17	NO	NO
RTE6-DEV	NO	823dab51-b02e-4579-90a6-e40b4e651d98	D0938	NYT_ENG_20041201.0359	16	302	Foundation	foundation	Memorial	memorial	Memorial	UNKNOWN	16	YES	NO
RTE6-DEV	NO	6c216cd9-39bb-40c5-851e-3e3c5c0f0e41	D0938	NYT_ENG_20041201.0359	3	302	Foundation	foundation	Center	center	World Trade Center	UNKNOWN	2	YES	NO
RTE6-DEV	NO	4726a119-30fa-47ed-a7a2-7b447fdb058b	D0938	NYT_ENG_20041201.0359	3	302	Foundation	foundation	Memorial	memorial	Memorial	UNKNOWN	2	YES	NO
RTE6-DEV	NO	79443afc-58c0-44aa-a157-9fac9cbc5ab2	D0938	NYT_ENG_20050105.0346	0	302	Foundation	foundation	Center	center	World Trade Center	UNKNOWN	0	YES	NO
RTE6-DEV	NO	3205d201-6243-4a6e-b1fe-052a7eaffb63	D0938	NYT_ENG_20050105.0346	0	302	Foundation	foundation	Memorial	memorial	Memorial	UNKNOWN	0	YES	NO
RTE6-DEV	NO	8509d18a-faef-4b35-86c3-9779a623aee7	D0938	NYT_ENG_20050105.0346	10	302	Foundation	foundation	Center	center	World Trade Center	UNKNOWN	13	YES	NO
RTE6-DEV	NO	c1bcacbe-1f23-4eff-9c5a-c00241932ae0	D0938	NYT_ENG_20050105.0346	10	302	Foundation	foundation	Memorial	memorial	Memorial	UNKNOWN	13	YES	NO
RTE6-DEV	NO	e9bd6390-5423-4d73-8a5f-777952307831	D0938	NYT_ENG_20050105.0346	19	302	Foundation	foundation	Center	center	World Trade Center	UNKNOWN	18	YES	NO
RTE6-DEV	NO	5e2d1020-052c-47d4-8342-e6ce92df16b9	D0938	NYT_ENG_20050105.0346	19	302	Foundation	foundation	Memorial	memorial	Memorial	UNKNOWN	18	YES	NO
RTE6-DEV	NO	9dab5a43-3da6-4bd2-b9f2-e555bef6ca85	D0938	NYT_ENG_20050105.0346	5	302	Foundation	foundation	Center	center	World Trade Center	UNKNOWN	6	YES	NO
RTE6-DEV	NO	2adc7fa8-ccd2-4e93-9517-7eac6f271dda	D0938	NYT_ENG_20050105.0346	5	302	Foundation	foundation	Memorial	memorial	Memorial	UNKNOWN	2	YES	NO
RTE6-DEV	NO	17bba3e8-88f0-4524-8e33-1390f3854816	D0938	NYT_ENG_20050105.0346	7	302	Foundation	foundation	Center	center	World Trade Center	UNKNOWN	6	YES	NO
RTE6-DEV	NO	9ade444a-577b-46df-8bd3-7f17968e590c	D0938	NYT_ENG_20050105.0346	7	302	Foundation	foundation	Memorial	memorial	Memorial	UNKNOWN	2	YES	NO
RTE6-DEV	NO	991dbcf0-3384-40ae-82b2-97e150776649	D0938	NYT_ENG_20050105.0346	8	302	Foundation	foundation	Center	center	World Trade Center	UNKNOWN	6	NO	NO
RTE6-DEV	NO	2dc71777-ccea-44c6-905b-5dad5471dfa5	D0938	NYT_ENG_20050105.0346	8	302	Foundation	foundation	Memorial	memorial	Memorial	UNKNOWN	13	NO	NO
RTE6-DEV	NO	13dcff16-f22e-4a5b-b6ea-5f25aff84f02	D0938	NYT_ENG_20050105.0346	24	302	Foundation	foundation	Center	center	World Trade Center	UNKNOWN	18	YES	NO
RTE6-DEV	NO	5077e11c-b819-4483-824a-f649773ae45b	D0938	NYT_ENG_20050105.0346	24	302	Foundation	foundation	Memorial	memorial	Memorial	UNKNOWN	18	YES	NO
RTE6-DEV	NO	702e76da-288f-488e-8e81-1e2f698a13fc	D0938	NYT_ENG_20050105.0346	45	302	Foundation	foundation	Center	center	World Trade Center	UNKNOWN	39	NO	NO
RTE6-DEV	NO	895e6b2d-0269-48ee-8ad7-52b42d6e54e2	D0938	NYT_ENG_20050105.0346	45	302	Foundation	foundation	Memorial	memorial	Memorial	UNKNOWN	18	YES	NO
RTE6-DEV	NO	724e46dc-47d6-48e2-99b5-4be4e8cc4d02	D0938	AFP_ENG_20041201.0756	2	303	Foundation	foundation	Center	center	World Trade Center	UNKNOWN	1	YES	NO
RTE6-DEV	NO	31d91a04-c4eb-4cd9-821e-b9c6a96b4f70	D0938	AFP_ENG_20041201.0756	11	303	created	create	Foundation	foundation	The World Trade Center Memorial Foundation	OBJECT	2	NO	NO
RTE6-DEV	NO	41e39482-0bc3-43c6-99d5-ee97f3790392	D0938	APW_ENG_20050106.0112	9	303	created	create	Foundation	foundation	The World Trade Center Memorial Foundation	OBJECT	5	NO	NO
RTE6-DEV	NO	195da0f6-d8a0-45d2-8da8-ea75ba75256c	D0938	APW_ENG_20050106.0112	6	303	raise	raise	money	money	money	OBJECT	1	YES	YES
RTE6-DEV	NO	26c9a20d-6a49-41ff-bca7-f044272915e5	D0938	APW_ENG_20050106.0112	6	303	raise	raise	Foundation	foundation	The World Trade Center Memorial Foundation	SUBJECT	5	YES	YES
RTE6-DEV	NO	c5f51d21-f762-42a2-bf95-cb2ddb16cd68	D0938	NYT_ENG_20041123.0002	13	303	Foundation	foundation	Memorial	memorial	Memorial	UNKNOWN	7	NO	NO
RTE6-DEV	NO	832af216-5b5a-406d-b8df-75d19ca442cb	D0938	NYT_ENG_20041201.0359	11	303	raise	raise	Foundation	foundation	The World Trade Center Memorial Foundation	SUBJECT	11	YES	NO
RTE6-DEV	NO	6e88f0dc-be26-40e9-8c10-d0f63ea2ee8c	D0938	NYT_ENG_20041201.0359	11	303	Foundation	foundation	Center	center	World Trade Center	UNKNOWN	11	NO	NO
RTE6-DEV	NO	a861c875-adb9-4c0b-9a2c-fd9d6d61ddca	D0938	NYT_ENG_20041201.0359	11	303	Foundation	foundation	Memorial	memorial	Memorial	UNKNOWN	9	YES	NO
RTE6-DEV	NO	95d15163-536c-4ff0-993b-b8bfe7f0d05e	D0938	NYT_ENG_20041201.0359	1	303	raise	raise	money	money	money	OBJECT	11	YES	YES
RTE6-DEV	NO	25babb32-6b04-4403-80ab-e713efa26cab	D0938	NYT_ENG_20041201.0359	1	303	raise	raise	Foundation	foundation	The World Trade Center Memorial Foundation	SUBJECT	1	YES	NO
RTE6-DEV	NO	37bbede6-ba8c-41ae-9d01-64de82d94868	D0938	NYT_ENG_20041201.0359	1	303	Foundation	foundation	Center	center	World Trade Center	UNKNOWN	1	YES	NO
RTE6-DEV	NO	f740a92c-46b1-45fe-b75f-f7e78477cbf3	D0938	NYT_ENG_20041201.0359	1	303	Foundation	foundation	Memorial	memorial	Memorial	UNKNOWN	1	YES	NO
RTE6-DEV	NO	ea75ff34-ba47-4034-8e6d-44525a82bff9	D0938	NYT_ENG_20041201.0359	0	303	raise	raise	money	money	money	OBJECT	11	YES	YES
RTE6-DEV	NO	6aa184ab-ecae-4211-81da-931eafa44269	D0938	NYT_ENG_20041201.0359	0	303	raise	raise	Foundation	foundation	The World Trade Center Memorial Foundation	SUBJECT	1	YES	NO
RTE6-DEV	NO	3734bba2-f654-48ec-8c74-6e6b75266643	D0938	NYT_ENG_20041201.0359	49	303	Foundation	foundation	Center	center	World Trade Center	UNKNOWN	47	NO	NO
RTE6-DEV	NO	28eee04e-bc83-4253-8cc5-1251e4c61c8c	D0938	NYT_ENG_20041201.0359	49	303	Foundation	foundation	Memorial	memorial	Memorial	UNKNOWN	49	NO	NO
RTE6-DEV	NO	2de7b54a-c3e7-44c3-827d-405c04de2e73	D0938	NYT_ENG_20041201.0359	16	303	Foundation	foundation	Center	center	World Trade Center	UNKNOWN	17	NO	NO
RTE6-DEV	NO	2d5dd7db-b619-4fee-85ab-ef14b5b3aba0	D0938	NYT_ENG_20041201.0359	16	303	Foundation	foundation	Memorial	memorial	Memorial	UNKNOWN	16	YES	NO
RTE6-DEV	NO	912ed5b8-dc4a-4f18-b652-18c61560d50b	D0938	NYT_ENG_20041201.0359	14	303	Foundation	foundation	Center	center	World Trade Center	UNKNOWN	11	NO	NO
RTE6-DEV	NO	97947c14-db97-45a2-a3f2-1a554ee5a1cc	D0938	NYT_ENG_20041201.0359	14	303	Foundation	foundation	Memorial	memorial	Memorial	UNKNOWN	13	YES	NO
RTE6-DEV	NO	6d801614-8551-4355-b44d-a65bb21b79db	D0938	NYT_ENG_20041201.0359	3	303	Foundation	foundation	Center	center	World Trade Center	UNKNOWN	2	YES	NO
RTE6-DEV	NO	e97fb24d-4962-491f-ae70-8bc42c206756	D0938	NYT_ENG_20041201.0359	3	303	Foundation	foundation	Memorial	memorial	Memorial	UNKNOWN	2	YES	NO
RTE6-DEV	NO	0b16da1f-37ee-4b1b-95e3-cf667cba4421	D0938	NYT_ENG_20041216.0211	11	303	created	create	Foundation	foundation	The World Trade Center Memorial Foundation	OBJECT	8	NO	NO
RTE6-DEV	NO	3ba14320-dd78-4468-8b07-c2921fcb7557	D0938	NYT_ENG_20050105.0346	0	303	Foundation	foundation	Center	center	World Trade Center	UNKNOWN	0	YES	NO
RTE6-DEV	NO	c5700fb5-6903-489a-8d85-ea2a9c187a37	D0938	NYT_ENG_20050105.0346	0	303	Foundation	foundation	Memorial	memorial	Memorial	UNKNOWN	0	YES	NO
RTE6-DEV	NO	ae9490e2-6f6a-4a9f-9a75-4d49a95f1e3f	D0938	NYT_ENG_20050105.0346	19	303	Foundation	foundation	Center	center	World Trade Center	UNKNOWN	18	YES	NO
RTE6-DEV	NO	31215c25-b52a-43b8-b3e2-2dd1dfcf90d9	D0938	NYT_ENG_20050105.0346	19	303	Foundation	foundation	Memorial	memorial	Memorial	UNKNOWN	18	YES	NO
RTE6-DEV	NO	ff78b53b-6316-477a-b5e1-f619a21868c9	D0938	NYT_ENG_20050105.0346	5	303	Foundation	foundation	Center	center	World Trade Center	UNKNOWN	6	YES	NO
RTE6-DEV	NO	42daf6bf-6944-40d2-9ea1-efb5815d542e	D0938	NYT_ENG_20050105.0346	5	303	Foundation	foundation	Memorial	memorial	Memorial	UNKNOWN	2	YES	NO
RTE6-DEV	NO	01e02186-9e40-4f1e-a98f-760c45d7d820	D0938	NYT_ENG_20050105.0346	7	303	Foundation	foundation	Center	center	World Trade Center	UNKNOWN	6	YES	NO
RTE6-DEV	NO	28fa8fe3-f28d-445d-9b03-99f3e8bed0b5	D0938	NYT_ENG_20050105.0346	7	303	Foundation	foundation	Memorial	memorial	Memorial	UNKNOWN	2	YES	NO
RTE6-DEV	NO	d0ac9bd5-7ace-44e8-9233-822b71e307b9	D0938	NYT_ENG_20050105.0346	8	303	Foundation	foundation	Center	center	World Trade Center	UNKNOWN	6	NO	NO
RTE6-DEV	NO	5d12ab1c-9524-44a2-8786-eec1046307ec	D0938	NYT_ENG_20050105.0346	8	303	Foundation	foundation	Memorial	memorial	Memorial	UNKNOWN	13	NO	NO
RTE6-DEV	NO	f987b931-0f78-4360-95c0-e34d3837ccd6	D0938	NYT_ENG_20050105.0346	24	303	Foundation	foundation	Center	center	World Trade Center	UNKNOWN	18	YES	NO
RTE6-DEV	NO	1588f9fa-17de-4c2e-a7c5-48db6befe4d8	D0938	NYT_ENG_20050105.0346	24	303	Foundation	foundation	Memorial	memorial	Memorial	UNKNOWN	18	YES	NO
RTE6-DEV	NO	40e18f60-e3a9-48a7-814e-d4161da385c4	D0938	NYT_ENG_20050105.0346	45	303	Foundation	foundation	Center	center	World Trade Center	UNKNOWN	39	NO	NO
RTE6-DEV	NO	c2059d3c-b7d0-438d-bff0-3b2613363f68	D0938	NYT_ENG_20050105.0346	45	303	Foundation	foundation	Memorial	memorial	Memorial	UNKNOWN	18	YES	NO
RTE6-DEV	NO	4488ae0c-5ffa-48df-b6e4-40a33b3c9370	D0938	AFP_ENG_20041122.0626	5	304	run	run	memorial	memorial	the memorial	OBJECT	6	NO	NO
RTE6-DEV	NO	18c8a444-6f71-46d0-a5a3-2f8c311b72b4	D0938	AFP_ENG_20041122.0626	5	304	run	run	Foundation	foundation	The World Trade Center Memorial Foundation	SUBJECT	2	NO	NO
RTE6-DEV	NO	2e0d9f11-ed32-4ade-9c57-5d2dda477a6c	D0938	AFP_ENG_20041201.0756	2	304	Foundation	foundation	Center	center	World Trade Center	UNKNOWN	1	YES	NO
RTE6-DEV	NO	b58e4a07-29ab-4d46-b6bb-e18384929964	D0938	AFP_ENG_20041201.0756	11	304	created	create	Foundation	foundation	The World Trade Center Memorial Foundation	OBJECT	2	NO	NO
RTE6-DEV	NO	ae020653-d905-471d-a8bd-e55b58adc5a6	D0938	AFP_ENG_20041201.0756	8	304	run	run	memorial	memorial	the memorial	OBJECT	7	NO	NO
RTE6-DEV	NO	17eff8ff-1090-4771-96a0-b9ddd5a4a8f5	D0938	AFP_ENG_20041201.0756	8	304	run	run	Foundation	foundation	The World Trade Center Memorial Foundation	SUBJECT	2	NO	NO
RTE6-DEV	NO	6ceb211b-7c3c-4fce-8496-b55fd1cff93c	D0938	APW_ENG_20050106.0112	1	304	Foundation	foundation	Center	center	World Trade Center	UNKNOWN	1	YES	NO
RTE6-DEV	NO	b2cf7ec5-2122-4e05-aff0-0254670e6e5b	D0938	APW_ENG_20050106.0112	1	304	Foundation	foundation	Memorial	memorial	Memorial	UNKNOWN	1	YES	NO
RTE6-DEV	NO	bc9bcbd0-daf3-4868-af8b-0bc0dca3ac33	D0938	APW_ENG_20050106.0112	9	304	created	create	Foundation	foundation	The World Trade Center Memorial Foundation	OBJECT	5	NO	NO
RTE6-DEV	NO	4858a2c9-3741-4f4b-9c91-db296e35e4de	D0938	NYT_ENG_20041123.0002	5	304	Foundation	foundation	Center	center	World Trade Center	UNKNOWN	5	YES	NO
RTE6-DEV	NO	d76be5ee-b42a-4b10-8174-1f72ca6ecded	D0938	NYT_ENG_20041123.0002	13	304	Foundation	foundation	Memorial	memorial	Memorial	UNKNOWN	7	NO	NO
RTE6-DEV	NO	d2c1d489-f5fb-45d5-98f3-de742d79029c	D0938	NYT_ENG_20041123.0002	2	304	Foundation	foundation	Center	center	World Trade Center	UNKNOWN	1	NO	NO
RTE6-DEV	NO	c6937e30-1d08-47b6-900c-3993fc50732f	D0938	NYT_ENG_20041201.0359	1	304	Foundation	foundation	Center	center	World Trade Center	UNKNOWN	1	YES	NO
RTE6-DEV	NO	90876e39-7fe8-430d-8f9c-4545e71146ac	D0938	NYT_ENG_20041201.0359	1	304	Foundation	foundation	Memorial	memorial	Memorial	UNKNOWN	1	YES	NO
RTE6-DEV	NO	84875329-c631-4029-b2f3-343ee0f38371	D0938	NYT_ENG_20041201.0359	9	304	Foundation	foundation	Center	center	World Trade Center	UNKNOWN	9	YES	NO
RTE6-DEV	NO	958b7e78-168a-4b02-949a-53b17c076beb	D0938	NYT_ENG_20041201.0359	9	304	Foundation	foundation	Memorial	memorial	Memorial	UNKNOWN	9	YES	NO
RTE6-DEV	NO	6c032760-3588-4b72-86d3-22e755014df1	D0938	NYT_ENG_20041201.0359	11	304	Foundation	foundation	Center	center	World Trade Center	UNKNOWN	11	NO	NO
RTE6-DEV	NO	d3305940-cbd0-4af1-896f-09fb8750f0ca	D0938	NYT_ENG_20041201.0359	11	304	Foundation	foundation	Memorial	memorial	Memorial	UNKNOWN	9	YES	NO
RTE6-DEV	NO	d725301f-bb50-46d7-b93a-6f8d11e7d8d6	D0938	NYT_ENG_20041201.0359	49	304	Foundation	foundation	Center	center	World Trade Center	UNKNOWN	47	NO	NO
RTE6-DEV	NO	acaabf89-b3a6-4297-ad7c-108a2d313809	D0938	NYT_ENG_20041201.0359	49	304	Foundation	foundation	Memorial	memorial	Memorial	UNKNOWN	49	NO	NO
RTE6-DEV	NO	98a1577d-7cad-488f-bb8f-62805a11cf7d	D0938	NYT_ENG_20041201.0359	16	304	Foundation	foundation	Center	center	World Trade Center	UNKNOWN	17	NO	NO
RTE6-DEV	NO	784f9f04-24d0-4446-b2a1-fb1842ecef33	D0938	NYT_ENG_20041201.0359	16	304	Foundation	foundation	Memorial	memorial	Memorial	UNKNOWN	16	YES	NO
RTE6-DEV	NO	4657a81a-25d5-469a-ae84-66dfc9a665fd	D0938	NYT_ENG_20041201.0359	14	304	Foundation	foundation	Center	center	World Trade Center	UNKNOWN	11	NO	NO
RTE6-DEV	NO	0121b543-e789-4ec9-9571-e88d8b0f9b37	D0938	NYT_ENG_20041201.0359	14	304	Foundation	foundation	Memorial	memorial	Memorial	UNKNOWN	13	YES	NO
RTE6-DEV	NO	26705a8b-cce8-417a-b00d-f48b90212227	D0938	NYT_ENG_20041201.0359	3	304	Foundation	foundation	Center	center	World Trade Center	UNKNOWN	2	YES	NO
RTE6-DEV	NO	d49d3b40-e42d-4a08-b900-316f31860dae	D0938	NYT_ENG_20041201.0359	3	304	Foundation	foundation	Memorial	memorial	Memorial	UNKNOWN	2	YES	NO
RTE6-DEV	NO	3f745c8b-c58a-4126-aa17-37ae730dcaf7	D0938	NYT_ENG_20041216.0211	11	304	created	create	Foundation	foundation	The World Trade Center Memorial Foundation	OBJECT	8	NO	NO
RTE6-DEV	NO	5c56f318-1f64-4699-95d8-b6741a0e0644	D0938	NYT_ENG_20050105.0346	0	304	Foundation	foundation	Center	center	World Trade Center	UNKNOWN	0	YES	NO
RTE6-DEV	NO	6ebb5353-f823-491a-91f8-3c3d8154d424	D0938	NYT_ENG_20050105.0346	0	304	Foundation	foundation	Memorial	memorial	Memorial	UNKNOWN	0	YES	NO
RTE6-DEV	NO	e940f9a6-83b0-4eaf-b4a2-57fb4f82ff25	D0938	NYT_ENG_20050105.0346	10	304	Foundation	foundation	Center	center	World Trade Center	UNKNOWN	13	YES	NO
RTE6-DEV	NO	1efceb35-ec0a-421c-9885-00c0eef829b7	D0938	NYT_ENG_20050105.0346	10	304	Foundation	foundation	Memorial	memorial	Memorial	UNKNOWN	13	YES	NO
RTE6-DEV	NO	ed60ed51-aa32-4645-84f1-d749775a657d	D0938	NYT_ENG_20050105.0346	19	304	Foundation	foundation	Center	center	World Trade Center	UNKNOWN	18	YES	NO
RTE6-DEV	NO	76610a27-34e8-446f-b469-e2b31e6ce6bf	D0938	NYT_ENG_20050105.0346	19	304	Foundation	foundation	Memorial	memorial	Memorial	UNKNOWN	18	YES	NO
RTE6-DEV	NO	2f087e7b-62e7-4666-875f-b57dddf657d5	D0938	NYT_ENG_20050105.0346	5	304	Foundation	foundation	Center	center	World Trade Center	UNKNOWN	6	YES	NO
RTE6-DEV	NO	ff79e4e1-5843-4861-8707-0f0d1a5cc191	D0938	NYT_ENG_20050105.0346	5	304	Foundation	foundation	Memorial	memorial	Memorial	UNKNOWN	2	YES	NO
RTE6-DEV	NO	9f57c766-67a1-4ea0-87f2-22bd2f7449ec	D0938	NYT_ENG_20050105.0346	7	304	Foundation	foundation	Center	center	World Trade Center	UNKNOWN	6	YES	NO
RTE6-DEV	NO	e5e067c8-1e89-422d-b329-2755d42bf96a	D0938	NYT_ENG_20050105.0346	7	304	Foundation	foundation	Memorial	memorial	Memorial	UNKNOWN	2	YES	NO
RTE6-DEV	NO	bc9b7473-5584-4542-af85-41c6dc04cbe2	D0938	NYT_ENG_20050105.0346	8	304	Foundation	foundation	Center	center	World Trade Center	UNKNOWN	6	NO	NO
RTE6-DEV	NO	701a1814-8425-458c-930f-7fc854e859d3	D0938	NYT_ENG_20050105.0346	8	304	Foundation	foundation	Memorial	memorial	Memorial	UNKNOWN	13	NO	NO
RTE6-DEV	NO	67df64b1-6160-4f57-9612-ac2e55fdfe71	D0938	APW_ENG_20050106.0112	2	305	buildings	building	Memorial	memorial	the World Trade Center Memorial	UNKNOWN	2	NO	NO
RTE6-DEV	NO	5ca40e65-be9e-46a4-980f-a71e64476b6b	D0938	APW_ENG_20050106.0112	3	305	buildings	building	Memorial	memorial	the World Trade Center Memorial	UNKNOWN	3	NO	NO
RTE6-DEV	NO	75ddbc18-e31b-4efc-913c-0b5bb23c0aba	D0938	NYT_ENG_20041123.0002	17	305	buildings	building	Memorial	memorial	the World Trade Center Memorial	UNKNOWN	7	NO	NO
RTE6-DEV	NO	9385f1d9-6103-4987-8348-4841cf57cd2c	D0938	NYT_ENG_20041123.0002	13	305	buildings	building	Memorial	memorial	the World Trade Center Memorial	UNKNOWN	7	NO	NO
RTE6-DEV	NO	ac2918aa-0a00-4625-a249-cb325c139517	D0938	NYT_ENG_20041123.0002	16	305	buildings	building	Memorial	memorial	the World Trade Center Memorial	UNKNOWN	7	NO	NO
RTE6-DEV	NO	9c42bf58-4714-4f0a-a40c-010535aa7038	D0938	NYT_ENG_20041201.0359	9	305	buildings	building	Memorial	memorial	the World Trade Center Memorial	UNKNOWN	9	YES	NO
RTE6-DEV	NO	c3893694-710b-4bd7-b4df-0b13632e95bf	D0938	NYT_ENG_20041201.0359	10	305	buildings	building	Memorial	memorial	the World Trade Center Memorial	UNKNOWN	9	YES	NO
RTE6-DEV	NO	a58a6074-7637-4fd3-9db2-f578955cb995	D0938	NYT_ENG_20041201.0359	17	305	buildings	building	Memorial	memorial	the World Trade Center Memorial	UNKNOWN	16	NO	NO
RTE6-DEV	NO	a8ed1229-5814-4459-9c6a-cbcc43c98173	D0938	NYT_ENG_20041216.0211	1	305	buildings	building	Memorial	memorial	the World Trade Center Memorial	UNKNOWN	1	NO	NO
RTE6-DEV	NO	3dad3646-687d-41fc-a936-67cad3745a1f	D0938	APW_ENG_20050106.0112	2	306	buildings	building	Memorial	memorial	the World Trade Center Memorial	UNKNOWN	2	NO	NO
RTE6-DEV	NO	2a8b9c55-ef7f-4057-bb2a-39439777fca8	D0938	APW_ENG_20050106.0112	3	306	buildings	building	Memorial	memorial	the World Trade Center Memorial	UNKNOWN	3	NO	NO
RTE6-DEV	NO	dcd4f48b-a8e5-4075-a2dc-31c37fe1840d	D0938	NYT_ENG_20041123.0002	17	306	buildings	building	Memorial	memorial	the World Trade Center Memorial	UNKNOWN	7	NO	NO
RTE6-DEV	NO	5b2b155d-62f9-4151-bc23-56f359689852	D0938	NYT_ENG_20041123.0002	13	306	buildings	building	Memorial	memorial	the World Trade Center Memorial	UNKNOWN	7	NO	NO
RTE6-DEV	NO	248391cf-f221-4067-9a23-a95cbb25efee	D0938	NYT_ENG_20041123.0002	16	306	buildings	building	Memorial	memorial	the World Trade Center Memorial	UNKNOWN	7	NO	NO
RTE6-DEV	NO	92306a83-3c02-4d56-9e0d-df25579f7ecf	D0938	NYT_ENG_20041201.0359	9	306	buildings	building	Memorial	memorial	the World Trade Center Memorial	UNKNOWN	9	YES	NO
RTE6-DEV	NO	5e2e719b-41a4-45d9-aab4-34fefdca0f51	D0938	NYT_ENG_20041201.0359	10	306	buildings	building	Memorial	memorial	the World Trade Center Memorial	UNKNOWN	9	YES	NO
RTE6-DEV	NO	cb5570c4-d710-40c9-8dee-68d630557f8a	D0938	NYT_ENG_20041201.0359	17	306	buildings	building	Memorial	memorial	the World Trade Center Memorial	UNKNOWN	16	NO	NO
RTE6-DEV	NO	b5b02c88-e6c9-46b8-aec0-014cddb1bca1	D0938	NYT_ENG_20041216.0211	1	306	buildings	building	Memorial	memorial	the World Trade Center Memorial	UNKNOWN	1	NO	NO
RTE6-DEV	NO	c6845c94-571c-4967-b34b-3e1b5eafa810	D0938	NYT_ENG_20041201.0359	16	311	Development	development	Manhattan	manhattan	Manhattan	UNKNOWN	13	YES	NO
RTE6-DEV	NO	19e80ffc-4247-41cc-b440-5a0fb476a5b7	D0938	NYT_ENG_20041201.0359	49	311	Development	development	Manhattan	manhattan	Manhattan	UNKNOWN	56	NO	NO
RTE6-DEV	NO	dd9e1bea-a4a4-4999-91ab-c9f8ef89272a	D0938	NYT_ENG_20041201.0359	5	311	Development	development	Manhattan	manhattan	Manhattan	UNKNOWN	3	NO	NO
RTE6-DEV	NO	6b8ffe36-988b-4b01-9f1a-de0e22c40c8f	D0938	NYT_ENG_20050105.0346	9	311	Development	development	Manhattan	manhattan	Manhattan	UNKNOWN	7	YES	NO
RTE6-DEV	NO	dd49ca3b-aae2-42f8-904f-504a7ed0aced	D0938	NYT_ENG_20050105.0346	24	311	Development	development	Manhattan	manhattan	Manhattan	UNKNOWN	33	YES	NO
RTE6-DEV	NO	ba68ccdf-eda8-4d73-a825-9e86602f5516	D0938	NYT_ENG_20050105.0346	45	311	Development	development	Manhattan	manhattan	Manhattan	UNKNOWN	33	YES	NO
RTE6-DEV	NO	f02c84dd-2f39-4ebe-89b9-040c39bfa9c3	D0938	NYT_ENG_20050105.0346	18	311	Development	development	Manhattan	manhattan	Manhattan	UNKNOWN	7	NO	NO
RTE6-DEV	NO	7c963df7-031a-4a85-ac84-4359d844e977	D0938	NYT_ENG_20050302.0320	32	311	Development	development	Manhattan	manhattan	Manhattan	UNKNOWN	32	NO	NO
RTE6-DEV	NO	2301b00e-c963-43cc-9a1c-45745e88f6ce	D0938	NYT_ENG_20050302.0320	20	311	Development	development	Manhattan	manhattan	Manhattan	UNKNOWN	15	YES	NO
RTE6-DEV	NO	4e0f1516-e7dc-4ec3-8ff0-1d158dda2502	D0938	NYT_ENG_20041201.0359	49	312	Development	development	Manhattan	manhattan	Manhattan	UNKNOWN	56	NO	NO
RTE6-DEV	NO	ae419576-a8a3-4237-8e80-312b38629ac3	D0938	NYT_ENG_20041201.0359	5	312	Development	development	Manhattan	manhattan	Manhattan	UNKNOWN	3	NO	NO
RTE6-DEV	NO	3b72ea8f-6d83-4abe-aac2-b3745ce08c92	D0938	NYT_ENG_20050105.0346	24	312	Development	development	Manhattan	manhattan	Manhattan	UNKNOWN	33	YES	NO
RTE6-DEV	NO	3126031a-545a-4a53-9989-4a5e964c58ce	D0938	NYT_ENG_20050105.0346	9	312	Development	development	Manhattan	manhattan	Manhattan	UNKNOWN	7	YES	NO
RTE6-DEV	NO	11a81904-0591-4305-8533-d1d5b5597204	D0938	NYT_ENG_20050105.0346	18	312	Development	development	Manhattan	manhattan	Manhattan	UNKNOWN	7	NO	NO
RTE6-DEV	NO	0ab4550f-a767-480c-bc71-9c175a779f1e	D0938	NYT_ENG_20050302.0320	32	312	Development	development	Manhattan	manhattan	Manhattan	UNKNOWN	32	NO	NO
RTE6-DEV	NO	683fb223-33be-4f50-bedc-a69cb7717997	D0938	AFP_ENG_20041201.0756	10	319	includes	include	pools	pool	twin reflecting pools	OBJECT	8	NO	NO
RTE6-DEV	NO	71d7ca66-0a8a-426d-8c4d-eeea2a2ee81c	D0938	APW_ENG_20050106.0112	5	319	includes	include	pools	pool	twin reflecting pools	OBJECT	7	NO	NO
RTE6-DEV	NO	20365a69-692a-467e-a1ff-30dc223cfb7b	D0938	APW_ENG_20050106.0112	7	319	reflecting	reflect	twin	twin	twin	SUBJECT	3	NO	NO
RTE6-TEST	YES	fd4736b3-4604-4740-9fba-a4e3864096ff	D0901	APW_ENG_20050321.0478	2	593	link	link	India	india	India and Pakistan	SUBJECT	2	YES	NO
RTE6-TEST	YES	666b2ab9-5c69-4077-a565-aebf2f6b0d88	D0901	APW_ENG_20050321.0478	2	593	agreed	agree	service	service	the bus service	OBJECT	1	YES	NO
RTE6-TEST	YES	59416612-97a5-4d97-bc33-5e811b8c42f4	D0901	APW_ENG_20050408.0034	13	593	link	link	Kashmir	kashmir	divided Kashmir	OBJECT	13	YES	NO
RTE6-TEST	YES	16b44bce-85e3-46d5-b12b-8f491c4781e8	D0901	APW_ENG_20050408.0034	13	593	link	link	India	india	India and Pakistan	SUBJECT	13	NO	NO
RTE6-TEST	YES	4a160fca-718d-4f92-95fe-e5541cd1530f	D0901	APW_ENG_20050321.0478	3	594	runs	run	service	service	A bus service	SUBJECT	1	YES	NO
RTE6-TEST	YES	388b329a-6e0f-4693-917e-5a743e40a0c0	D0901	AFP_ENG_20050312.0019	1	608	divided	divide	Kashmir	kashmir	Kashmir	OBJECT	1	YES	NO
RTE6-TEST	YES	b77342c4-8fa1-42ca-ad1f-2884f504ecb6	D0901	AFP_ENG_20050312.0019	1	608	divided	divide	India	india	India and Pakistan	OBJECT	1	YES	NO
RTE6-TEST	YES	c306a859-3613-40a4-b125-b106863c2293	D0901	AFP_ENG_20050312.0019	5	608	divided	divide	Kashmir	kashmir	Kashmir	OBJECT	4	YES	YES
RTE6-TEST	YES	a0f83209-fc29-4e17-9473-47b011045c74	D0901	AFP_ENG_20050312.0019	5	608	divided	divide	India	india	India and Pakistan	OBJECT	5	YES	NO
RTE6-TEST	YES	5b59425a-4dac-499a-ab03-7f5769cf1f2f	D0901	APW_ENG_20041119.0095	1	608	divided	divide	India	india	India and Pakistan	OBJECT	1	NO	NO
RTE6-TEST	YES	aed08af0-b4ae-4ab3-ae9a-796d0beee095	D0901	APW_ENG_20050321.0478	1	608	divided	divide	Kashmir	kashmir	Kashmir	OBJECT	1	YES	NO
RTE6-TEST	YES	533aa9cf-967d-457c-88a0-1d4c8438d2d4	D0901	APW_ENG_20050321.0478	1	608	divided	divide	India	india	India and Pakistan	OBJECT	0	YES	NO
RTE6-TEST	YES	0175bcfe-f2c8-43eb-a14f-2378fb36282c	D0901	APW_ENG_20050408.0034	1	608	divided	divide	Kashmir	kashmir	Kashmir	OBJECT	1	YES	YES
RTE6-TEST	YES	1a906ad2-1e8d-4b91-8daf-10ac412583e5	D0901	APW_ENG_20050408.0034	1	608	divided	divide	India	india	India and Pakistan	OBJECT	13	YES	NO
RTE6-TEST	YES	c919a55b-9cf6-4095-a2ea-8c687df283ff	D0901	LTW_ENG_20041123.0130	16	608	divided	divide	Kashmir	kashmir	Kashmir	OBJECT	15	YES	YES
RTE6-TEST	YES	907c9744-0804-45df-9b2f-18e3cd15bbe5	D0901	LTW_ENG_20041123.0130	16	608	divided	divide	India	india	India and Pakistan	OBJECT	16	NO	NO
RTE6-TEST	YES	99f113a2-a8b7-41ee-8f0a-f94f9314dc00	D0901	LTW_ENG_20041123.0130	19	608	divided	divide	Kashmir	kashmir	Kashmir	OBJECT	18	YES	YES
RTE6-TEST	YES	3cf9ef84-4ae1-4f65-9f93-ff45f1944c64	D0901	LTW_ENG_20041123.0130	19	608	divided	divide	India	india	India and Pakistan	OBJECT	18	YES	NO
RTE6-TEST	YES	e9f642c8-b9be-4715-96b8-7787233345d2	D0901	AFP_ENG_20050312.0019	4	609	claimed	claim	Kashmir	kashmir	Kashmir	OBJECT	4	YES	NO
RTE6-TEST	YES	48c3ede9-c476-412d-a569-f156f4ab55e5	D0901	AFP_ENG_20050312.0019	4	609	claimed	claim	full	full	full	OBJECT	4	YES	NO
RTE6-TEST	YES	acb0d229-a4cd-4c09-97e1-1fb192e0629c	D0901	AFP_ENG_20050312.0019	4	609	claimed	claim	India	india	India and Pakistan	SUBJECT	5	YES	YES
RTE6-TEST	YES	91474093-111c-4b3b-b521-4c3c29007c26	D0901	APW_ENG_20041118.0129	9	609	claimed	claim	Kashmir	kashmir	Kashmir	OBJECT	9	YES	YES
RTE6-TEST	YES	80a97a0d-a044-447d-891b-0f224264cdab	D0901	APW_ENG_20041118.0129	9	609	claimed	claim	India	india	India and Pakistan	SUBJECT	9	YES	NO
RTE6-TEST	YES	8a33ac82-8744-4bfa-a1ab-90c57659d614	D0901	APW_ENG_20050408.0034	13	609	claimed	claim	Kashmir	kashmir	Kashmir	OBJECT	13	YES	YES
RTE6-TEST	YES	94f0bbdb-bd76-4647-b11f-abc794c60fe6	D0901	APW_ENG_20050408.0034	13	609	claimed	claim	India	india	India and Pakistan	SUBJECT	13	YES	YES
RTE6-TEST	YES	ca9c2dce-8adb-4e8d-ba88-7e7e96694bcc	D0901	APW_ENG_20041119.0095	15	612	dispute	dispute	India	india	India and Pakistan	SUBJECT	15	YES	NO
RTE6-TEST	YES	a8a37ec2-75d6-47ab-8327-f28305732c4b	D0901	APW_ENG_20041119.0095	15	612	dispute	dispute	Kashmir	kashmir	Kashmir	UNKNOWN	15	YES	NO
RTE6-TEST	YES	a8a42717-cee7-4de6-b9d8-33a9c2036d94	D0901	LTW_ENG_20041118.0101	3	612	dispute	dispute	India	india	India and Pakistan	SUBJECT	2	YES	NO
RTE6-TEST	YES	f1a4a95e-3165-4669-a650-27d0da3b2783	D0901	LTW_ENG_20041118.0101	3	612	dispute	dispute	Kashmir	kashmir	Kashmir	UNKNOWN	2	YES	YES
RTE6-TEST	YES	02bf1f2f-e855-4aab-a8e6-a86e3f323013	D0902	AFP_ENG_20050303.0593	1	419	prevents	prevent	pill	pill	The morning-after pill	SUBJECT	1	YES	NO
RTE6-TEST	YES	2827204b-a007-4690-aa12-baeb8da62d97	D0902	APW_ENG_20041017.0142	9	419	prevents	prevent	pill	pill	The morning-after pill	SUBJECT	11	YES	YES
RTE6-TEST	YES	06266b61-9a6f-40e6-9159-e757da1949ed	D0902	APW_ENG_20050116.0677	4	419	prevents	prevent	pill	pill	The morning-after pill	SUBJECT	4	YES	NO
RTE6-TEST	YES	0d389e64-2910-4a0b-87ef-17ac43c3d1d7	D0902	APW_ENG_20050116.0677	6	419	prevents	prevent	pill	pill	The morning-after pill	SUBJECT	7	YES	YES
RTE6-TEST	YES	838dbb23-36c8-4352-a978-b1616f4494f4	D0902	APW_ENG_20050116.0677	31	419	prevents	prevent	pill	pill	The morning-after pill	SUBJECT	30	YES	YES
RTE6-TEST	YES	8eca62c2-0c10-4799-9be3-ca02fbe1ee5a	D0902	APW_ENG_20050116.0677	31	419	prevents	prevent	pregnancy	pregnancy	pregnancy	OBJECT	34	YES	YES
RTE6-TEST	YES	9180b9a3-87de-40d9-a307-497dc099b8fc	D0902	LTW_ENG_20041025.0079	11	419	prevents	prevent	pill	pill	The morning-after pill	SUBJECT	7	YES	YES
RTE6-TEST	YES	9adc5c06-4630-4fb6-99a2-495f3849c4ae	D0902	LTW_ENG_20050104.0119	15	419	prevents	prevent	pill	pill	The morning-after pill	SUBJECT	15	NO	NO
RTE6-TEST	YES	1b18a803-b7bb-45f2-ab9e-e5065a953168	D0902	NYT_ENG_20041130.0307	21	419	prevents	prevent	pill	pill	The morning-after pill	SUBJECT	21	YES	NO
RTE6-TEST	YES	2fa84e49-013e-48ac-93d6-679bae0e9300	D0902	APW_ENG_20050116.0677	2	420	known	know	contraceptive	contraceptive	The emergency contraceptive	OBJECT	21	YES	NO
RTE6-TEST	YES	fba3656e-5c40-43e1-8415-6d31e9d88ae9	D0902	APW_ENG_20050116.0677	0	427	sold	sell	contraceptive	contraceptive	an emergency contraceptive	OBJECT	21	YES	YES
RTE6-TEST	YES	25264961-283a-49fd-a1c5-c2046c76d1a2	D0902	APW_ENG_20050116.0677	0	427	sold	sell	counter	counter	the counter	OBJECT	5	YES	NO
RTE6-TEST	YES	df90fb99-8b3a-465b-9076-3d80ef2625d7	D0902	APW_ENG_20050116.0677	2	427	sold	sell	contraceptive	contraceptive	an emergency contraceptive	OBJECT	21	YES	YES
RTE6-TEST	YES	92626934-2b5e-4eb8-afe8-ba35f9e0dd54	D0902	APW_ENG_20050116.0677	2	427	sold	sell	counter	counter	the counter	OBJECT	5	YES	NO
RTE6-TEST	YES	bf2b27c1-b85b-4df9-91a4-f3213b95d2fb	D0902	APW_ENG_20050116.0677	19	427	sold	sell	contraceptive	contraceptive	an emergency contraceptive	OBJECT	21	YES	YES
RTE6-TEST	YES	f9c9cc66-2ce7-402e-927b-f584401cff98	D0902	APW_ENG_20050116.0677	19	427	sold	sell	counter	counter	the counter	OBJECT	19	YES	NO
RTE6-TEST	YES	f548af3e-b8c3-405e-bd47-cbdbdaee2a96	D0902	LTW_ENG_20050107.0099	3	427	sold	sell	contraceptive	contraceptive	an emergency contraceptive	OBJECT	4	YES	YES
RTE6-TEST	YES	2d87ef7c-4df4-49fe-8406-08ce8c5dacbe	D0902	LTW_ENG_20050107.0099	6	427	sold	sell	contraceptive	contraceptive	an emergency contraceptive	OBJECT	4	YES	YES
RTE6-TEST	YES	bf22cf91-942d-4c30-9c8e-7eef94c4c816	D0902	LTW_ENG_20050107.0099	6	427	sold	sell	counter	counter	the counter	OBJECT	3	YES	NO
RTE6-TEST	YES	78bd8eaa-9298-4567-89cc-ea18c1b5d640	D0902	LTW_ENG_20050104.0119	4	428	allow	allow	Administration	administration	The Food and Drug Administration	SUBJECT	4	YES	NO
RTE6-TEST	YES	42d2dcef-8d78-4944-8023-fb1ba7da78c6	D0902	LTW_ENG_20050104.0119	6	428	refused	refuse	Administration	administration	The Food and Drug Administration	SUBJECT	4	NO	NO
RTE6-TEST	YES	1904cbae-03df-46e2-82b7-3d1c6faa9f1a	D0902	LTW_ENG_20050107.0099	3	428	allow	allow	sales	sales	over-the-counter sales of Plan B.	OBJECT	16	YES	NO
RTE6-TEST	YES	1b9a52fc-6aaa-4a26-bc44-8a0ef62f8509	D0902	LTW_ENG_20050107.0099	3	428	allow	allow	Administration	administration	The Food and Drug Administration	SUBJECT	1	YES	NO
RTE6-TEST	YES	c8d5f978-f3d0-4cbc-9e9a-3500967c2bee	D0902	APW_ENG_20041011.0452	5	444	taken	take	pill	pill	The morning-after pill	OBJECT	4	YES	YES
RTE6-TEST	YES	feb9ec1f-563d-4201-8f6b-9564d38f0804	D0902	APW_ENG_20041017.0142	8	444	taken	take	pill	pill	The morning-after pill	OBJECT	11	YES	YES
RTE6-TEST	YES	35c924aa-50a3-4f3b-8cd3-314ea37efa35	D0902	APW_ENG_20050116.0677	34	444	taken	take	pill	pill	The morning-after pill	OBJECT	33	YES	YES
RTE6-TEST	YES	b8dac76d-a016-4e4b-b001-d7ccaa6ca23b	D0902	NYT_ENG_20041130.0307	21	444	taken	take	pill	pill	The morning-after pill	OBJECT	21	YES	NO
RTE6-TEST	YES	747918d7-e1db-4e5d-bb5d-ed2727b17f62	D0902	APW_ENG_20050116.0677	31	445	prevents	prevent	pill	pill	The morning-after pill	SUBJECT	30	YES	YES
RTE6-TEST	YES	5551bd01-88c5-4463-8634-039dc97b77e3	D0902	APW_ENG_20050116.0677	31	445	prevents	prevent	pregnancies	pregnancy	pregnancies	OBJECT	34	YES	YES
RTE6-TEST	YES	49fd45f1-6aed-4927-bb68-91918e1d7316	D0902	APW_ENG_20050116.0677	31	446	prevents	prevent	pill	pill	The morning-after pill	SUBJECT	30	YES	YES
RTE6-TEST	YES	6173abe4-c68d-4968-9a73-58acc3f2e990	D0902	APW_ENG_20050116.0677	31	446	prevents	prevent	pregnancies	pregnancy	pregnancies	OBJECT	34	YES	YES
RTE6-TEST	YES	c501167f-f345-41f8-b3b2-7991038a31f7	D0902	APW_ENG_20050116.0677	26	447	manufactured	manufacture	B	b	Plan B	OBJECT	23	YES	YES
RTE6-TEST	YES	eadb20b8-b017-4342-baa8-848ef9bba87a	D0902	APW_ENG_20050116.0677	26	447	manufactured	manufacture	Laboratories	laboratories	Barr Laboratories	SUBJECT	26	YES	NO
RTE6-TEST	YES	01c48a0e-c845-4e1d-a254-296280ac8e08	D0902	APW_ENG_20041017.0142	5	448	sale	sale	pill	pill	the pill 's	UNKNOWN	2	YES	YES
RTE6-TEST	YES	fc966bf0-0a9c-40c3-8600-47ca06d3b15a	D0902	APW_ENG_20050116.0677	2	448	sale	sale	pill	pill	the pill 's	UNKNOWN	0	YES	YES
RTE6-TEST	YES	db45184b-4489-45cc-8bec-cd30ecf544df	D0902	LTW_ENG_20041025.0079	13	448	sale	sale	pill	pill	the pill 's	UNKNOWN	7	YES	YES
RTE6-TEST	YES	5ec824c8-fcc8-40cf-a7ec-136959ca3abf	D0902	LTW_ENG_20050107.0099	6	448	sale	sale	pill	pill	the pill 's	UNKNOWN	2	YES	YES
RTE6-TEST	YES	dce6b5f8-bce3-4ebd-9e9a-4fcc26265cca	D0907	LTW_ENG_20050525.0042	37	543	served	serve	Yoo	yoo	John Yoo	SUBJECT	36	YES	YES
RTE6-TEST	YES	df243537-1170-47a0-9632-b6611863b2fa	D0907	LTW_ENG_20050525.0042	37	543	served	serve	Department	department	the Justice Department	OBJECT	40	NO	NO
RTE6-TEST	YES	a8785fbe-34a3-4c4b-9485-26195634a1e3	D0907	LTW_ENG_20050525.0042	40	543	served	serve	Yoo	yoo	John Yoo	SUBJECT	40	YES	NO
RTE6-TEST	YES	07ae3458-19d2-494b-bae4-9fbddd27c129	D0907	LTW_ENG_20050525.0042	40	543	served	serve	Department	department	the Justice Department	OBJECT	40	YES	NO
RTE6-TEST	YES	85926d14-3848-4589-875b-bb7617ee8bd1	D0907	LTW_ENG_20050525.0042	11	547	worked	work	Department	department	the Justice Department	OBJECT	3	NO	NO
RTE6-TEST	YES	bd1d27dc-440c-4d7f-94f6-b3a18949c085	D0907	NYT_ENG_20050104.0212	26	549	wrote	write	Yoo	yoo	John Yoo	SUBJECT	26	YES	YES
RTE6-TEST	YES	2f1f3fab-5f5b-45cd-863f-b16ad991e901	D0907	NYT_ENG_20050104.0212	26	549	wrote	write	memo	memo	a memo	OBJECT	30	YES	YES
RTE6-TEST	YES	31c73d8b-4dde-4939-861e-6eb74648144a	D0907	LTW_ENG_20050525.0042	3	589	apply	apply	war	war	the war against al-Qaida	OBJECT	1	NO	NO
RTE6-TEST	YES	b65d1029-a542-43c2-825d-08808290f599	D0913	AFP_ENG_20050302.0458	1	459	displays	display	Commandments	commandments	Commandments	UNKNOWN	1	YES	NO
RTE6-TEST	YES	7a7b3459-c8e3-4e27-a337-54abf050f4a2	D0913	AFP_ENG_20050302.0458	1	459	displays	display	property	property	government property	UNKNOWN	2	YES	YES
RTE6-TEST	YES	6e544826-ba1e-4982-b4d5-a047d07c1fd0	D0913	AFP_ENG_20050302.0577	1	459	displays	display	property	property	government property	UNKNOWN	2	YES	YES
RTE6-TEST	YES	4489c207-effc-4384-a56d-aaa0a50fb913	D0913	AFP_ENG_20050302.0458	2	460	displays	display	Commandments	commandments	Commandments	UNKNOWN	1	YES	NO
RTE6-TEST	YES	d8e9cad0-5ef3-4537-8fec-db5774365245	D0913	LTW_ENG_20050302.0134	23	460	displays	display	Commandments	commandments	Commandments	UNKNOWN	24	YES	YES
RTE6-TEST	YES	c2a6614c-5450-4938-906a-ac263f378880	D0913	NYT_ENG_20050302.0107	2	460	displays	display	Texas	texas	Texas	UNKNOWN	2	YES	NO
RTE6-TEST	YES	bb734544-f325-4d85-b967-9f65c54465dc	D0913	NYT_ENG_20050302.0107	31	460	displays	display	Commandments	commandments	Commandments	UNKNOWN	36	YES	NO
RTE6-TEST	YES	3b97f2d0-513d-4bf3-b4e0-ffd55976a6ec	D0913	NYT_ENG_20050302.0156	3	460	displays	display	Commandments	commandments	Commandments	UNKNOWN	2	YES	YES
RTE6-TEST	YES	cb5e6964-4543-4045-a609-e24bfb7cf5bd	D0913	NYT_ENG_20050302.0156	5	460	displays	display	Commandments	commandments	Commandments	UNKNOWN	4	YES	NO
RTE6-TEST	YES	d1855538-7c92-4b83-9a93-e34b68e3d838	D0913	NYT_ENG_20050302.0156	5	460	displays	display	Texas	texas	Texas	UNKNOWN	5	YES	NO
RTE6-TEST	YES	6fecc49f-810d-4537-aadb-59b5e5b7fc14	D0913	NYT_ENG_20050302.0156	25	460	displays	display	Commandments	commandments	Commandments	UNKNOWN	24	NO	NO
RTE6-TEST	YES	86ff88bd-7fe1-461b-82be-b21a596ebbdc	D0913	NYT_ENG_20050302.0156	26	460	displays	display	Commandments	commandments	Commandments	UNKNOWN	24	NO	NO
RTE6-TEST	YES	4452d9c8-a1d4-4012-93c8-2ef88825d6e1	D0913	NYT_ENG_20050302.0164	15	460	displays	display	Commandments	commandments	Commandments	UNKNOWN	14	NO	NO
RTE6-TEST	YES	2b041566-4906-4f7b-ba0d-fa75969db411	D0913	NYT_ENG_20050302.0164	41	460	displays	display	Commandments	commandments	Commandments	UNKNOWN	42	YES	NO
RTE6-TEST	YES	ed2372f3-fb21-4dc3-8320-385d99a041b0	D0913	NYT_ENG_20050302.0164	41	460	displays	display	Texas	texas	Texas	UNKNOWN	41	YES	NO
RTE6-TEST	YES	f7dfb267-2015-4016-acd3-43ee80712107	D0913	AFP_ENG_20050302.0458	3	478	Amendment	amendment	Constitution	constitution	Constitution 's	UNKNOWN	3	YES	NO
RTE6-TEST	YES	7cf9aec4-4ea9-4488-b709-f03045935b1b	D0913	AFP_ENG_20050302.0458	3	478	Amendment	amendment	First	first	First	UNKNOWN	3	YES	NO
RTE6-TEST	YES	d34d6b9f-1ae3-4b83-8ace-9fd6f573611f	D0913	AFP_ENG_20050302.0577	4	478	Amendment	amendment	First	first	First	UNKNOWN	4	YES	NO
RTE6-TEST	YES	ca6d3441-592c-4ca3-8b69-8bdc8a8cbcf4	D0913	NYT_ENG_20050302.0169	17	481	brought	bring	Orden	orden	Thomas Van Orden	SUBJECT	17	YES	NO
RTE6-TEST	YES	24631d87-670c-410b-9dca-9895f91541db	D0913	AFP_ENG_20050302.0577	1	484	heard	hear	property	property	government property	OBJECT	2	YES	YES
RTE6-TEST	YES	a796945d-f82e-4465-9c42-5159b36c7239	D0913	AFP_ENG_20050302.0577	3	484	displays	display	Commandments	commandments	Commandments	UNKNOWN	1	YES	NO
RTE6-TEST	YES	fd3801ad-8054-4d5e-984b-d5ede41c12c8	D0913	NYT_ENG_20050302.0107	31	484	displays	display	Commandments	commandments	Commandments	UNKNOWN	36	NO	NO
RTE6-TEST	YES	a0c5c5f3-6b0c-49d8-bd99-e33090fae995	D0913	NYT_ENG_20050302.0156	3	484	displays	display	Commandments	commandments	Commandments	UNKNOWN	2	NO	NO
RTE6-TEST	YES	0ab95b84-27f0-40c3-83eb-cfcfbbc6756e	D0913	LTW_ENG_20050302.0134	31	513	depicted	depict	building	building	the Supreme Court building	OBJECT	29	YES	NO
RTE6-TEST	YES	02b61dc5-de3d-4e01-835b-926c39ddce4b	D0913	NYT_ENG_20050302.0107	36	513	depicted	depict	building	building	the Supreme Court building	OBJECT	35	YES	NO
RTE6-TEST	YES	4e11c116-f720-4e35-91da-037389d73500	D0913	NYT_ENG_20050302.0169	1	513	depicted	depict	building	building	the Supreme Court building	OBJECT	19	YES	NO
RTE6-TEST	YES	5c29388f-740d-4537-a00b-65998b1501e9	D0913	NYT_ENG_20050302.0169	35	513	depicted	depict	building	building	the Supreme Court building	OBJECT	28	YES	NO
RTE6-TEST	YES	a3b6fa3d-790c-4a9a-8fc6-8be330d03f10	D0918	NYT_ENG_20060204.0159	1	381	died	die	Friedan	friedan	Betty Friedan	SUBJECT	1	YES	NO
RTE6-TEST	YES	12730663-2671-469b-b987-b56a27017ea5	D0918	LTW_ENG_20060204.0020	1	382	died	die	85	85	85	OBJECT	0	YES	NO
RTE6-TEST	YES	ce9eb4c9-776f-4dc6-80e5-5701583ec38a	D0918	NYT_ENG_20060204.0159	1	382	died	die	Friedan	friedan	Betty Friedan	SUBJECT	1	YES	NO
RTE6-TEST	YES	6aeedfc9-89e7-4030-8b28-187f536c4e36	D0918	NYT_ENG_20060204.0159	1	382	died	die	85	85	85	OBJECT	0	YES	NO
RTE6-TEST	YES	9cb65217-6ef5-4162-ac6d-489d4fc1d7af	D0918	LTW_ENG_20060204.0020	73	391	published	publish	Mystique	mystique	`` The Feminine Mystique ''	OBJECT	75	NO	NO
RTE6-TEST	YES	20771357-c4dd-45c5-b6d3-0f25252fa8c9	D0918	LTW_ENG_20060204.0020	73	391	published	publish	1963	1963	1963	OBJECT	73	NO	NO
RTE6-TEST	YES	2d6e3a11-78cd-476b-bb07-96d70f7e6f18	D0928	APW_ENG_20041016.0064	4	493	trial	trial	Tyco	tyco	Tyco	UNKNOWN	2	YES	NO
RTE6-TEST	YES	06e8ccf9-ddfa-4414-955b-ae9339d50039	D0928	APW_ENG_20050114.1117	3	493	trial	trial	Tyco	tyco	Tyco	UNKNOWN	4	YES	NO
RTE6-TEST	YES	df9125a0-43f8-40ce-974e-f4759c1d14c6	D0928	APW_ENG_20050118.1133	8	493	trial	trial	Tyco	tyco	Tyco	UNKNOWN	9	YES	NO
RTE6-TEST	YES	173ff172-8d69-4fc1-af71-a29755465064	D0928	LTW_ENG_20050127.0006	5	493	trial	trial	Tyco	tyco	Tyco	UNKNOWN	1	YES	NO
RTE6-TEST	YES	79ee41a2-eb52-4967-ba0f-552996890154	D0928	LTW_ENG_20050127.0006	19	493	ended	end	trial	trial	The first Tyco trial	SUBJECT	19	YES	NO
RTE6-TEST	YES	4ed55603-a339-4343-ab17-9f05612487b3	D0928	LTW_ENG_20050127.0006	19	493	trial	trial	Tyco	tyco	Tyco	UNKNOWN	17	YES	NO
RTE6-TEST	YES	e989c35a-1943-45c6-86e2-d0f028616365	D0928	NYT_ENG_20050127.0254	15	493	trial	trial	Tyco	tyco	Tyco	UNKNOWN	1	YES	NO
RTE6-TEST	YES	38352a16-d993-41ff-9ecd-10567e521f61	D0928	APW_ENG_20050118.1133	3	496	trial	trial	Ltd.	ltd.	Tyco International Ltd.	UNKNOWN	1	YES	NO
RTE6-TEST	YES	f1b771bb-3a55-4e0c-903a-a7da7922d148	D0928	LTW_ENG_20050127.0006	7	499	received	receive	juror	juror	A juror	SUBJECT	6	YES	YES
RTE6-TEST	YES	cf8034a3-25fd-4229-8f10-a2e98b5a56a5	D0928	NYT_ENG_20050118.0105	14	499	received	receive	juror	juror	A juror	SUBJECT	14	YES	NO
RTE6-TEST	YES	04af12ff-984c-4f58-9888-b732e47c4703	D0928	APW_ENG_20050118.1133	13	502	makes	make	Ltd.	ltd.	Tyco International Ltd.	SUBJECT	1	YES	YES
RTE6-TEST	YES	7260a9a6-f8b7-4077-8b0a-bd14b3505a30	D0928	NYT_ENG_20050118.0105	15	510	charged	charge	fraud	fraud	securities fraud	OBJECT	18	NO	NO
RTE6-TEST	YES	c938239b-c0ed-4fbb-b858-d513802fff8d	D0928	APW_ENG_20050114.1117	12	511	charged	charge	records	record	falsifying business records	OBJECT	12	YES	NO
RTE6-TEST	YES	07220b70-3f3d-4e6c-b145-819f91714c9f	D0928	APW_ENG_20050118.1133	6	511	charged	charge	records	record	falsifying business records	OBJECT	6	YES	NO
RTE6-TEST	YES	0e0a5f7f-0545-4d82-8741-c505541d8595	D0928	NYT_ENG_20050118.0105	15	511	charged	charge	records	record	falsifying business records	OBJECT	24	NO	NO
RTE6-TEST	YES	b5b36753-85bd-4839-9401-05d63a0b1f99	D0928	APW_ENG_20041102.0036	11	539	based	base	Ltd.	ltd.	Tyco International Ltd.	OBJECT	1	YES	YES
RTE6-TEST	YES	91b7dbcd-433c-4901-97cd-6f8b57de336c	D0928	APW_ENG_20050118.1133	14	539	based	base	Ltd.	ltd.	Tyco International Ltd.	OBJECT	1	YES	YES
RTE6-TEST	YES	97d9cc12-5c31-4dd0-85dc-8528fdc4dcc2	D0928	APW_ENG_20041016.0064	3	579	charged	charge	Kozlowski	kozlowski	L. Dennis Kozlowski	OBJECT	3	YES	NO
RTE6-TEST	YES	0ac644da-5631-46fb-9734-9b6e48953a04	D0928	APW_ENG_20041102.0036	10	579	charged	charge	Kozlowski	kozlowski	L. Dennis Kozlowski	OBJECT	10	YES	NO
RTE6-TEST	YES	e02f6120-84ef-4ec5-a92c-39ad45ce15ba	D0928	APW_ENG_20050114.1117	17	579	charged	charge	Kozlowski	kozlowski	L. Dennis Kozlowski	OBJECT	16	YES	YES
RTE6-TEST	YES	7e54749a-e8a1-4af9-9b95-99240ec822f4	D0928	APW_ENG_20050114.1117	17	579	charged	charge	larceny	larceny	larceny	OBJECT	17	YES	NO
RTE6-TEST	YES	e2a0af13-c892-47c6-a752-2998cb1b8932	D0928	NYT_ENG_20050115.0080	3	579	charged	charge	Kozlowski	kozlowski	L. Dennis Kozlowski	OBJECT	3	YES	NO
RTE6-TEST	YES	779945d5-ebf4-4443-979c-3572057d9bf6	D0928	NYT_ENG_20050115.0080	3	579	charged	charge	larceny	larceny	larceny	OBJECT	17	YES	NO
RTE6-TEST	YES	a5b037e4-33a8-4a6a-8966-8b00db2f5440	D0928	NYT_ENG_20050115.0080	8	579	charged	charge	Kozlowski	kozlowski	L. Dennis Kozlowski	OBJECT	8	YES	YES
RTE6-TEST	YES	c0d0b393-e3d7-487b-8879-05ff1173efae	D0928	NYT_ENG_20050115.0080	8	579	charged	charge	larceny	larceny	larceny	OBJECT	17	YES	NO
RTE6-TEST	YES	ba368b54-2eb5-481b-bc4f-8d67ea43db36	D0928	APW_ENG_20041016.0064	3	581	charged	charge	Swartz	swartz	Mark H. Swartz	OBJECT	3	YES	NO
RTE6-TEST	YES	05e4fb83-16d7-4241-a8e4-d2b23f92adc4	D0928	APW_ENG_20041102.0036	10	581	charged	charge	Swartz	swartz	Mark H. Swartz	OBJECT	10	YES	NO
RTE6-TEST	YES	22685936-5a9f-4a8b-b65a-6a7974bfb201	D0928	APW_ENG_20050114.1117	17	581	charged	charge	Swartz	swartz	Mark H. Swartz	OBJECT	16	YES	YES
RTE6-TEST	YES	27267d42-cc6e-4fef-a86a-1b234960b1b8	D0928	APW_ENG_20050114.1117	17	581	charged	charge	larceny	larceny	larceny	OBJECT	17	YES	NO
RTE6-TEST	YES	35a2fc01-53dc-4c3b-a2f6-0aff95ca3976	D0928	APW_ENG_20041102.0036	9	584	looted	loot	Ltd.	ltd.	Tyco International Ltd.	OBJECT	1	YES	YES
RTE6-TEST	YES	b376e9bc-6d10-4dc2-93e5-74a7230cd4a8	D0928	APW_ENG_20050118.1133	0	584	looted	loot	Ltd.	ltd.	Tyco International Ltd.	OBJECT	1	YES	YES
RTE6-TEST	YES	dd0bc1bc-48c8-4301-a969-703f2035cf32	D0928	APW_ENG_20050118.1133	1	584	looted	loot	Ltd.	ltd.	Tyco International Ltd.	OBJECT	1	YES	YES
RTE6-TEST	YES	1cd8835e-979a-464b-ab11-4a8eaf2510fe	D0928	APW_ENG_20050118.1133	4	584	looted	loot	Ltd.	ltd.	Tyco International Ltd.	OBJECT	1	YES	YES
RTE6-TEST	YES	6f3723c7-2a15-43bf-8fa2-5a380f752dcd	D0928	APW_ENG_20041102.0036	9	585	looted	loot	Ltd.	ltd.	Tyco International Ltd.	OBJECT	1	YES	YES
RTE6-TEST	YES	ae99a6b3-9b86-4e65-ace3-79155728905b	D0928	APW_ENG_20050118.1133	0	585	looted	loot	Ltd.	ltd.	Tyco International Ltd.	OBJECT	1	YES	YES
RTE6-TEST	YES	cbdadadf-67bc-48ba-a7e5-c68bbc94685c	D0928	APW_ENG_20050118.1133	1	585	looted	loot	Ltd.	ltd.	Tyco International Ltd.	OBJECT	1	YES	YES
RTE6-TEST	YES	dfbda85d-3e1c-4cdd-bf01-e61d0e3a7b9e	D0928	APW_ENG_20050118.1133	4	585	looted	loot	Ltd.	ltd.	Tyco International Ltd.	OBJECT	1	YES	YES
RTE6-TEST	YES	6d53f5ef-2a8e-422c-9af6-090a66234b87	D0931	NYT_ENG_20050107.0350	4	641	transfers	transfer	technology	technology	nuclear technology	UNKNOWN	26	YES	YES
RTE6-TEST	YES	9bbabc23-fc96-4fc1-a6f8-d9e53b56ca56	D0931	NYT_ENG_20050107.0350	4	642	transfers	transfer	technology	technology	nuclear technology	UNKNOWN	26	YES	YES
RTE6-TEST	YES	8e756563-d439-4e46-95bc-aa7e265a6638	D0931	NYT_ENG_20050107.0350	4	643	transfers	transfer	technology	technology	nuclear technology	UNKNOWN	26	YES	YES
RTE6-TEST	YES	f0dd78e0-ebb8-46cd-b918-46589d8edae4	D0931	AFP_ENG_20050117.0292	8	657	pardoned	pardon	Khan	khan	Abdul Qadeer Khan	OBJECT	7	YES	YES
RTE6-TEST	YES	492fd842-8dc8-4591-9647-41ef81e58bc3	D0931	APW_ENG_20041128.0012	13	657	pardoned	pardon	Khan	khan	Abdul Qadeer Khan	OBJECT	12	YES	YES
RTE6-TEST	YES	3a7e80f9-d22c-49ca-a6ab-8e6f8e12deb4	D0931	NYT_ENG_20041225.0036	107	657	pardoned	pardon	Khan	khan	Abdul Qadeer Khan	OBJECT	107	YES	YES
RTE6-TEST	YES	114a0173-f373-40b7-a9e3-38bc46b124d6	D0931	NYT_ENG_20050107.0350	33	657	pardoned	pardon	Musharraf	musharraf	Pervez Musharraf	SUBJECT	32	YES	YES
RTE6-TEST	YES	211e62e8-6a6d-48e7-9e3e-040067280572	D0936	AFP_ENG_20050701.0385	1	325	retired	retire	O'Connor	o'connor	Sandra Day O'Connor	SUBJECT	1	YES	YES
RTE6-TEST	YES	6267339b-3b92-444c-8b78-0c330f12fffe	D0936	AFP_ENG_20050701.0385	1	325	retired	retire	Court	court	the Supreme Court	OBJECT	1	YES	NO
RTE6-TEST	YES	b23a7418-4126-42cc-b12a-c1cbbd888b5f	D0936	AFP_ENG_20050701.0385	2	325	retired	retire	O'Connor	o'connor	Sandra Day O'Connor	SUBJECT	1	YES	YES
RTE6-TEST	YES	e8e23337-f74d-488d-bca8-1d456cebfd30	D0936	AFP_ENG_20050701.0385	2	325	retired	retire	Court	court	the Supreme Court	OBJECT	2	YES	NO
RTE6-TEST	YES	780a2b1d-12ab-4b10-9257-e7e529d9c3c8	D0936	AFP_ENG_20050701.0385	5	325	retired	retire	O'Connor	o'connor	Sandra Day O'Connor	SUBJECT	4	YES	YES
RTE6-TEST	YES	2a31b492-2668-4dca-9211-7785356a565c	D0936	AFP_ENG_20050701.0385	5	325	retired	retire	Court	court	the Supreme Court	OBJECT	5	YES	NO
RTE6-TEST	YES	0f475353-b122-4907-b2bd-e9326df3befc	D0936	AFP_ENG_20050701.0415	2	325	retired	retire	O'Connor	o'connor	Sandra Day O'Connor	SUBJECT	2	YES	YES
RTE6-TEST	YES	8742ac24-b107-4771-bf06-89fe0b5a5fcd	D0936	AFP_ENG_20050701.0415	2	325	retired	retire	Court	court	the Supreme Court	OBJECT	1	YES	NO
RTE6-TEST	YES	54b508db-1cf2-42b8-8707-3190ab1b83df	D0936	AFP_ENG_20050701.0624	1	325	retired	retire	O'Connor	o'connor	Sandra Day O'Connor	SUBJECT	1	YES	YES
RTE6-TEST	YES	147307d7-0248-4d8d-ae3b-1cd908c9afbf	D0936	AFP_ENG_20050701.0624	1	325	retired	retire	Court	court	the Supreme Court	OBJECT	1	YES	NO
RTE6-TEST	YES	599205ff-a2f0-40b3-b284-6b787eb0180c	D0936	AFP_ENG_20050701.0624	20	325	retired	retire	Court	court	the Supreme Court	OBJECT	20	YES	NO
RTE6-TEST	YES	f9d2be55-735b-441e-90a3-826c8aff2194	D0936	AFP_ENG_20050702.0028	1	325	retired	retire	O'Connor	o'connor	Sandra Day O'Connor	SUBJECT	1	YES	YES
RTE6-TEST	YES	962af352-e34c-4463-9ada-7a174ba70be2	D0936	AFP_ENG_20050702.0028	1	325	retired	retire	Court	court	the Supreme Court	OBJECT	1	YES	NO
RTE6-TEST	YES	0febfe68-7688-4b91-b0bc-917e258d7a19	D0936	AFP_ENG_20050702.0028	22	325	retired	retire	Court	court	the Supreme Court	OBJECT	22	YES	NO
RTE6-TEST	YES	127b4db4-741c-4780-a99d-72736f11d2c9	D0936	AFP_ENG_20050706.0021	3	325	retired	retire	Court	court	the Supreme Court	OBJECT	3	YES	NO
RTE6-TEST	YES	b8893ed8-d03e-4265-8584-8f5a6782ccfe	D0936	AFP_ENG_20050706.0254	4	325	retired	retire	O'Connor	o'connor	Sandra Day O'Connor	SUBJECT	4	YES	YES
RTE6-TEST	YES	6db485bf-21c7-4d98-9e2e-76aac5f02133	D0936	AFP_ENG_20050706.0254	4	325	retired	retire	Court	court	the Supreme Court	OBJECT	4	YES	NO
RTE6-TEST	YES	dd094629-294c-4ee4-914c-5659a5fce0d1	D0936	APW_ENG_20050709.0647	9	325	retired	retire	O'Connor	o'connor	Sandra Day O'Connor	SUBJECT	9	YES	YES
RTE6-TEST	YES	164ae2b5-b977-480a-ad07-53a462ff0ff6	D0936	APW_ENG_20050709.0647	9	325	retired	retire	Court	court	the Supreme Court	OBJECT	9	YES	NO
RTE6-TEST	YES	eb915d0c-1d6e-4836-a37a-3c2aa0c20544	D0936	XIN_ENG_20050701.0185	0	325	retired	retire	O'Connor	o'connor	Sandra Day O'Connor	SUBJECT	0	YES	NO
RTE6-TEST	YES	cbabc124-30c6-4ea2-aaf0-aa08fbe067c4	D0936	XIN_ENG_20050701.0185	0	325	retired	retire	Court	court	the Supreme Court	OBJECT	0	YES	NO
RTE6-TEST	YES	5fbe2b62-f257-4f06-b0e1-80bce8b2e453	D0936	XIN_ENG_20050701.0185	1	325	retired	retire	O'Connor	o'connor	Sandra Day O'Connor	SUBJECT	1	YES	YES
RTE6-TEST	YES	a58e970f-57c8-46d6-89ba-302dd2c81829	D0936	XIN_ENG_20050701.0185	1	325	retired	retire	Court	court	the Supreme Court	OBJECT	1	YES	NO
RTE6-TEST	YES	c1994b64-8840-487b-b9fe-3b7ef8250a0a	D0936	XIN_ENG_20050701.0185	2	325	retired	retire	O'Connor	o'connor	Sandra Day O'Connor	SUBJECT	1	YES	NO
RTE6-TEST	YES	71f84c45-1dbc-49aa-b89a-bbae5bba9bf7	D0936	AFP_ENG_20050701.0385	4	327	took	take	O'Connor	o'connor	Sandra Day O'Connor	SUBJECT	4	YES	YES
RTE6-TEST	YES	774a81b1-b6e0-4e71-85e0-565ed1ce6a05	D0936	AFP_ENG_20050701.0385	4	327	took	take	Court	court	the Supreme Court	OBJECT	4	YES	NO
RTE6-TEST	YES	a670ca9b-5a70-421f-b62d-5eed2ea1cd75	D0936	AFP_ENG_20050701.0624	17	327	took	take	O'Connor	o'connor	Sandra Day O'Connor	SUBJECT	17	YES	YES
RTE6-TEST	YES	4d4efc35-69aa-4735-8017-15457e8e36b9	D0936	AFP_ENG_20050701.0624	17	327	took	take	Court	court	the Supreme Court	OBJECT	18	YES	NO
RTE6-TEST	YES	16f53d58-bd6e-46cc-8e17-02bb07508402	D0936	AFP_ENG_20050702.0028	19	327	took	take	O'Connor	o'connor	Sandra Day O'Connor	SUBJECT	19	YES	YES
RTE6-TEST	YES	7198ce34-ad33-44f1-9966-fa59f0a2248b	D0936	AFP_ENG_20050702.0028	19	327	took	take	Court	court	the Supreme Court	OBJECT	20	YES	NO
RTE6-TEST	YES	6f17df7f-763d-4ec2-8e1e-2f26285ae084	D0936	AFP_ENG_20050701.0385	2	331	chance	chance	Bush	bush	Bush 's	UNKNOWN	2	YES	NO
RTE6-TEST	YES	ce797e71-e572-4ce4-b4cd-2ec69816bb4d	D0936	AFP_ENG_20050701.0385	5	331	chance	chance	Bush	bush	Bush 's	UNKNOWN	5	YES	NO
RTE6-TEST	YES	ea231d43-53a1-4cbf-a7ae-8073e5c6603a	D0936	AFP_ENG_20050701.0624	2	331	chance	chance	Bush	bush	Bush 's	UNKNOWN	2	YES	NO
RTE6-TEST	YES	0ccbf4c1-5dd0-4f12-a650-06611bbb8593	D0936	AFP_ENG_20050702.0028	2	331	chance	chance	Bush	bush	Bush 's	UNKNOWN	2	YES	NO
RTE6-TEST	YES	11670796-48f8-4f75-ab9a-24837d4d2091	D0936	AFP_ENG_20050706.0254	5	331	chance	chance	Bush	bush	Bush 's	UNKNOWN	5	YES	NO
RTE6-TEST	YES	4a061ec8-d2d3-4a08-a970-04367ac23411	D0936	XIN_ENG_20050701.0185	5	343	opened	open	vacancy	vacancy	the first vacancy	OBJECT	7	YES	NO
RTE6-TEST	YES	981ba647-4738-4a9d-8cda-e37861ca25b3	D0936	XIN_ENG_20050701.0185	5	343	opened	open	years	years	11 years	OBJECT	5	YES	NO
RTE6-TEST	YES	e4b7db4a-46ed-417b-ab99-378426517233	D0939	LTW_ENG_20050126.0117	12	346	wreck	wreck	train	train	train	UNKNOWN	15	YES	NO
RTE6-TEST	YES	51824ce5-78a9-4237-b0df-730e7ec68c84	D0939	NYT_ENG_20050126.0234	1	346	wreck	wreck	train	train	train	UNKNOWN	1	YES	NO
RTE6-TEST	YES	31ed79d3-8366-403d-bbdb-ed5e445a0fd8	D0939	NYT_ENG_20050126.0234	1	348	wreck	wreck	train	train	train	UNKNOWN	1	YES	NO
RTE6-TEST	YES	ea9123ff-a6cb-42b4-8732-a2f4b529b9d8	D0939	LTW_ENG_20050126.0117	3	349	wreck	wreck	Glendale	glendale	Glendale	UNKNOWN	12	YES	NO
RTE6-TEST	YES	0bb96ad7-cded-4a89-bf46-38c906a2a43f	D0939	NYT_ENG_20050126.0303	26	350	parked	park	man	man	A man	SUBJECT	24	NO	NO
RTE6-TEST	YES	5f285c92-cb6b-447a-ad38-df837387b307	D0939	NYT_ENG_20050126.0303	26	350	parked	park	vehicle	vehicle	his vehicle on a rail line	OBJECT	27	YES	YES
RTE6-TEST	YES	53c3dfd4-f068-4fa9-8842-18618b5003a7	D0939	XIN_ENG_20050126.0287	2	350	parked	park	man	man	A man	SUBJECT	1	YES	YES
RTE6-TEST	YES	c65086a5-c028-42f5-b2f7-a92dcab3241c	D0939	XIN_ENG_20050126.0287	2	350	parked	park	vehicle	vehicle	his vehicle on a rail line	OBJECT	5	YES	YES
RTE6-TEST	YES	da048b7d-a022-4e0f-bd62-4c7f3ba3f78c	D0939	LTW_ENG_20050126.0115	1	351	collision	collision	trains	train	trains	SUBJECT	1	YES	NO
RTE6-TEST	YES	ad33b55a-f924-450d-90c4-1f4ffe09e6af	D0939	LTW_ENG_20050126.0115	16	351	causing	cause	collision	collision	a collision of trains	OBJECT	1	YES	NO
RTE6-TEST	YES	c04ba175-2200-4b44-b1bd-8396f4239002	D0939	NYT_ENG_20050126.0234	1	351	causing	cause	collision	collision	a collision of trains	OBJECT	2	YES	YES
RTE6-TEST	YES	958a042a-fa6b-4fde-bec9-dab27d5c58a1	D0939	NYT_ENG_20050126.0234	17	351	causing	cause	collision	collision	a collision of trains	OBJECT	31	YES	NO
RTE6-TEST	YES	81538c92-f32a-4da2-8e4a-9a2272a19516	D0939	NYT_ENG_20050127.0003	1	351	collision	collision	trains	train	trains	SUBJECT	1	YES	NO
RTE6-TEST	YES	3ed64a88-5aee-49de-9ab0-3174578d7077	D0939	NYT_ENG_20050127.0214	1	351	causing	cause	collision	collision	a collision of trains	OBJECT	29	YES	YES
RTE6-TEST	YES	1dc0af8c-c393-4d96-a1ef-e9e60bdb3658	D0939	XIN_ENG_20050126.0287	9	351	accused	accuse	man	man	A man	OBJECT	1	YES	YES
RTE6-TEST	YES	1b3f433f-1a03-4327-8297-c101501f46a1	D0939	XIN_ENG_20050126.0287	9	351	causing	cause	collision	collision	a collision of trains	OBJECT	2	YES	NO
RTE6-TEST	YES	4018139d-55ff-4c22-bc67-fa8df60f195c	D0939	LTW_ENG_20050126.0115	11	352	charged	charge	man	man	The man	OBJECT	2	YES	NO
RTE6-TEST	YES	3b7203d0-0fcc-4a8c-a6e6-2fd9ad26ef81	D0939	LTW_ENG_20050126.0115	11	352	charged	charge	murder	murder	murder	OBJECT	11	YES	NO
RTE6-TEST	YES	fdbcd4e4-b586-4edc-80f8-f399ceee8ccc	D0939	NYT_ENG_20050126.0234	13	352	charged	charge	man	man	The man	OBJECT	3	YES	YES
RTE6-TEST	YES	c6c49482-216b-491c-a275-8ef1605e90d0	D0939	NYT_ENG_20050127.0214	1	352	causing	cause	wreck	wreck	the train wreck	OBJECT	1	YES	NO
RTE6-TEST	YES	91a4dc44-de27-4da4-9cdb-512237dda20d	D0939	NYT_ENG_20050127.0214	1	352	wreck	wreck	train	train	train	UNKNOWN	0	YES	NO
RTE6-TEST	YES	02f7570b-58a2-40b7-bcc8-7682e9b50e49	D0939	NYT_ENG_20050126.0234	1	354	wreck	wreck	train	train	train	UNKNOWN	1	YES	NO
RTE6-TEST	YES	2bcc356a-6f97-4a91-a239-d6c846dd71e2	D0939	NYT_ENG_20050127.0214	1	354	causing	cause	wreck	wreck	the train wreck	OBJECT	1	YES	NO
RTE6-TEST	YES	add0f60f-930a-43d1-ab00-25db4f51f49e	D0939	NYT_ENG_20050127.0214	1	354	wreck	wreck	train	train	train	UNKNOWN	0	YES	NO
RTE6-TEST	YES	261bb313-3fba-4e93-8481-90d4ababd645	D0939	NYT_ENG_20050127.0350	8	355	crash	crash	train	train	train	UNKNOWN	12	YES	NO
RTE6-TEST	YES	e4d83465-f317-42e0-83a8-714fc140886c	D0939	LTW_ENG_20050126.0115	1	356	injured	injure	crash	crash	The train crash	SUBJECT	2	YES	NO
RTE6-TEST	YES	3a10c1d8-175c-4fc1-a1cc-1ed5903cebcc	D0939	LTW_ENG_20050126.0115	1	356	injured	injure	people	people	nearly 200 people	OBJECT	1	YES	NO
RTE6-TEST	YES	57d7fa28-7b62-4495-8d6d-9ec57f881f8d	D0939	LTW_ENG_20050126.0117	1	356	crash	crash	train	train	train	UNKNOWN	1	YES	NO
RTE6-TEST	YES	111f211f-4df0-449e-a626-7c6bbbbc5bdc	D0939	NYT_ENG_20050126.0303	3	356	injured	injure	people	people	nearly 200 people	OBJECT	3	YES	NO
RTE6-TEST	YES	f2920b9a-ba25-4340-980c-13f16e02c823	D0939	NYT_ENG_20050127.0214	7	356	injured	injure	crash	crash	The train crash	SUBJECT	13	YES	NO
RTE6-TEST	YES	296c7e74-52ef-4904-9bfb-588f97f4b1fe	D0939	NYT_ENG_20050127.0350	8	356	injured	injure	people	people	nearly 200 people	OBJECT	8	YES	NO
RTE6-TEST	YES	eb6ccad7-9e1c-499a-8f91-17704ce6f2b9	D0939	NYT_ENG_20050127.0350	8	356	crash	crash	train	train	train	UNKNOWN	12	YES	NO
RTE6-TEST	YES	0f638796-9933-4f0c-b570-5e9c995a8c3b	D0939	NYT_ENG_20050127.0214	5	373	decided	decide	yet	yet	yet	MODIFIER	8	NO	NO
RTE6-TEST	YES	4d7ac378-4b03-45b7-a669-fec7011e1bc0	D0939	NYT_ENG_20050126.0303	18	375	obtained	obtain	wife	wife	Alvarez ' estranged wife	SUBJECT	17	YES	YES
RTE6-TEST	YES	8c238b37-9584-4583-8bf5-795914691bb3	D0939	LTW_ENG_20050126.0117	16	378	wreck	wreck	Glendale	glendale	Glendale	UNKNOWN	17	YES	NO
RTE6-TEST	YES	be3999c0-e6ca-4897-bc64-c8c5aa892fe6	D0943	AFP_ENG_20041205.0062	24	520	bombing	bombing	India	india	Air India	UNKNOWN	24	YES	NO
RTE6-TEST	YES	a5c7f2b6-9b92-4298-92fc-181df62e4710	D0943	NYT_ENG_20041102.0198	7	520	bombing	bombing	India	india	Air India	UNKNOWN	7	YES	NO
RTE6-TEST	YES	e73745ff-b32e-4f86-9d8f-54502ad432ab	D0943	AFP_ENG_20041205.0062	5	521	Flight	flight	India	india	Air India	SUBJECT	5	YES	NO
RTE6-TEST	YES	4f1bac88-a4fd-40fa-bc30-fb8cc9661bb5	D0943	APW_ENG_20041204.0008	6	521	Flight	flight	India	india	Air India	SUBJECT	1	YES	NO
RTE6-TEST	YES	3d80a6cb-651b-4c09-86d1-c7ae9435a157	D0943	APW_ENG_20041204.0008	6	522	killed	kill	bombings	bombing	the bombings of an Air India plane	OBJECT	2	NO	NO
RTE6-TEST	YES	3fe0689c-7105-4ad4-b23d-8ec2e511c017	D0943	AFP_ENG_20041101.0711	8	523	killed	kill	bombing	bombing	The Air India bombing	SUBJECT	9	YES	YES
RTE6-TEST	YES	a2777689-becb-40b9-82b6-057eb670927e	D0943	AFP_ENG_20041101.0711	8	523	killed	kill	people	people	329 people	OBJECT	9	YES	YES
RTE6-TEST	YES	e3ed4aac-cac7-43a1-aa3e-c5294f8d265e	D0943	AFP_ENG_20041204.0020	6	523	killed	kill	bombing	bombing	The Air India bombing	SUBJECT	4	YES	NO
RTE6-TEST	YES	58ba4c6d-6f04-43ae-babc-37120793d816	D0943	AFP_ENG_20041205.0062	5	523	killed	kill	bombing	bombing	The Air India bombing	SUBJECT	1	YES	NO
RTE6-TEST	YES	f197e0ee-7e6b-49b6-858b-0bdf43d2df8b	D0943	AFP_ENG_20041205.0062	5	523	killed	kill	people	people	329 people	OBJECT	1	YES	YES
RTE6-TEST	YES	a4046141-63d0-497f-808b-e0bb5e35013d	D0943	AFP_ENG_20041205.0062	15	523	killed	kill	bombing	bombing	The Air India bombing	SUBJECT	12	YES	NO
RTE6-TEST	YES	ac258288-e377-4df8-9742-a7117d5d84c3	D0943	AFP_ENG_20041205.0062	15	523	killed	kill	people	people	329 people	OBJECT	26	NO	NO
RTE6-TEST	YES	31834a51-867d-4a01-859d-db1e6720c8a9	D0943	APW_ENG_20041019.0465	1	523	killed	kill	bombing	bombing	The Air India bombing	SUBJECT	1	YES	NO
RTE6-TEST	YES	c94b3a4c-3f96-44d0-bca2-2bd50ce36b9c	D0943	APW_ENG_20041019.0465	1	523	bombing	bombing	India	india	Air India	UNKNOWN	1	YES	NO
RTE6-TEST	YES	d3686162-758f-424d-a285-9c6e9b845b33	D0943	APW_ENG_20041204.0008	6	523	killed	kill	bombing	bombing	The Air India bombing	SUBJECT	2	NO	NO
RTE6-TEST	YES	1903c8c2-1069-44b1-b17e-071a9c9c69e4	D0943	NYT_ENG_20041102.0198	1	523	killed	kill	bombing	bombing	The Air India bombing	SUBJECT	5	YES	NO
RTE6-TEST	YES	258268d0-3f7d-4822-bf8a-cd20472f21ca	D0943	AFP_ENG_20041019.0488	1	524	accused	accuse	men	man	Two Sikh men	OBJECT	4	YES	YES
RTE6-TEST	YES	557fc869-030e-44cc-b477-dc9d0a966a23	D0943	AFP_ENG_20041019.0488	5	527	exploded	explode	bomb	bomb	A bomb	SUBJECT	6	YES	NO
RTE6-TEST	YES	075c7a50-9750-46e4-b32f-be4ad7bc6059	D0943	APW_ENG_20041204.0008	6	527	exploded	explode	airport	airport	Narita airport	OBJECT	6	YES	NO
RTE6-TEST	YES	ec9b30c9-b399-4040-9677-2d9d99b9f2cc	D0943	NYT_ENG_20041102.0198	8	527	exploded	explode	bomb	bomb	A bomb	SUBJECT	9	YES	NO
RTE6-TEST	YES	d499722a-9ba9-4552-b4f3-b341c701e687	D0943	NYT_ENG_20041102.0198	8	527	exploded	explode	airport	airport	Narita airport	OBJECT	8	YES	NO
RTE6-TEST	YES	6f78ad57-eda4-424e-bc8e-1954a83d8aeb	D0943	AFP_ENG_20041019.0488	5	528	exploded	explode	bomb	bomb	A bomb	SUBJECT	6	YES	NO
RTE6-TEST	YES	3f68502f-df29-453b-9157-130f73be550e	D0943	AFP_ENG_20041101.0711	7	528	killing	kill	handlers	handler	two baggage handlers	OBJECT	7	YES	NO
RTE6-TEST	YES	3d0461f5-39bc-4694-9e13-2a2c15b75cfb	D0943	NYT_ENG_20041102.0198	8	528	exploded	explode	bomb	bomb	A bomb	SUBJECT	9	YES	NO
RTE6-TEST	YES	d420a2ed-9076-4f51-aeda-0310fcf0fa56	D0943	AFP_ENG_20041019.0488	5	529	transferring	transfer	suitcases	suitcase	suitcases to an Air India Flight	OBJECT	5	YES	YES
RTE6-TEST	YES	9feca679-f810-47e8-ae33-67c64c01f5bd	D0943	AFP_ENG_20041101.0711	7	529	killed	kill	handlers	handler	Two baggage handlers	OBJECT	7	YES	NO
RTE6-TEST	YES	7622cd09-30f0-4fe3-8f60-6ca700bf7086	D0943	AFP_ENG_20041101.0711	7	529	transferring	transfer	suitcases	suitcase	suitcases to an Air India Flight	OBJECT	5	YES	YES
RTE6-TEST	YES	c70633c7-7a3f-4fee-a40c-d3e99e1f432b	D0943	AFP_ENG_20041204.0020	5	529	transferring	transfer	suitcases	suitcase	suitcases to an Air India Flight	OBJECT	5	YES	YES
RTE6-TEST	YES	ff375678-34ad-4618-8aa6-5f846765f268	D0943	AFP_ENG_20041205.0062	14	529	transferring	transfer	suitcases	suitcase	suitcases to an Air India Flight	OBJECT	13	YES	YES
RTE6-TEST	YES	1af23065-fde0-4537-9dfa-1c97f8ce4154	D0943	AFP_ENG_20041019.0488	4	535	immigrated	immigrate	Malik	malik	Ripudaman Singh Malik	SUBJECT	2	YES	YES
RTE6-TEST	YES	0cae7e9b-ff9a-4a13-94ca-fc74e65f011a	D0943	AFP_ENG_20041205.0062	8	535	immigrated	immigrate	Malik	malik	Ripudaman Singh Malik	SUBJECT	7	YES	YES
RTE6-TEST	YES	60779c35-c992-4511-a21d-f3e11684932a	D0943	AFP_ENG_20041205.0062	8	535	immigrated	immigrate	to	to	to Canada	MODIFIER	11	NO	NO
RTE6-TEST	YES	8aa8a742-7276-433e-9dde-a78b34947567	D0943	AFP_ENG_20041019.0488	4	625	immigrated	immigrate	Bagri	bagri	Ajaib Singh Bagri	SUBJECT	3	YES	YES
RTE6-TEST	YES	4f4465e2-1271-4941-b4df-10341078b9be	D0943	AFP_ENG_20041205.0062	8	625	immigrated	immigrate	Bagri	bagri	Ajaib Singh Bagri	SUBJECT	7	YES	YES
RTE6-TEST	YES	6f87cfeb-8366-4aa4-bd81-cef239a1dad8	D0943	AFP_ENG_20041205.0062	8	625	immigrated	immigrate	to	to	to Canada	MODIFIER	11	NO	NO
RTE6-TEST	NO	a717fdae-72ee-4324-9544-35a789692f8f	D0901	AFP_ENG_20050312.0019	1	592	service	service	bus	bus	bus	UNKNOWN	1	YES	NO
RTE6-TEST	NO	4508c27c-bf09-463b-8bcd-e79438103678	D0901	APW_ENG_20041118.0081	18	592	start	start	service	service	a bus service	OBJECT	18	NO	NO
RTE6-TEST	NO	49ef0700-a6e8-44de-9cf5-d2e62273504d	D0901	APW_ENG_20041118.0081	18	592	start	start	India	india	India and Pakistan	SUBJECT	16	NO	NO
RTE6-TEST	NO	33d024d1-4c0b-41ec-8dc6-98794485a1ab	D0901	APW_ENG_20041119.0095	11	592	start	start	India	india	India and Pakistan	SUBJECT	11	YES	NO
RTE6-TEST	NO	81c99afe-19b8-4eeb-9e57-c48c06a83ddb	D0901	LTW_ENG_20041118.0101	13	592	agreed	agree	India	india	India and Pakistan	SUBJECT	13	NO	NO
RTE6-TEST	NO	72ceecd1-337d-4f7b-81b5-8612f3917337	D0901	LTW_ENG_20041123.0130	4	592	agreed	agree	India	india	India and Pakistan	SUBJECT	5	NO	NO
RTE6-TEST	NO	6f92be9e-14d8-4010-9350-d491d091e12a	D0901	XIN_ENG_20041113.0001	20	592	agreed	agree	India	india	India and Pakistan	SUBJECT	20	YES	NO
RTE6-TEST	NO	108e5f27-e9b0-4626-bcee-d60e9f6532d7	D0901	AFP_ENG_20050312.0019	1	593	service	service	bus	bus	bus	UNKNOWN	1	YES	NO
RTE6-TEST	NO	64cb0f53-2eee-46e3-bcdd-8280f0105c0e	D0901	AFP_ENG_20050312.0019	5	593	agreed	agree	service	service	the bus service	OBJECT	4	NO	NO
RTE6-TEST	NO	98c73db2-0ca8-4032-9cb0-a06ac5cd4194	D0901	AFP_ENG_20050312.0019	11	593	link	link	Kashmir	kashmir	divided Kashmir	OBJECT	9	YES	YES
RTE6-TEST	NO	db91efcd-ec44-4afe-9cd0-430da4ba766b	D0901	AFP_ENG_20050312.0019	11	593	link	link	India	india	India and Pakistan	SUBJECT	9	NO	NO
RTE6-TEST	NO	722ac2c7-9213-43c6-b71a-9bc8b8960df2	D0901	LTW_ENG_20041118.0101	13	593	agreed	agree	India	india	India and Pakistan	SUBJECT	13	NO	NO
RTE6-TEST	NO	31d0bfea-d3ff-470f-98e3-1a37b060c31e	D0901	LTW_ENG_20041123.0130	4	593	agreed	agree	India	india	India and Pakistan	SUBJECT	5	NO	NO
RTE6-TEST	NO	6b115166-268c-421b-b3ec-137c33819771	D0901	LTW_ENG_20041123.0130	4	593	agreed	agree	service	service	the bus service	OBJECT	4	YES	NO
RTE6-TEST	NO	cc90c394-97de-498a-87be-e80864c6d6a1	D0901	XIN_ENG_20041113.0001	20	593	agreed	agree	India	india	India and Pakistan	SUBJECT	20	YES	NO
RTE6-TEST	NO	c3423f39-b626-4a90-af75-aac638e21e07	D0901	AFP_ENG_20050312.0019	1	594	service	service	bus	bus	bus	UNKNOWN	1	YES	NO
RTE6-TEST	NO	bf267567-b717-4687-9fde-63e4ef9d94e5	D0901	APW_ENG_20050408.0034	10	594	runs	run	Srinagar	srinagar	Srinagar and Muzaffarabad	OBJECT	7	YES	NO
RTE6-TEST	NO	7ddaaf61-8564-469a-a10f-623ae04607ab	D0901	LTW_ENG_20041123.0130	16	594	runs	run	service	service	A bus service	SUBJECT	4	NO	NO
RTE6-TEST	NO	082115d1-fc0a-4fde-b638-860275b2fdfb	D0901	APW_ENG_20050408.0034	13	595	launched	launch	process	process	The peace process between India and Pakistan	OBJECT	13	NO	NO
RTE6-TEST	NO	ba2d719c-bce7-4f4d-bfda-7eb9e57b9a9a	D0901	APW_ENG_20050408.0034	16	595	launched	launch	process	process	The peace process between India and Pakistan	OBJECT	13	NO	NO
RTE6-TEST	NO	697b7824-70ff-4fb8-a7cb-84bd04a352f9	D0901	LTW_ENG_20041123.0130	2	598	ties	tie	India	india	India and Pakistan	SUBJECT	1	YES	NO
RTE6-TEST	NO	9b5bab27-b97b-4253-8fb0-be0681706d22	D0901	LTW_ENG_20041118.0101	13	601	visit	visit	Delhi	delhi	New Delhi	OBJECT	15	NO	NO
RTE6-TEST	NO	8abafdf9-cf5a-40f9-9001-9b57dc3ae0ed	D0901	LTW_ENG_20041123.0130	3	601	visit	visit	Delhi	delhi	New Delhi	OBJECT	24	NO	NO
RTE6-TEST	NO	4c6a5c14-ac2d-460d-8768-b3df326ffa75	D0901	LTW_ENG_20041123.0130	6	601	visit	visit	Delhi	delhi	New Delhi	OBJECT	24	NO	NO
RTE6-TEST	NO	c59a2afc-fb95-4428-be25-d9e5fd4161a8	D0901	XIN_ENG_20041113.0001	4	601	visit	visit	Delhi	delhi	New Delhi	OBJECT	8	NO	NO
RTE6-TEST	NO	5df89653-feec-4af8-a9bb-4f1ec560627c	D0901	XIN_ENG_20041113.0001	9	601	visit	visit	Delhi	delhi	New Delhi	OBJECT	9	NO	NO
RTE6-TEST	NO	7ce7f1d8-a7f1-4ff4-8d79-b0c7c576ef5c	D0901	LTW_ENG_20041118.0101	4	602	alliance	alliance	Kashmir	kashmir	Indian Kashmir 's	UNKNOWN	5	NO	NO
RTE6-TEST	NO	05b18757-2b55-495d-9b1f-fb5250630b76	D0901	APW_ENG_20041118.0129	5	605	met	meet	leaders	leaders	Indian and Pakistan leaders	SUBJECT	1	NO	NO
RTE6-TEST	NO	153346d6-8f3a-4957-bd18-5a7c6e3fb2ab	D0901	LTW_ENG_20041123.0130	1	605	met	meet	leaders	leaders	Indian and Pakistan leaders	SUBJECT	0	YES	YES
RTE6-TEST	NO	e75edaf5-f5ec-485e-a05e-9f05e1756d65	D0901	LTW_ENG_20041123.0130	4	605	met	meet	leaders	leaders	Indian and Pakistan leaders	SUBJECT	3	YES	YES
RTE6-TEST	NO	a340a001-7c3e-4730-a27d-90d903f005a6	D0901	APW_ENG_20041118.0081	0	608	divided	divide	Kashmir	kashmir	Kashmir	OBJECT	2	NO	NO
RTE6-TEST	NO	98e0c637-40bb-4aae-a165-8e987104dbc1	D0901	APW_ENG_20041118.0081	0	608	divided	divide	India	india	India and Pakistan	OBJECT	1	YES	NO
RTE6-TEST	NO	9f9a4f0b-6bb9-4092-ad4b-89693a15895c	D0901	APW_ENG_20050408.0034	4	608	divided	divide	Kashmir	kashmir	Kashmir	OBJECT	5	YES	NO
RTE6-TEST	NO	90440076-7355-4aec-bcff-6e02931397d1	D0901	APW_ENG_20050408.0034	4	608	divided	divide	India	india	India and Pakistan	OBJECT	13	YES	NO
RTE6-TEST	NO	d65fc5f2-98db-43d7-9c27-30e3b0c93bc9	D0901	LTW_ENG_20041118.0101	3	608	divided	divide	Kashmir	kashmir	Kashmir	OBJECT	2	YES	YES
RTE6-TEST	NO	bd5c339e-4b72-4695-b3ce-9348d0fbf2e4	D0901	LTW_ENG_20041118.0101	3	608	divided	divide	India	india	India and Pakistan	OBJECT	2	NO	NO
RTE6-TEST	NO	43311b7c-2953-42a2-a011-e775b4e7d163	D0901	LTW_ENG_20041118.0101	11	608	divided	divide	Kashmir	kashmir	Kashmir	OBJECT	11	NO	NO
RTE6-TEST	NO	9bbe43f8-8867-4955-b447-ceabc9483c82	D0901	LTW_ENG_20041118.0101	11	608	divided	divide	India	india	India and Pakistan	OBJECT	11	NO	NO
RTE6-TEST	NO	65354e1c-f40b-41fd-b362-4df06c8126f4	D0901	LTW_ENG_20041118.0101	16	608	divided	divide	Kashmir	kashmir	Kashmir	OBJECT	18	YES	YES
RTE6-TEST	NO	ede51df6-e9ec-45ed-ab32-2843c6043b6b	D0901	LTW_ENG_20041118.0101	16	608	divided	divide	India	india	India and Pakistan	OBJECT	16	YES	NO
RTE6-TEST	NO	b514db54-fc42-4dfc-ae47-7f8520da5195	D0901	APW_ENG_20041118.0129	1	609	claimed	claim	Kashmir	kashmir	Kashmir	OBJECT	0	NO	NO
RTE6-TEST	NO	4a32d0ba-4759-444f-accb-82e1c6bf8dd1	D0901	APW_ENG_20041118.0129	1	609	claimed	claim	India	india	India and Pakistan	SUBJECT	0	NO	NO
RTE6-TEST	NO	249820e8-13ec-47bb-bc74-5b4a69e180fc	D0901	LTW_ENG_20041123.0130	24	609	claimed	claim	Kashmir	kashmir	Kashmir	OBJECT	24	NO	NO
RTE6-TEST	NO	67b831b3-cc6c-4bd6-b5c4-b606e3691de4	D0901	LTW_ENG_20041123.0130	24	609	claimed	claim	India	india	India and Pakistan	SUBJECT	24	NO	NO
RTE6-TEST	NO	c4da2857-c63e-4dba-a08c-1d3b98913b08	D0901	APW_ENG_20041118.0129	20	611	killed	kill	member	member	a state political party member	OBJECT	5	NO	NO
RTE6-TEST	NO	5366a858-0280-40f9-a62e-915e343cedb6	D0901	LTW_ENG_20041123.0130	22	612	dispute	dispute	India	india	India and Pakistan	SUBJECT	22	NO	NO
RTE6-TEST	NO	cbaa0dfc-381b-4641-a512-c90b841535e0	D0901	LTW_ENG_20041123.0130	22	612	dispute	dispute	Kashmir	kashmir	Kashmir	UNKNOWN	20	YES	NO
RTE6-TEST	NO	7225ba17-c4f5-48f4-8b36-a7b6a0392c95	D0901	AFP_ENG_20050119.0019	3	621	governments	government	Indian	indian	Indian and Pakistan	UNKNOWN	3	NO	NO
RTE6-TEST	NO	b309cd96-cb02-4f6b-8c40-a29c19754995	D0901	APW_ENG_20050408.0034	21	621	governments	government	Indian	indian	Indian and Pakistan	UNKNOWN	21	NO	NO
RTE6-TEST	NO	da3bada5-ef2c-42ea-b677-ebe22b6846eb	D0901	LTW_ENG_20041118.0101	13	621	governments	government	Indian	indian	Indian and Pakistan	UNKNOWN	11	NO	NO
RTE6-TEST	NO	30569086-c6ad-492a-bfee-19a5dc1a6054	D0901	LTW_ENG_20041118.0101	17	621	governments	government	Indian	indian	Indian and Pakistan	UNKNOWN	19	NO	NO
RTE6-TEST	NO	932c2411-8de7-4bb9-b96b-b7ef109f5383	D0901	LTW_ENG_20041123.0130	3	621	seek	seek	leaders	leaders	Separatist leaders in Indian Kashmir	SUBJECT	3	NO	NO
RTE6-TEST	NO	ad87a211-a508-4bce-aa5b-559212f360bf	D0901	XIN_ENG_20041113.0001	14	621	governments	government	Indian	indian	Indian and Pakistan	UNKNOWN	14	NO	NO
RTE6-TEST	NO	8d915244-15dd-4f32-86be-cccf346e8871	D0902	APW_ENG_20050116.0677	23	419	prevents	prevent	pill	pill	The morning-after pill	SUBJECT	25	YES	YES
RTE6-TEST	NO	028cc4ed-927e-4373-a26e-0d84675f8e18	D0902	LTW_ENG_20050128.0086	8	419	prevents	prevent	pill	pill	The morning-after pill	SUBJECT	14	NO	NO
RTE6-TEST	NO	cb69c41c-750c-44d0-b62c-4b13ba9b4e45	D0902	LTW_ENG_20050128.0086	8	419	prevents	prevent	pregnancy	pregnancy	pregnancy	OBJECT	8	NO	NO
RTE6-TEST	NO	392347a6-046c-48a9-abc7-0e5e0fe574e8	D0902	LTW_ENG_20050128.0086	20	419	prevents	prevent	pill	pill	The morning-after pill	SUBJECT	21	YES	YES
RTE6-TEST	NO	6295ec8c-e235-44cc-a139-a6957de2a0cb	D0902	APW_ENG_20041017.0142	18	420	known	know	also	also	also	MODIFIER	18	NO	NO
RTE6-TEST	NO	79c754e0-a973-4c43-a136-e94aead0fe37	D0902	APW_ENG_20041011.0452	1	421	control	control	birth	birth	birth	UNKNOWN	1	YES	NO
RTE6-TEST	NO	71c569be-f30c-40e9-9b79-bd272ebcf3d5	D0902	LTW_ENG_20050128.0086	0	421	control	control	birth	birth	birth	UNKNOWN	0	YES	NO
RTE6-TEST	NO	0dde762a-f567-40d8-8519-d675e51bbbcc	D0902	AFP_ENG_20050303.0593	2	424	use	use	pill	pill	the emergency contraception pill	OBJECT	1	YES	YES
RTE6-TEST	NO	cc1882ce-2c1d-4ba2-9c9a-ecc9ced8904f	D0902	APW_ENG_20041017.0142	14	424	use	use	pill	pill	the emergency contraception pill	OBJECT	11	NO	NO
RTE6-TEST	NO	5cb1009f-33f2-48f0-8697-5f124131829a	D0902	APW_ENG_20041017.0142	18	424	use	use	pill	pill	the emergency contraception pill	OBJECT	19	YES	YES
RTE6-TEST	NO	4525272f-2b73-4270-afe4-a7419e953777	D0902	APW_ENG_20041017.0142	27	424	use	use	pill	pill	the emergency contraception pill	OBJECT	25	YES	YES
RTE6-TEST	NO	ed408574-b85e-48e2-8e69-8e830c1bf5fa	D0902	APW_ENG_20050116.0677	19	424	approved	approve	Administration	administration	The Food and Drug Administration	SUBJECT	2	YES	YES
RTE6-TEST	NO	b3cf2bf2-519e-4f57-aa73-f353c943dad9	D0902	APW_ENG_20050116.0677	19	424	approved	approve	use	use	the use of the emergency contraception pill in 1998	OBJECT	22	YES	YES
RTE6-TEST	NO	e8701734-ff9c-4469-8e8f-a5d1689ef70e	D0902	APW_ENG_20050116.0677	22	424	use	use	pill	pill	the emergency contraception pill	OBJECT	25	YES	YES
RTE6-TEST	NO	175dbf03-ae6d-4883-b923-bdc64aa5c91e	D0902	APW_ENG_20050116.0677	28	424	approved	approve	Administration	administration	The Food and Drug Administration	SUBJECT	2	YES	YES
RTE6-TEST	NO	183e6de0-095b-4087-baa1-52ec26201bf4	D0902	APW_ENG_20050116.0677	28	424	approved	approve	use	use	the use of the emergency contraception pill in 1998	OBJECT	25	NO	NO
RTE6-TEST	NO	edcefec4-01cc-4181-b71c-7eee98258ea4	D0902	LTW_ENG_20041025.0079	11	424	use	use	pill	pill	the emergency contraception pill	OBJECT	7	YES	YES
RTE6-TEST	NO	0522e5c4-35bc-48f5-83ea-e2a5d2dd4f5a	D0902	LTW_ENG_20041025.0079	13	424	approved	approve	Administration	administration	The Food and Drug Administration	SUBJECT	8	YES	YES
RTE6-TEST	NO	8d082e5f-0e5e-490e-8e7d-06748eddf468	D0902	LTW_ENG_20041025.0079	13	424	approved	approve	use	use	the use of the emergency contraception pill in 1998	OBJECT	11	NO	NO
RTE6-TEST	NO	71dab9b2-8a7c-48ee-a2a2-a78f2dc47bf3	D0902	LTW_ENG_20050104.0119	2	424	use	use	pill	pill	the emergency contraception pill	OBJECT	3	YES	YES
RTE6-TEST	NO	566e81e7-ad44-4044-a079-aa67ad85098b	D0902	LTW_ENG_20050104.0119	8	424	use	use	pill	pill	the emergency contraception pill	OBJECT	3	YES	YES
RTE6-TEST	NO	1ae0cc37-99cc-421e-8140-562acccbf781	D0902	LTW_ENG_20050104.0119	17	424	use	use	pill	pill	the emergency contraception pill	OBJECT	15	NO	NO
RTE6-TEST	NO	86e893c7-daee-44ad-a66f-548c7f12c432	D0902	LTW_ENG_20050104.0119	23	424	approved	approve	Administration	administration	The Food and Drug Administration	SUBJECT	4	YES	YES
RTE6-TEST	NO	415279d5-bea3-4795-a846-a1e8760a771b	D0902	LTW_ENG_20050104.0119	23	424	use	use	pill	pill	the emergency contraception pill	OBJECT	15	NO	NO
RTE6-TEST	NO	d75ab7c6-ed0b-4364-b465-388208193ae5	D0902	LTW_ENG_20050107.0099	4	424	approved	approve	Administration	administration	The Food and Drug Administration	SUBJECT	1	YES	YES
RTE6-TEST	NO	e7d12b4b-3c7d-4eec-9382-e804ef299898	D0902	LTW_ENG_20050107.0099	4	424	approved	approve	use	use	the use of the emergency contraception pill in 1998	OBJECT	19	YES	NO
RTE6-TEST	NO	8be60c0f-91b8-4f0b-bd35-37e839f0f2bf	D0902	LTW_ENG_20050107.0099	9	424	approved	approve	Administration	administration	The Food and Drug Administration	SUBJECT	9	NO	NO
RTE6-TEST	NO	18a43ad4-3680-4e4e-93d1-6c25568a2bd2	D0902	LTW_ENG_20050107.0099	9	424	approved	approve	use	use	the use of the emergency contraception pill in 1998	OBJECT	19	YES	YES
RTE6-TEST	NO	5468c6cc-a806-4e06-be9e-21f0ce830bfa	D0902	LTW_ENG_20050107.0099	19	424	use	use	pill	pill	the emergency contraception pill	OBJECT	2	YES	YES
RTE6-TEST	NO	62799dc7-6661-419b-9b70-d49647907194	D0902	LTW_ENG_20050107.0099	23	424	use	use	pill	pill	the emergency contraception pill	OBJECT	2	YES	YES
RTE6-TEST	NO	e8afd27a-f309-48ac-bdbe-b60c87c088b5	D0902	APW_ENG_20050116.0677	26	427	sold	sell	contraceptive	contraceptive	an emergency contraceptive	OBJECT	30	YES	NO
RTE6-TEST	NO	6d63c54b-744d-4133-b0c4-8e1c6fb531d3	D0902	LTW_ENG_20050104.0119	20	427	sold	sell	contraceptive	contraceptive	an emergency contraceptive	OBJECT	1	YES	YES
RTE6-TEST	NO	37b3b4aa-ef4d-4b7a-ada7-3f8030d8b9a8	D0902	LTW_ENG_20050104.0119	20	427	sold	sell	counter	counter	the counter	OBJECT	20	YES	NO
RTE6-TEST	NO	480405f0-4a2a-4a4f-a036-56fb5d16f881	D0902	LTW_ENG_20050107.0099	4	427	sold	sell	counter	counter	the counter	OBJECT	3	YES	NO
RTE6-TEST	NO	6c4550aa-c918-4f99-98c9-8bce706593c8	D0902	LTW_ENG_20041025.0079	7	428	allow	allow	Administration	administration	The Food and Drug Administration	SUBJECT	7	NO	NO
RTE6-TEST	NO	3c65966f-b515-428e-8571-4fdf60972015	D0902	LTW_ENG_20050104.0119	23	428	allow	allow	sales	sales	over-the-counter sales of Plan B.	OBJECT	13	YES	NO
RTE6-TEST	NO	9745ac63-1f46-49c9-ad43-33a84380de41	D0902	LTW_ENG_20050104.0119	23	428	allow	allow	Administration	administration	The Food and Drug Administration	SUBJECT	4	NO	NO
RTE6-TEST	NO	7b6d393e-23cb-4f54-9590-5d31a03c4638	D0902	LTW_ENG_20050107.0099	6	428	allow	allow	sales	sales	over-the-counter sales of Plan B.	OBJECT	16	YES	NO
RTE6-TEST	NO	74fedc59-9b67-4b4b-a9ac-a622b3582c9e	D0902	LTW_ENG_20050107.0099	6	428	allow	allow	Administration	administration	The Food and Drug Administration	SUBJECT	9	NO	NO
RTE6-TEST	NO	d2c4d40f-660e-4fc6-8b35-a9242b4e0701	D0902	LTW_ENG_20050107.0099	16	428	allow	allow	sales	sales	over-the-counter sales of Plan B.	OBJECT	16	YES	NO
RTE6-TEST	NO	5bea7621-af80-4391-96ac-ee283647d09f	D0902	LTW_ENG_20050107.0099	16	428	allow	allow	Administration	administration	The Food and Drug Administration	SUBJECT	19	NO	NO
RTE6-TEST	NO	6eb5fa50-6eea-4f8b-b36c-71448053b348	D0902	LTW_ENG_20050128.0086	14	428	allow	allow	Administration	administration	The Food and Drug Administration	SUBJECT	11	NO	NO
RTE6-TEST	NO	9801f2cd-4c4a-491c-b842-efa1d818d2fb	D0902	LTW_ENG_20050128.0086	14	428	refused	refuse	Administration	administration	The Food and Drug Administration	SUBJECT	11	NO	NO
RTE6-TEST	NO	3bdc3e9c-ff99-48c2-8ed1-4a144ce18df3	D0902	APW_ENG_20041011.0452	1	429	control	control	birth	birth	birth	UNKNOWN	1	YES	NO
RTE6-TEST	NO	0b290d76-e21b-47e5-b485-07bc47ea074f	D0902	LTW_ENG_20050104.0119	23	429	dispense	dispense	pharmacies	pharmacy	pharmacies	SUBJECT	24	YES	NO
RTE6-TEST	NO	7896c8c0-4525-4c97-8903-e8a955d98c1d	D0902	LTW_ENG_20050128.0086	0	429	control	control	birth	birth	birth	UNKNOWN	0	YES	NO
RTE6-TEST	NO	91d39cf6-57aa-42ab-a6c8-d74e7860b1b8	D0902	NYT_ENG_20041130.0307	3	429	dispense	dispense	pharmacies	pharmacy	pharmacies	SUBJECT	29	YES	NO
RTE6-TEST	NO	0dd7f308-e730-4ad5-913c-71a7608a37c7	D0902	NYT_ENG_20041130.0307	3	429	dispense	dispense	control	control	birth control and emergency contraceptives	OBJECT	14	YES	NO
RTE6-TEST	NO	846c947e-ff38-4fb9-99f4-71a6ee6a3a4d	D0902	NYT_ENG_20041130.0307	1	430	filed	file	pharmacist	pharmacist	A pharmacist in Illinois	SUBJECT	1	NO	NO
RTE6-TEST	NO	99a903e4-bd91-4f1c-8765-fb415eeec390	D0902	NYT_ENG_20041130.0307	7	430	filed	file	pharmacist	pharmacist	A pharmacist in Illinois	SUBJECT	7	NO	NO
RTE6-TEST	NO	01d393ab-9d5d-46de-a7a8-13abf8936bbb	D0902	APW_ENG_20041011.0452	1	431	control	control	birth	birth	birth	UNKNOWN	1	YES	NO
RTE6-TEST	NO	0d768f50-63c6-4ce9-8f77-d5dfbfa309b6	D0902	LTW_ENG_20050104.0119	6	431	refusing	refuse	pharmacists	pharmacist	Some pharmacists around the United States	SUBJECT	23	NO	NO
RTE6-TEST	NO	510cb398-2d99-4992-8359-482db2c1f962	D0902	LTW_ENG_20050128.0086	0	431	control	control	birth	birth	birth	UNKNOWN	0	YES	NO
RTE6-TEST	NO	47fd9730-42af-46b1-b7e2-02f3622bdff1	D0902	LTW_ENG_20050128.0086	14	431	fill	fill	pharmacists	pharmacist	Some pharmacists around the United States	SUBJECT	14	YES	NO
RTE6-TEST	NO	70b36244-45b8-4daa-a121-795f1cc822d9	D0902	LTW_ENG_20050128.0086	14	431	refusing	refuse	pharmacists	pharmacist	Some pharmacists around the United States	SUBJECT	14	YES	NO
RTE6-TEST	NO	a8d82c6d-97e6-4287-bdd1-0f5f12a124d9	D0902	NYT_ENG_20041130.0307	0	431	fill	fill	control	control	birth control	OBJECT	14	YES	NO
RTE6-TEST	NO	0247065a-dfa8-487a-b210-66b2ea04f951	D0902	NYT_ENG_20041130.0307	0	431	fill	fill	pharmacists	pharmacist	Some pharmacists around the United States	SUBJECT	1	YES	YES
RTE6-TEST	NO	ccc32b8d-7a49-49d4-84a7-92409b4f2c62	D0902	NYT_ENG_20041130.0307	0	431	refusing	refuse	pharmacists	pharmacist	Some pharmacists around the United States	SUBJECT	1	YES	YES
[truncated: 2,023 more rows]
